# Supplementary material for: Association of Preoperative NANOG-Positive Circulating Tumor Cell Levels With Recurrence of Hepatocellular Carcinoma
Source: PubMed Central journal article supplement (PMC8190394; doi:10.3389/fonc.2021.601668), 2021-05-27

# Immunohistochemical microarray data

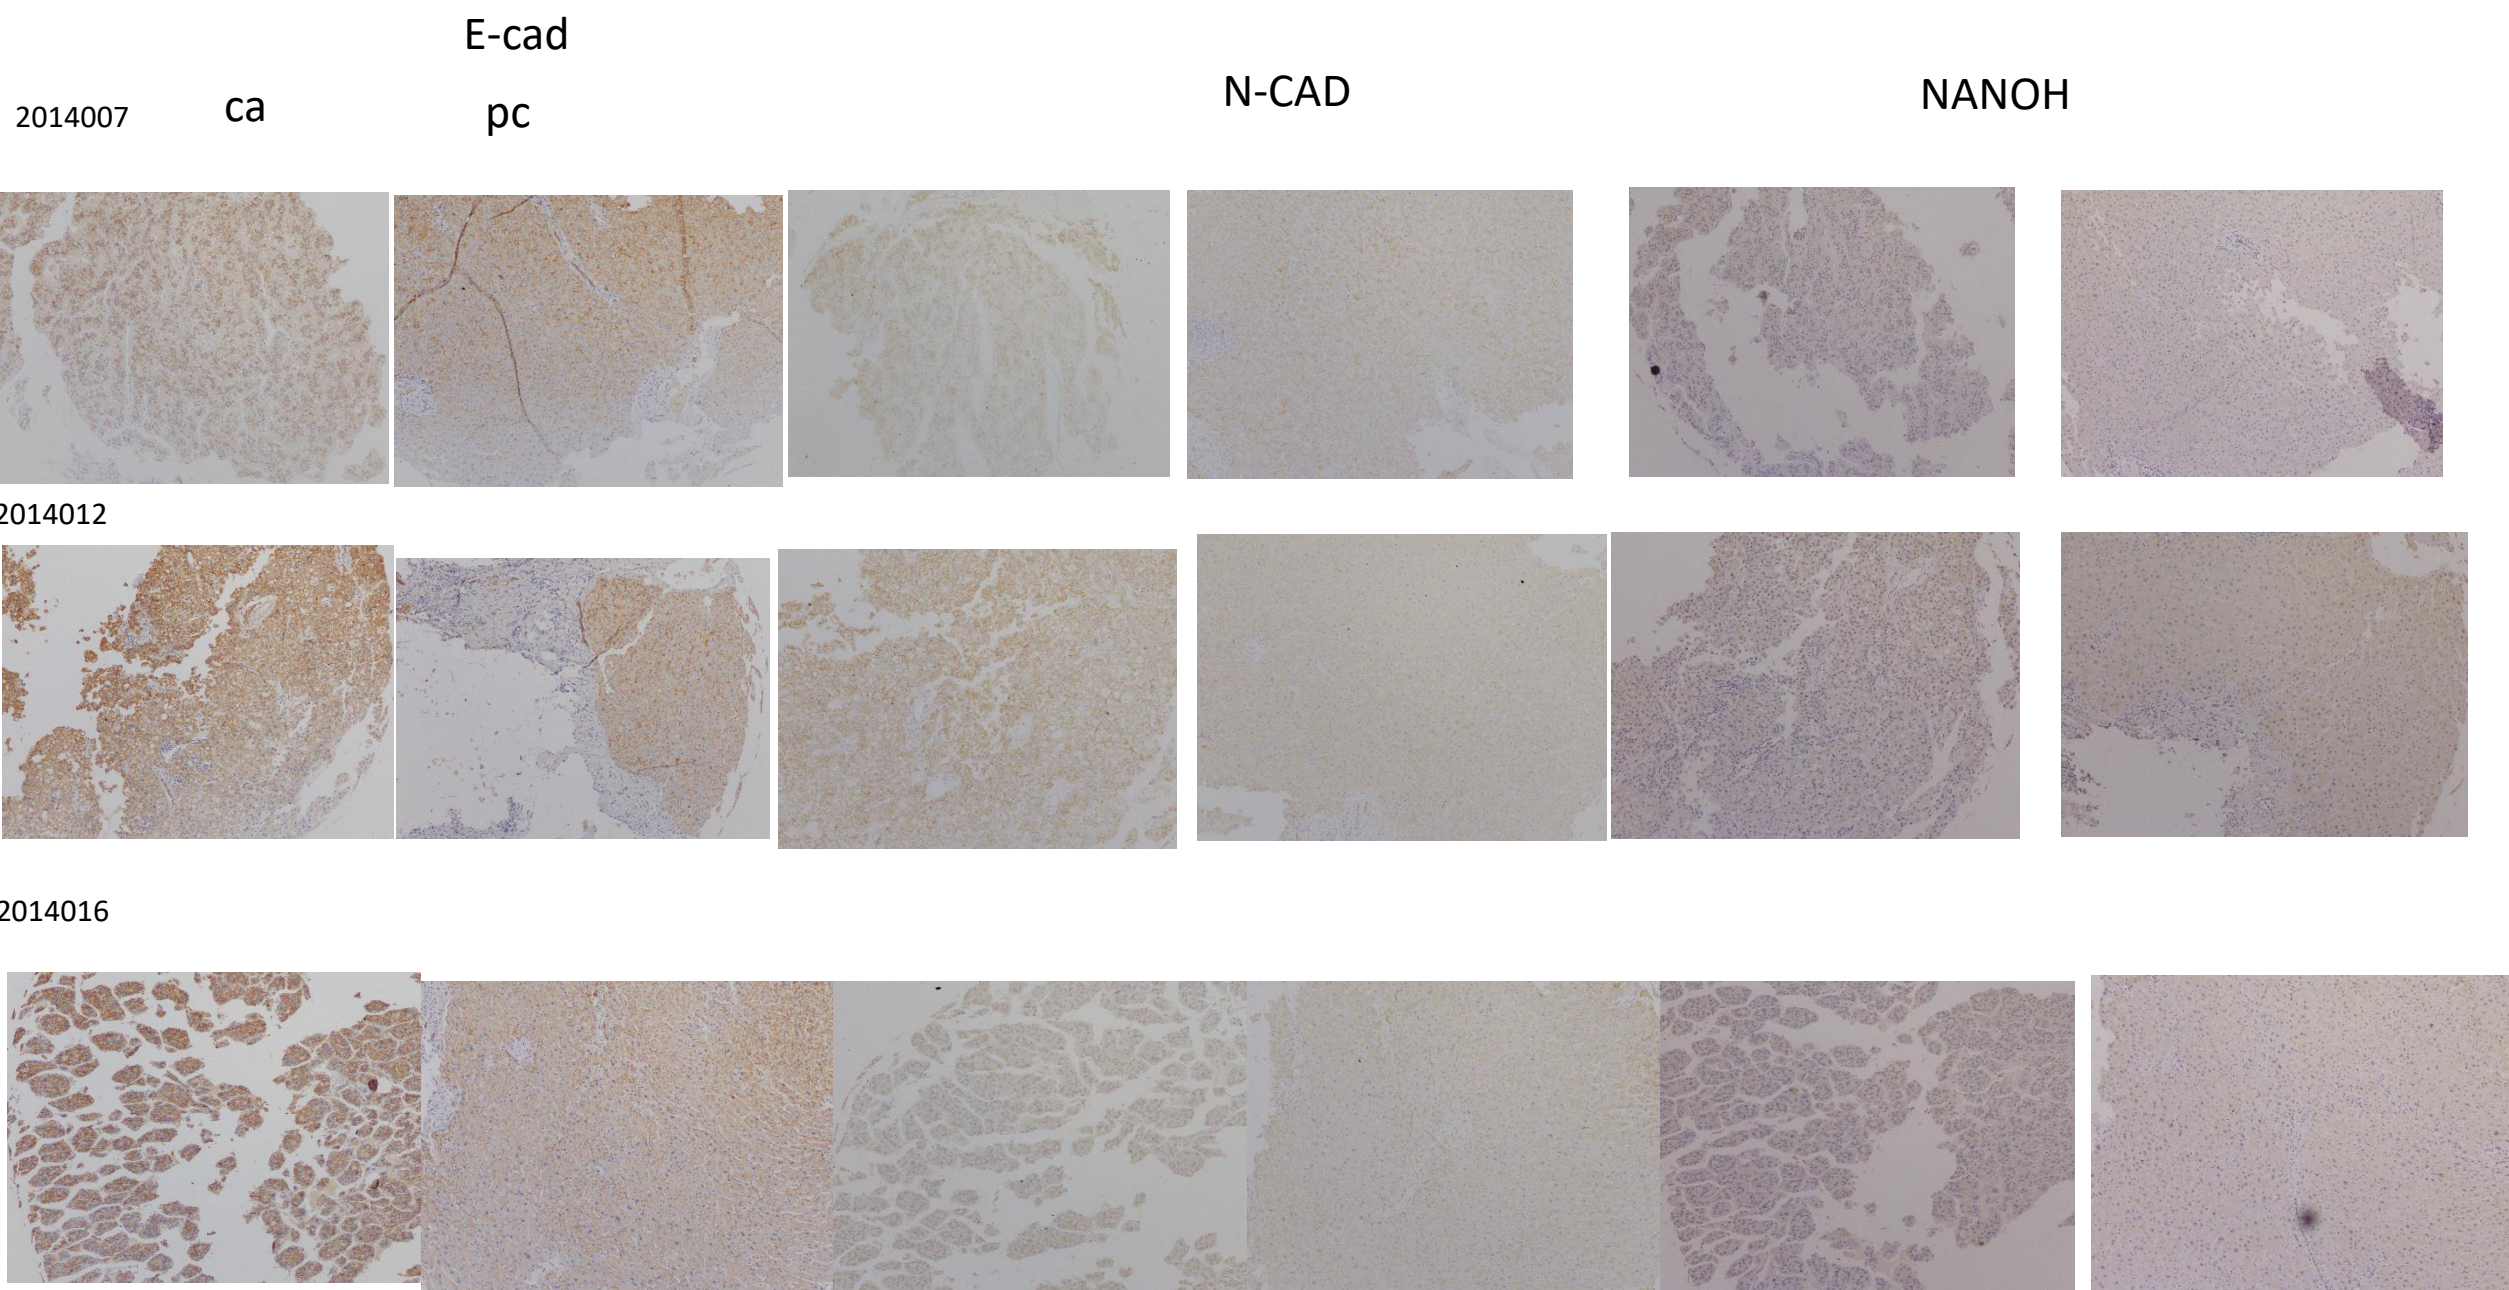

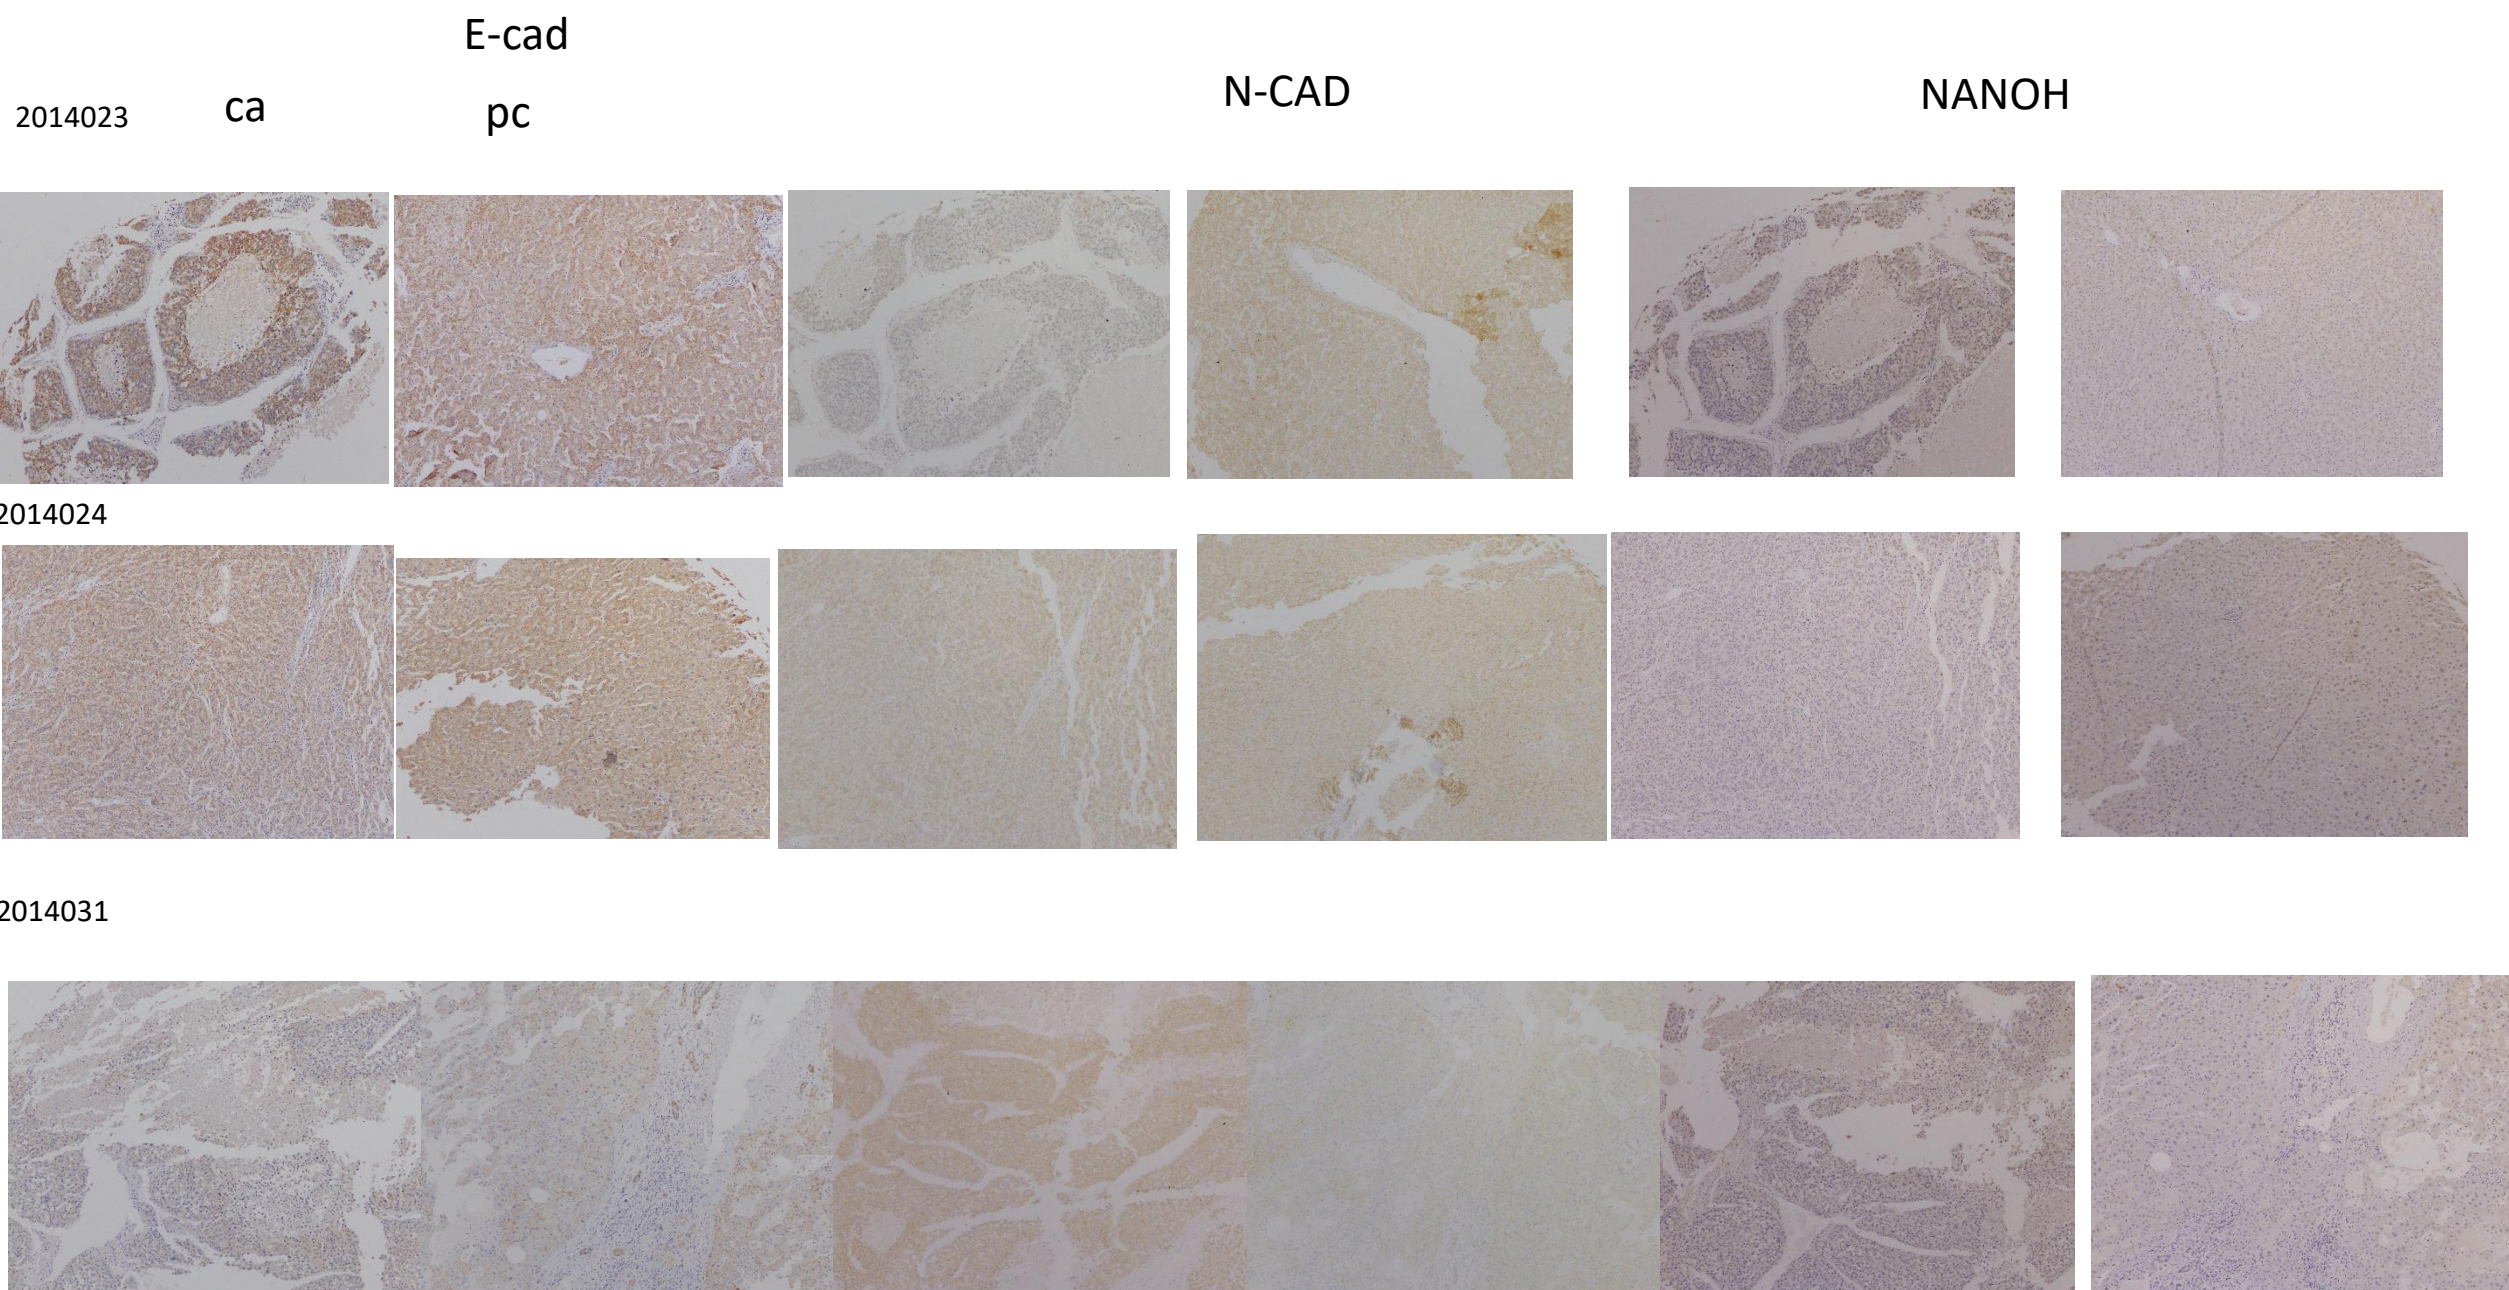

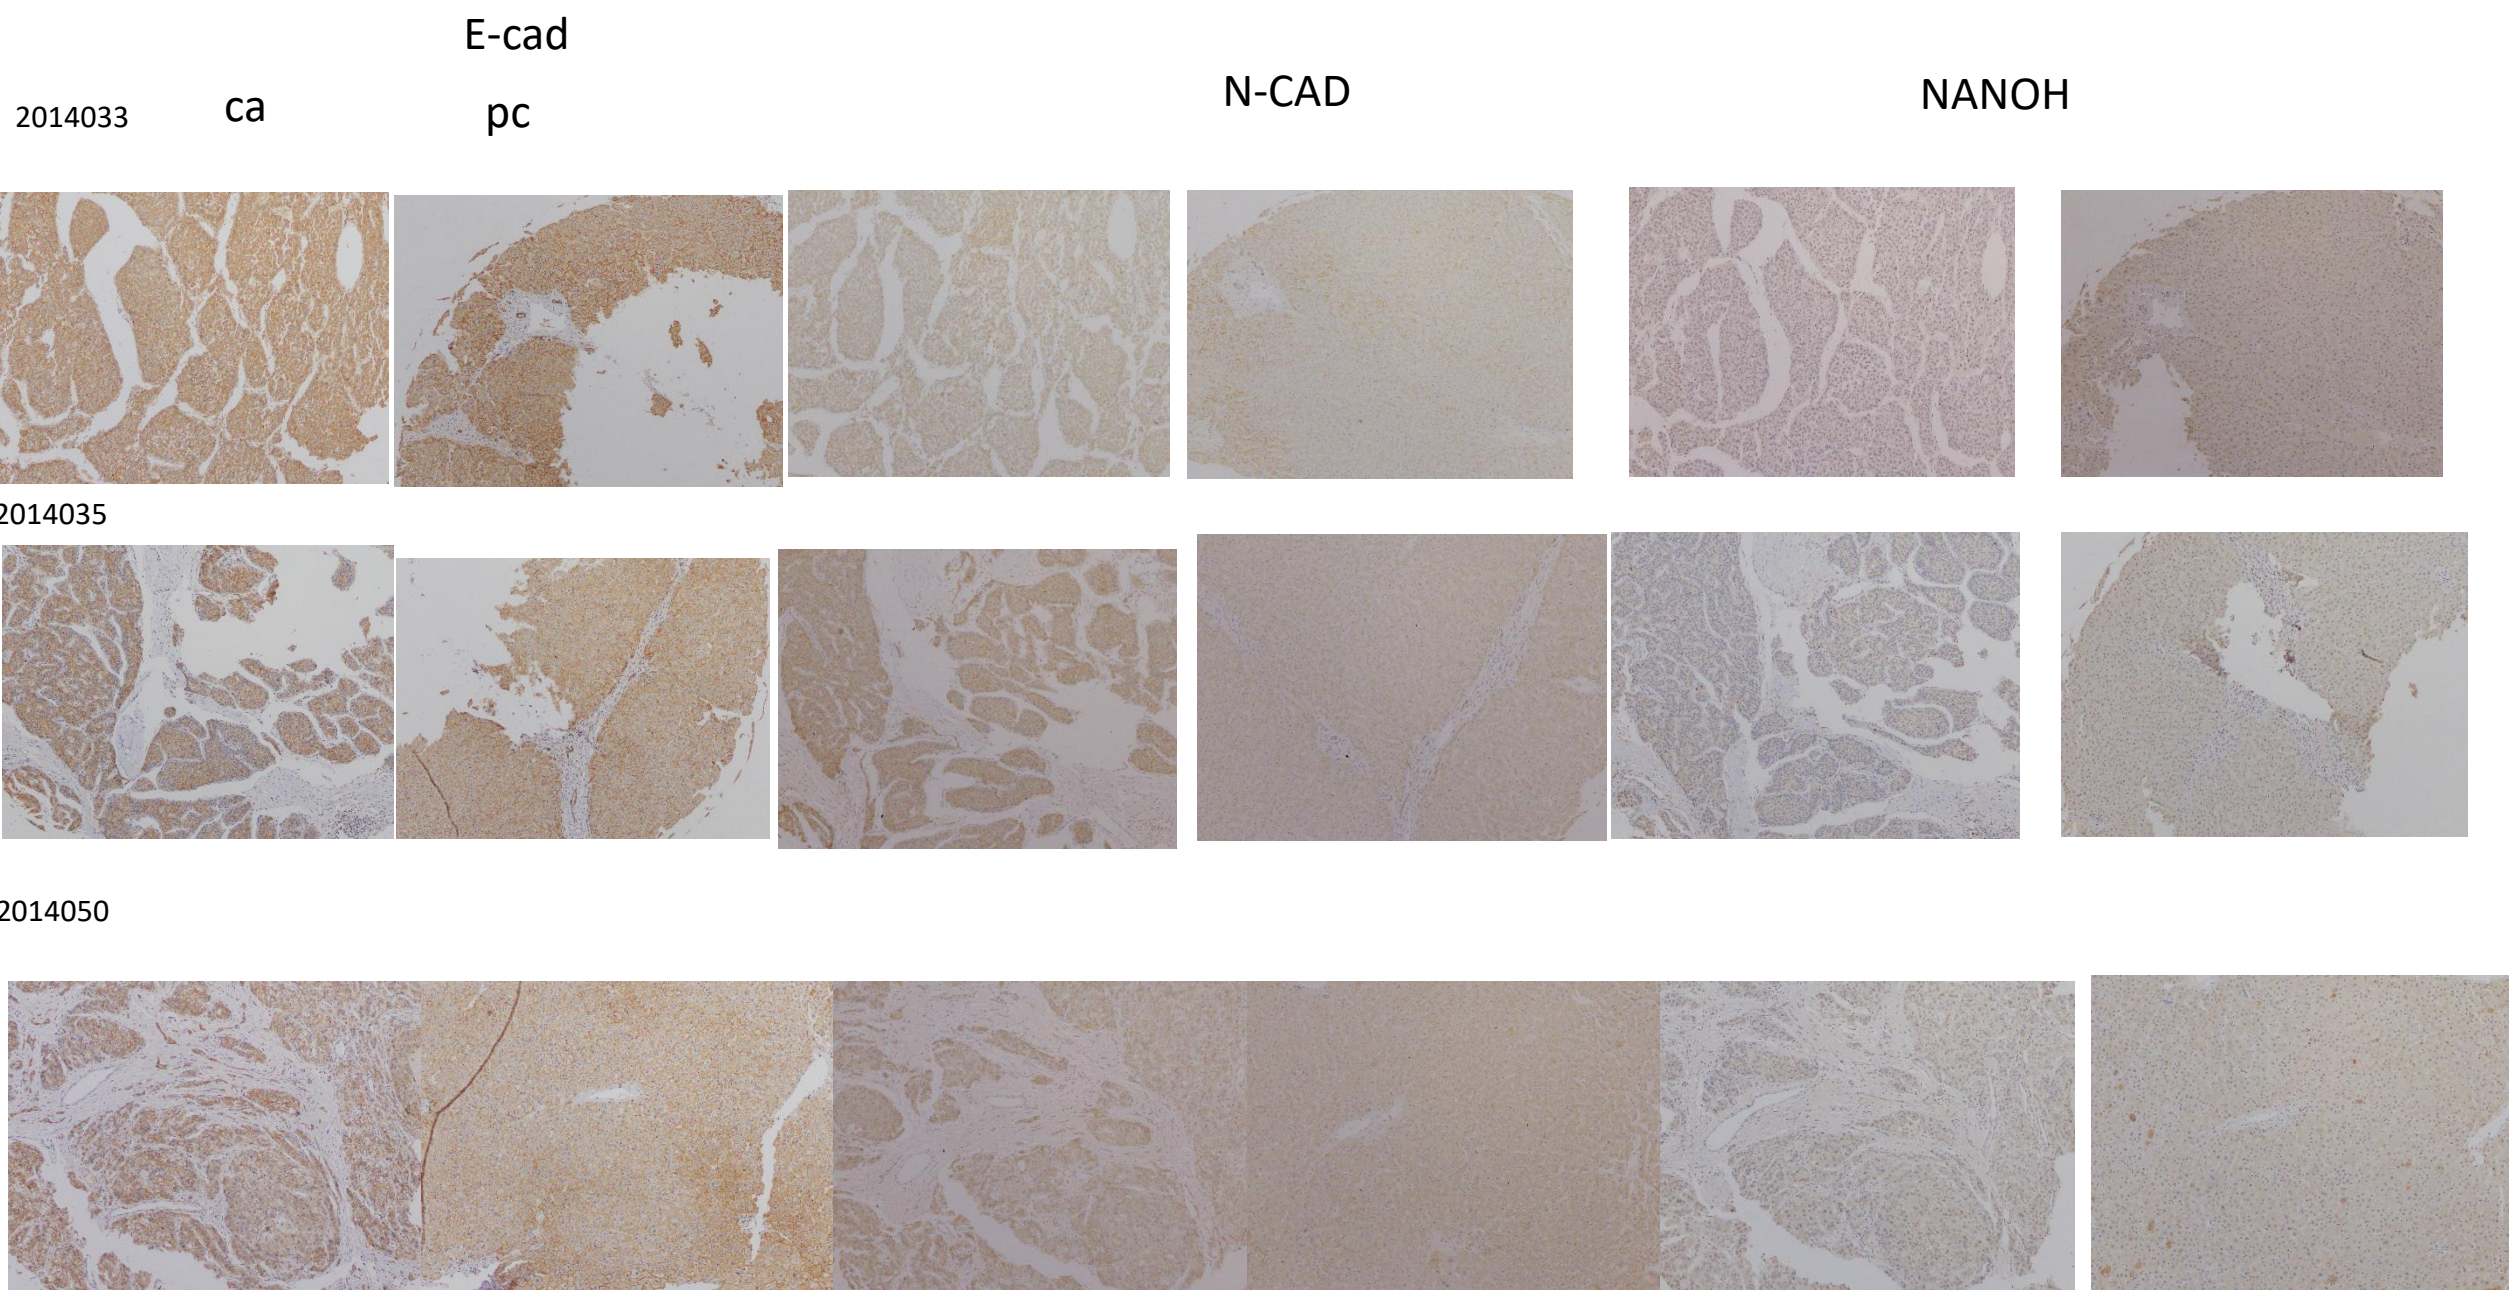

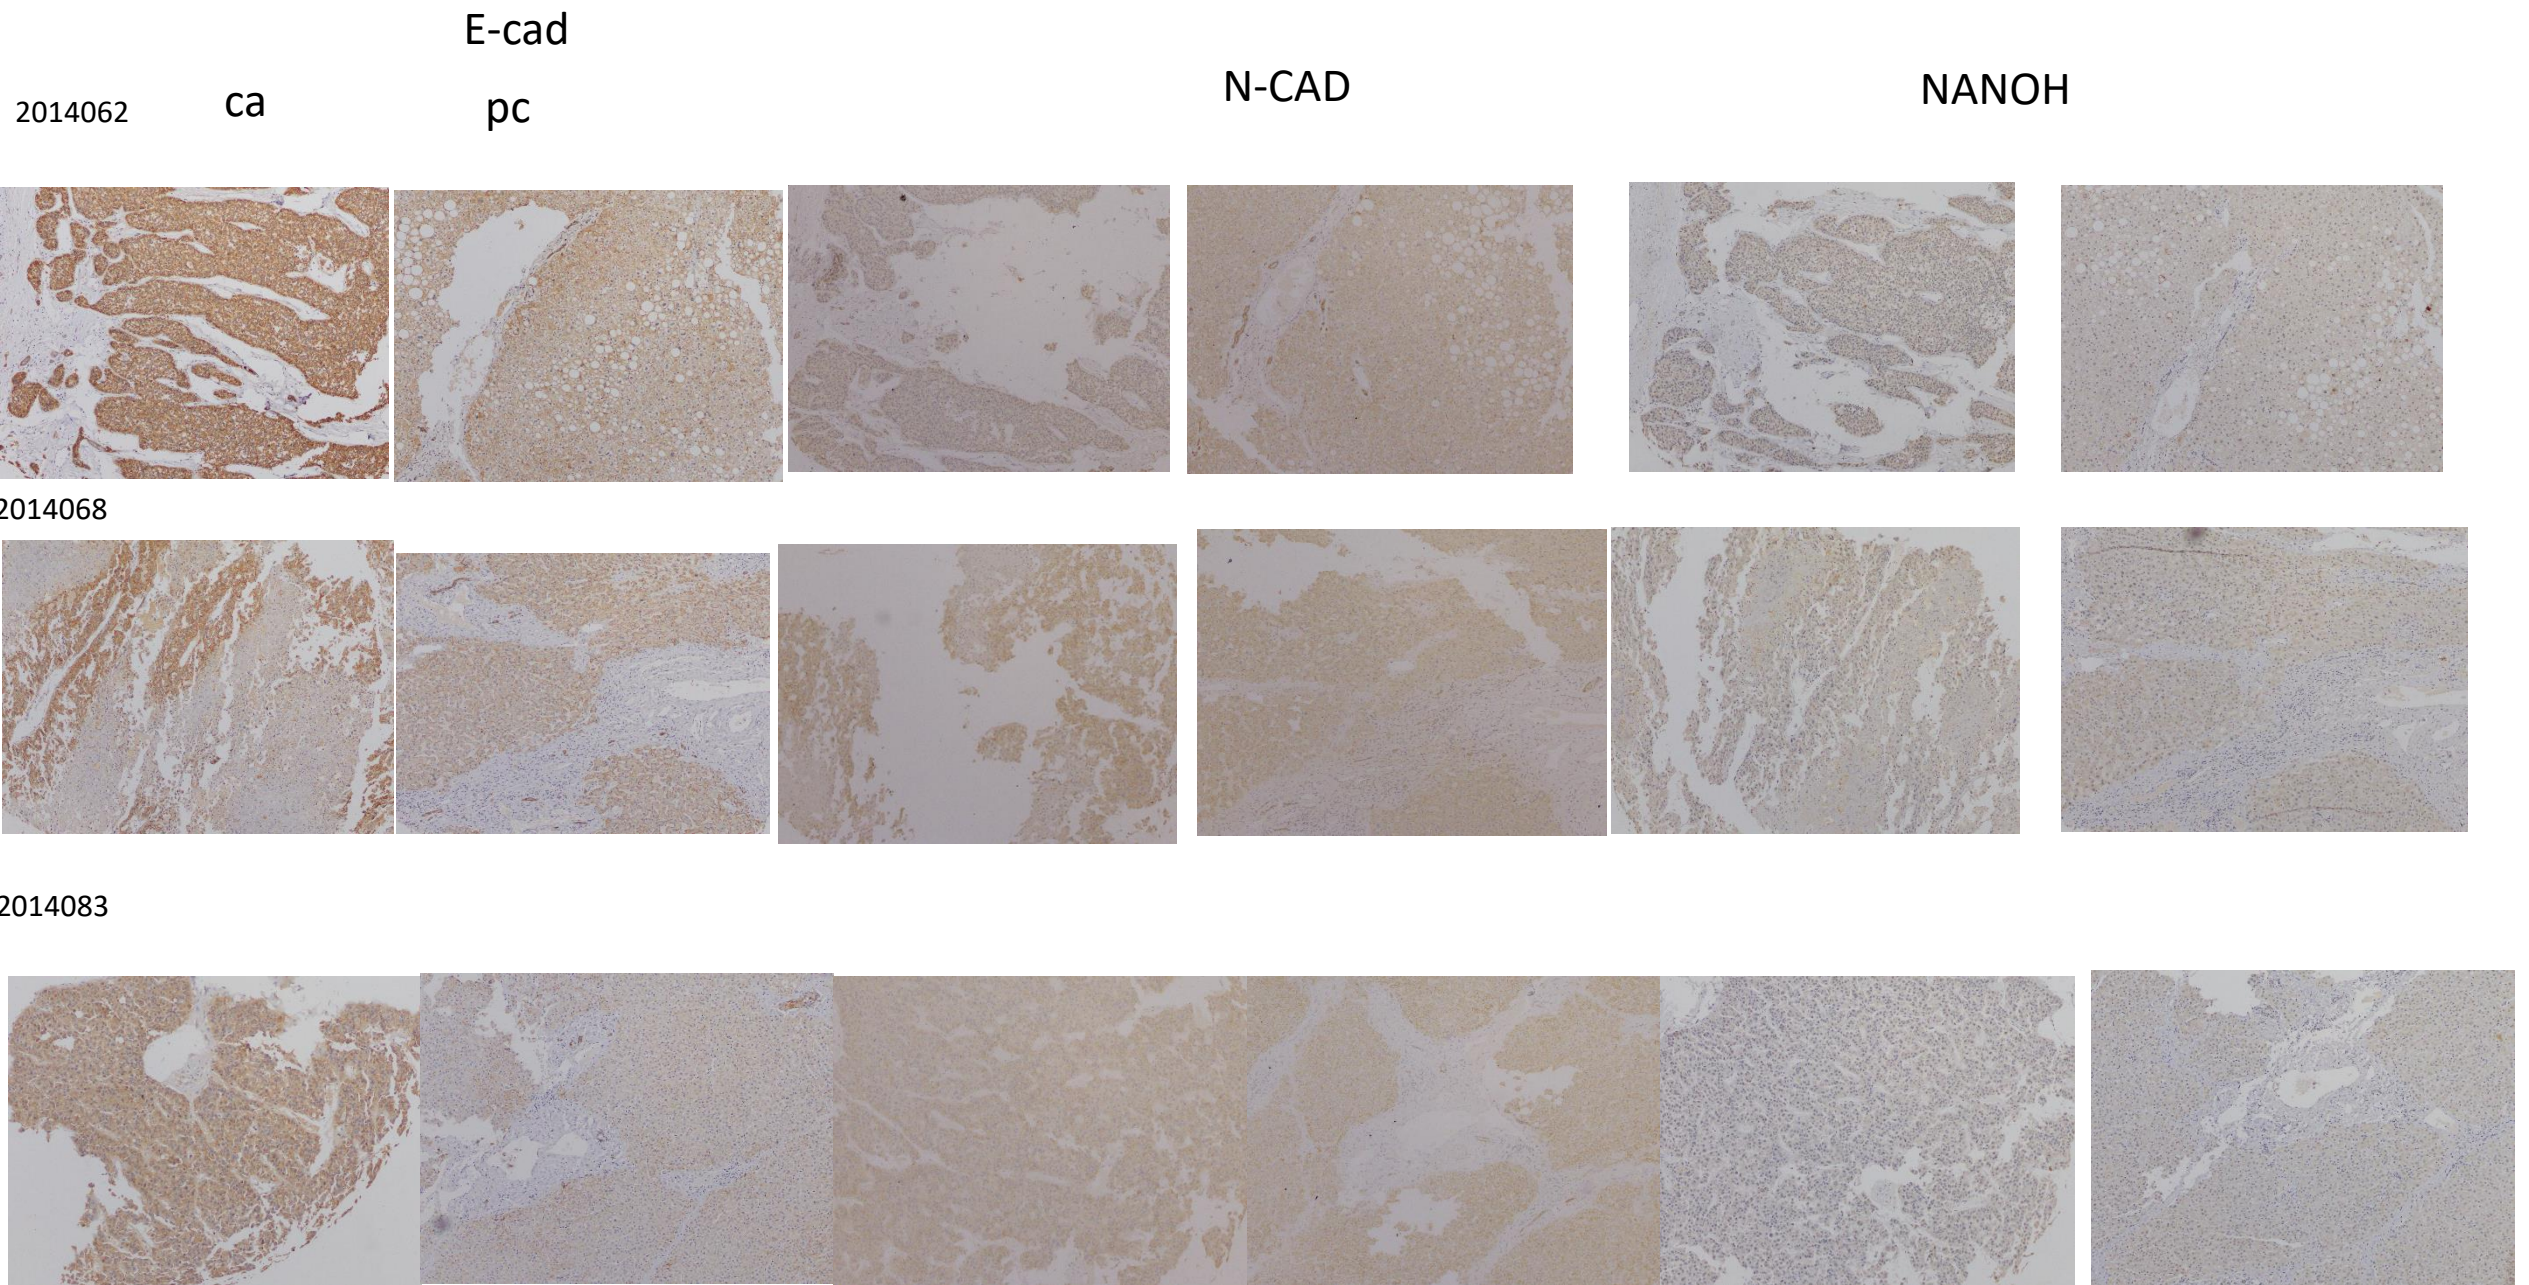

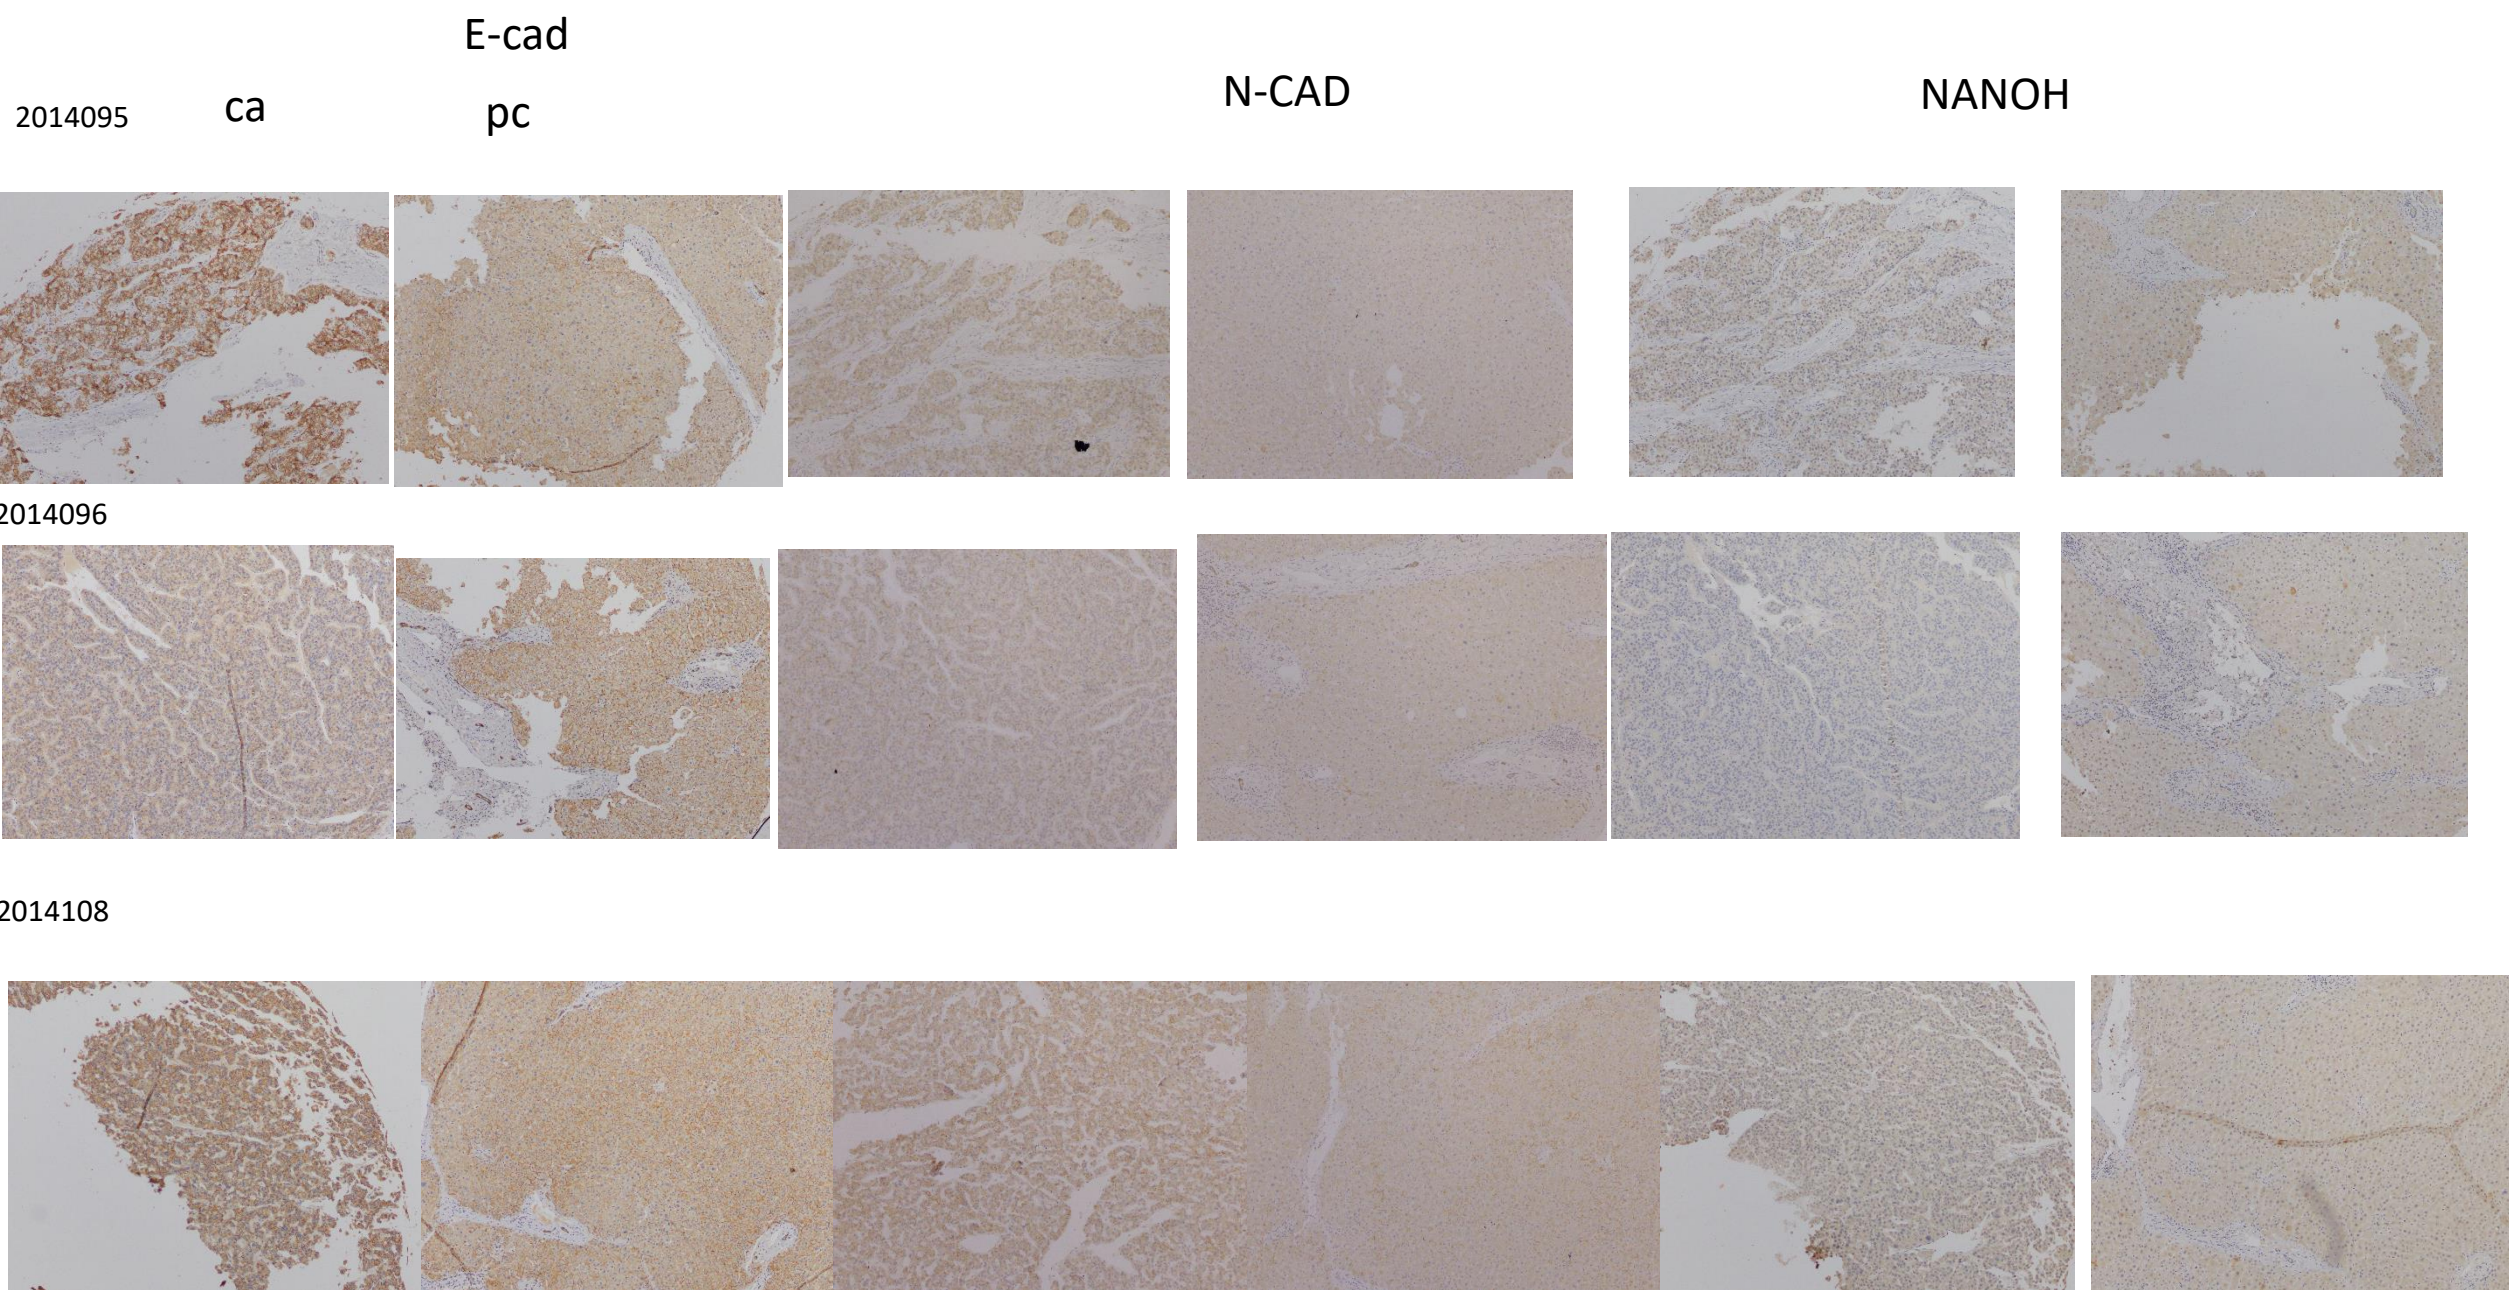

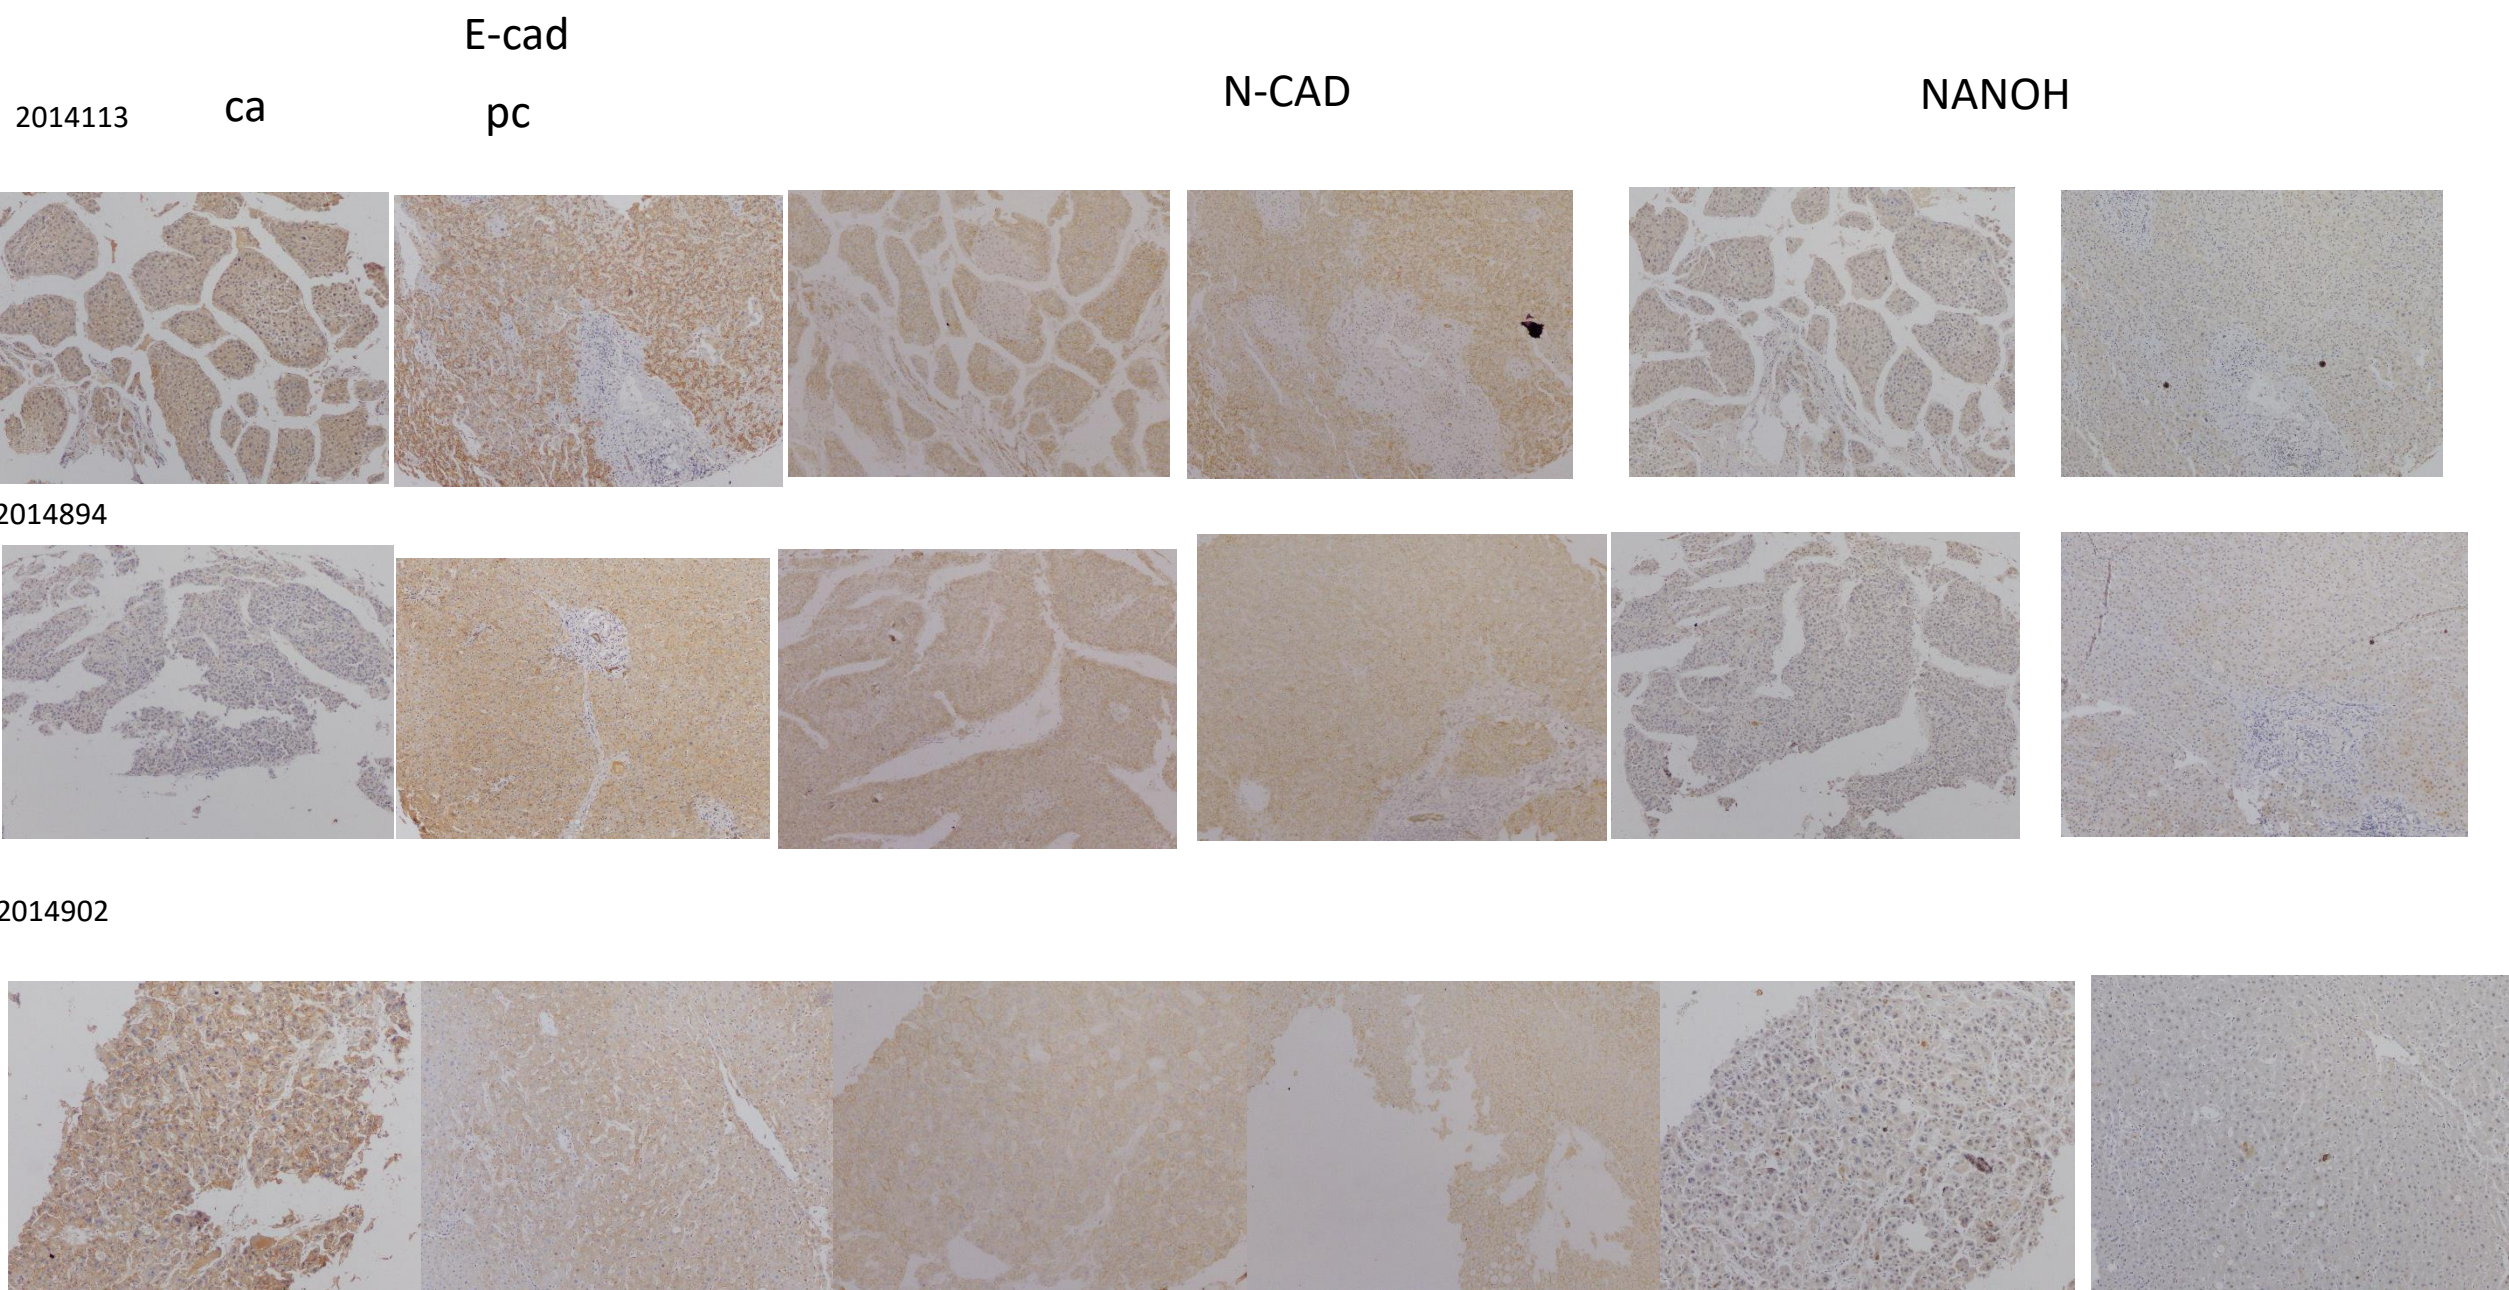

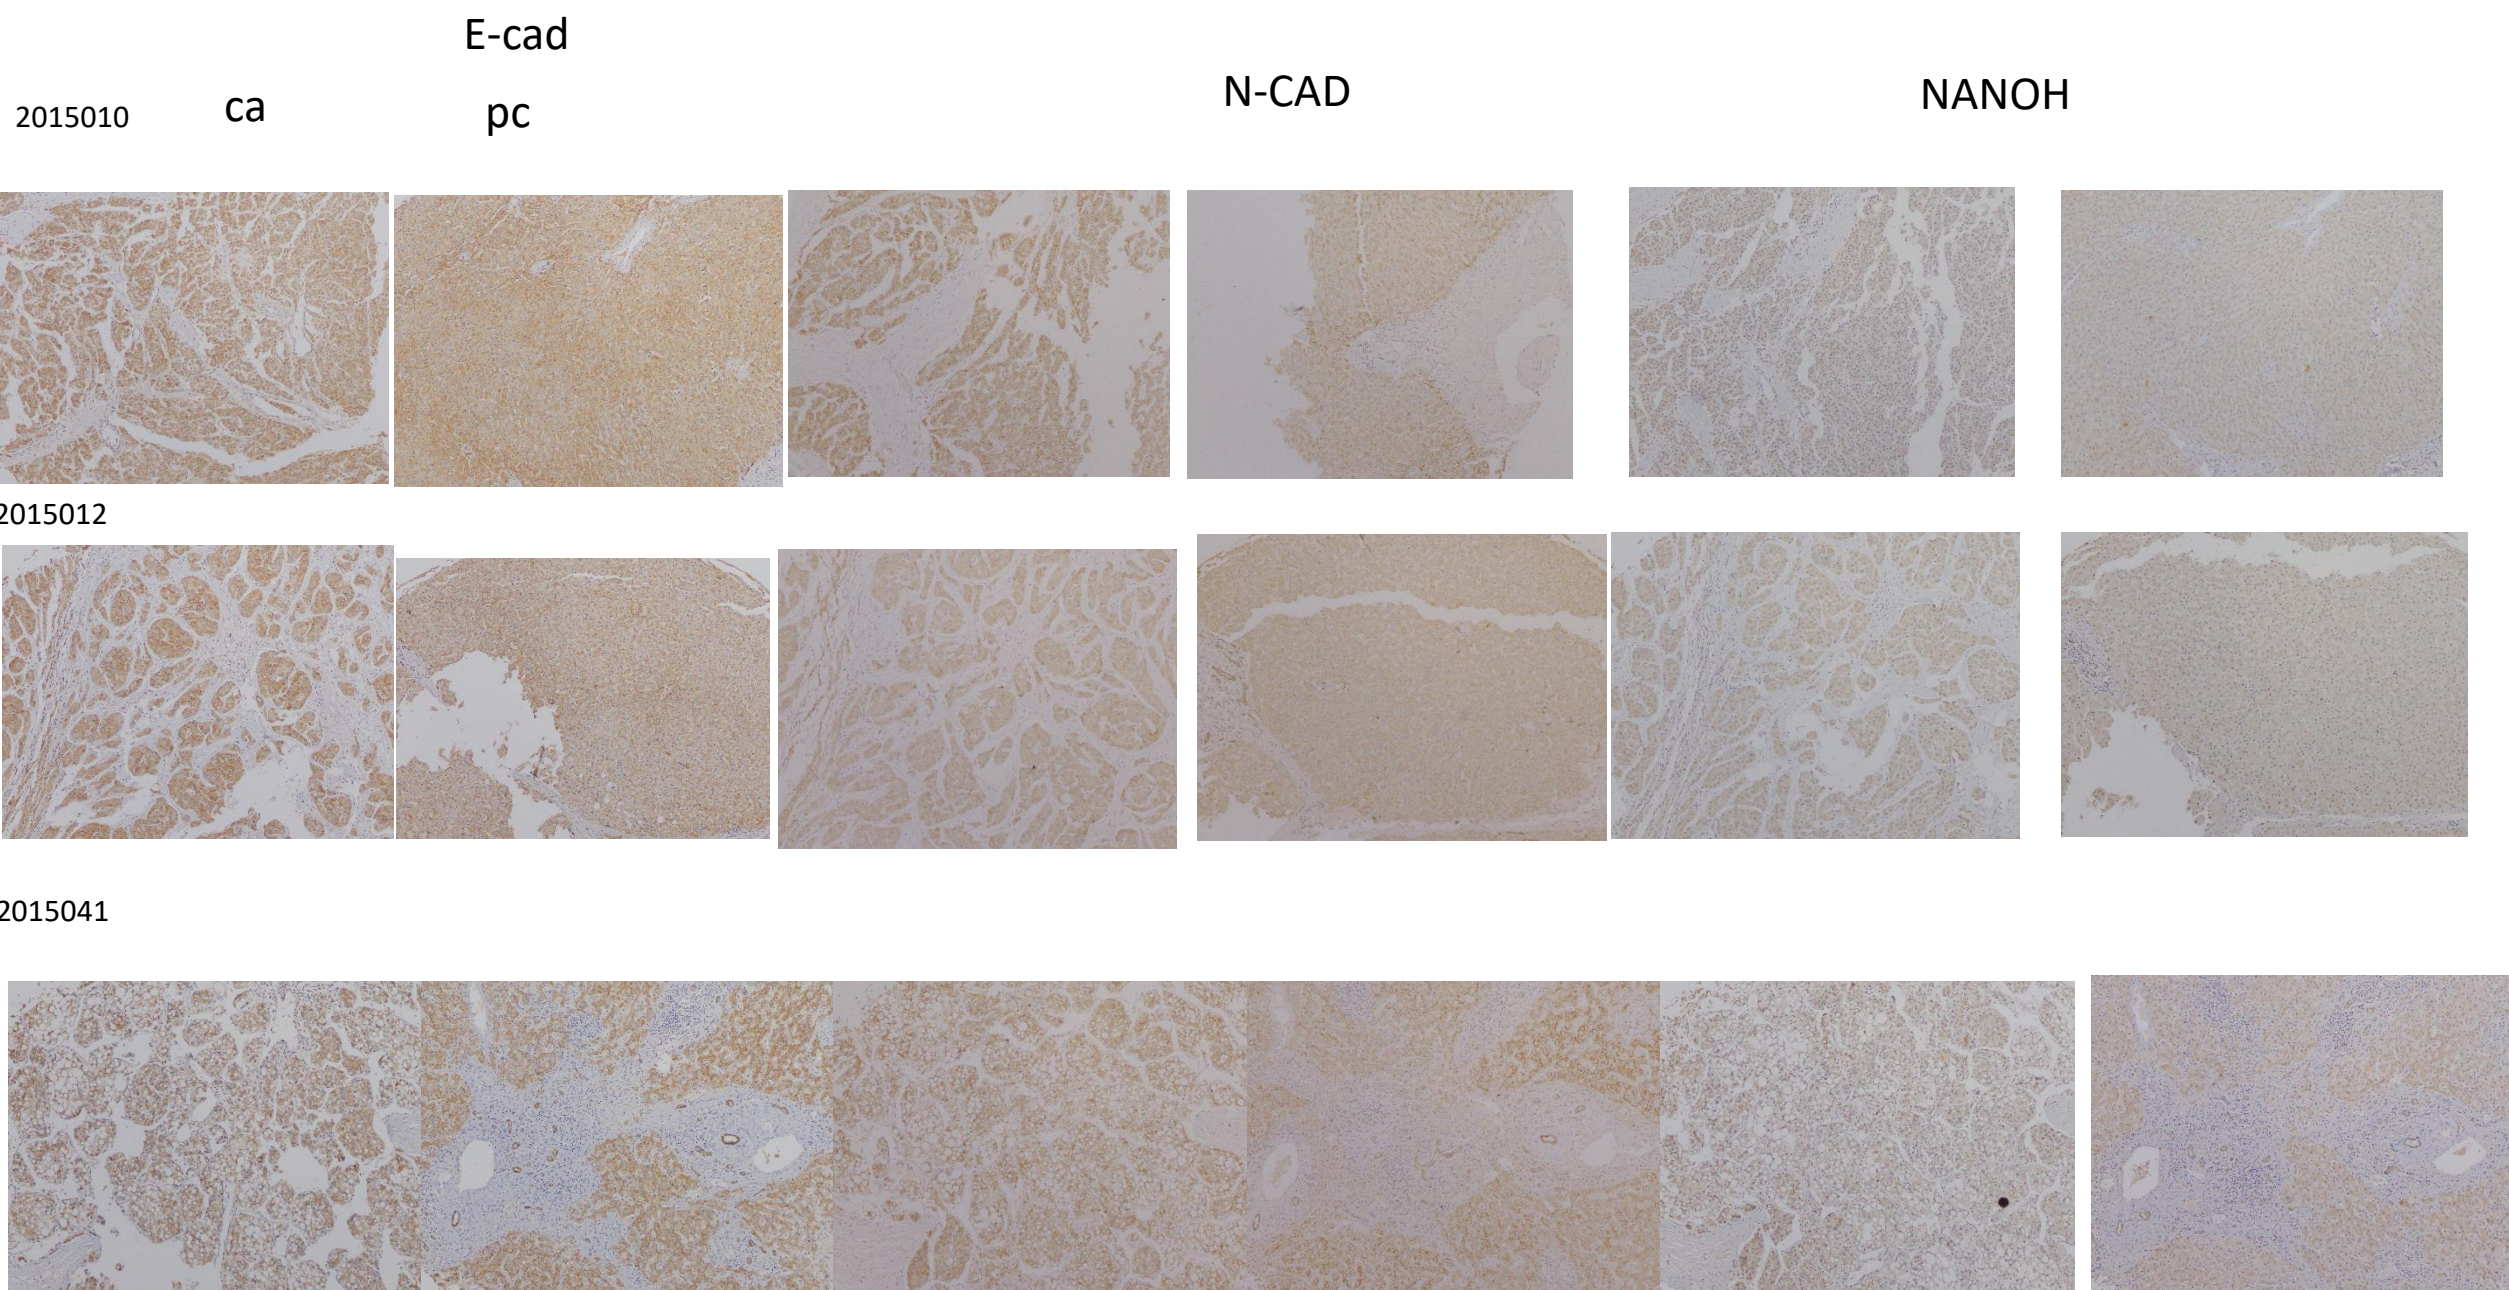



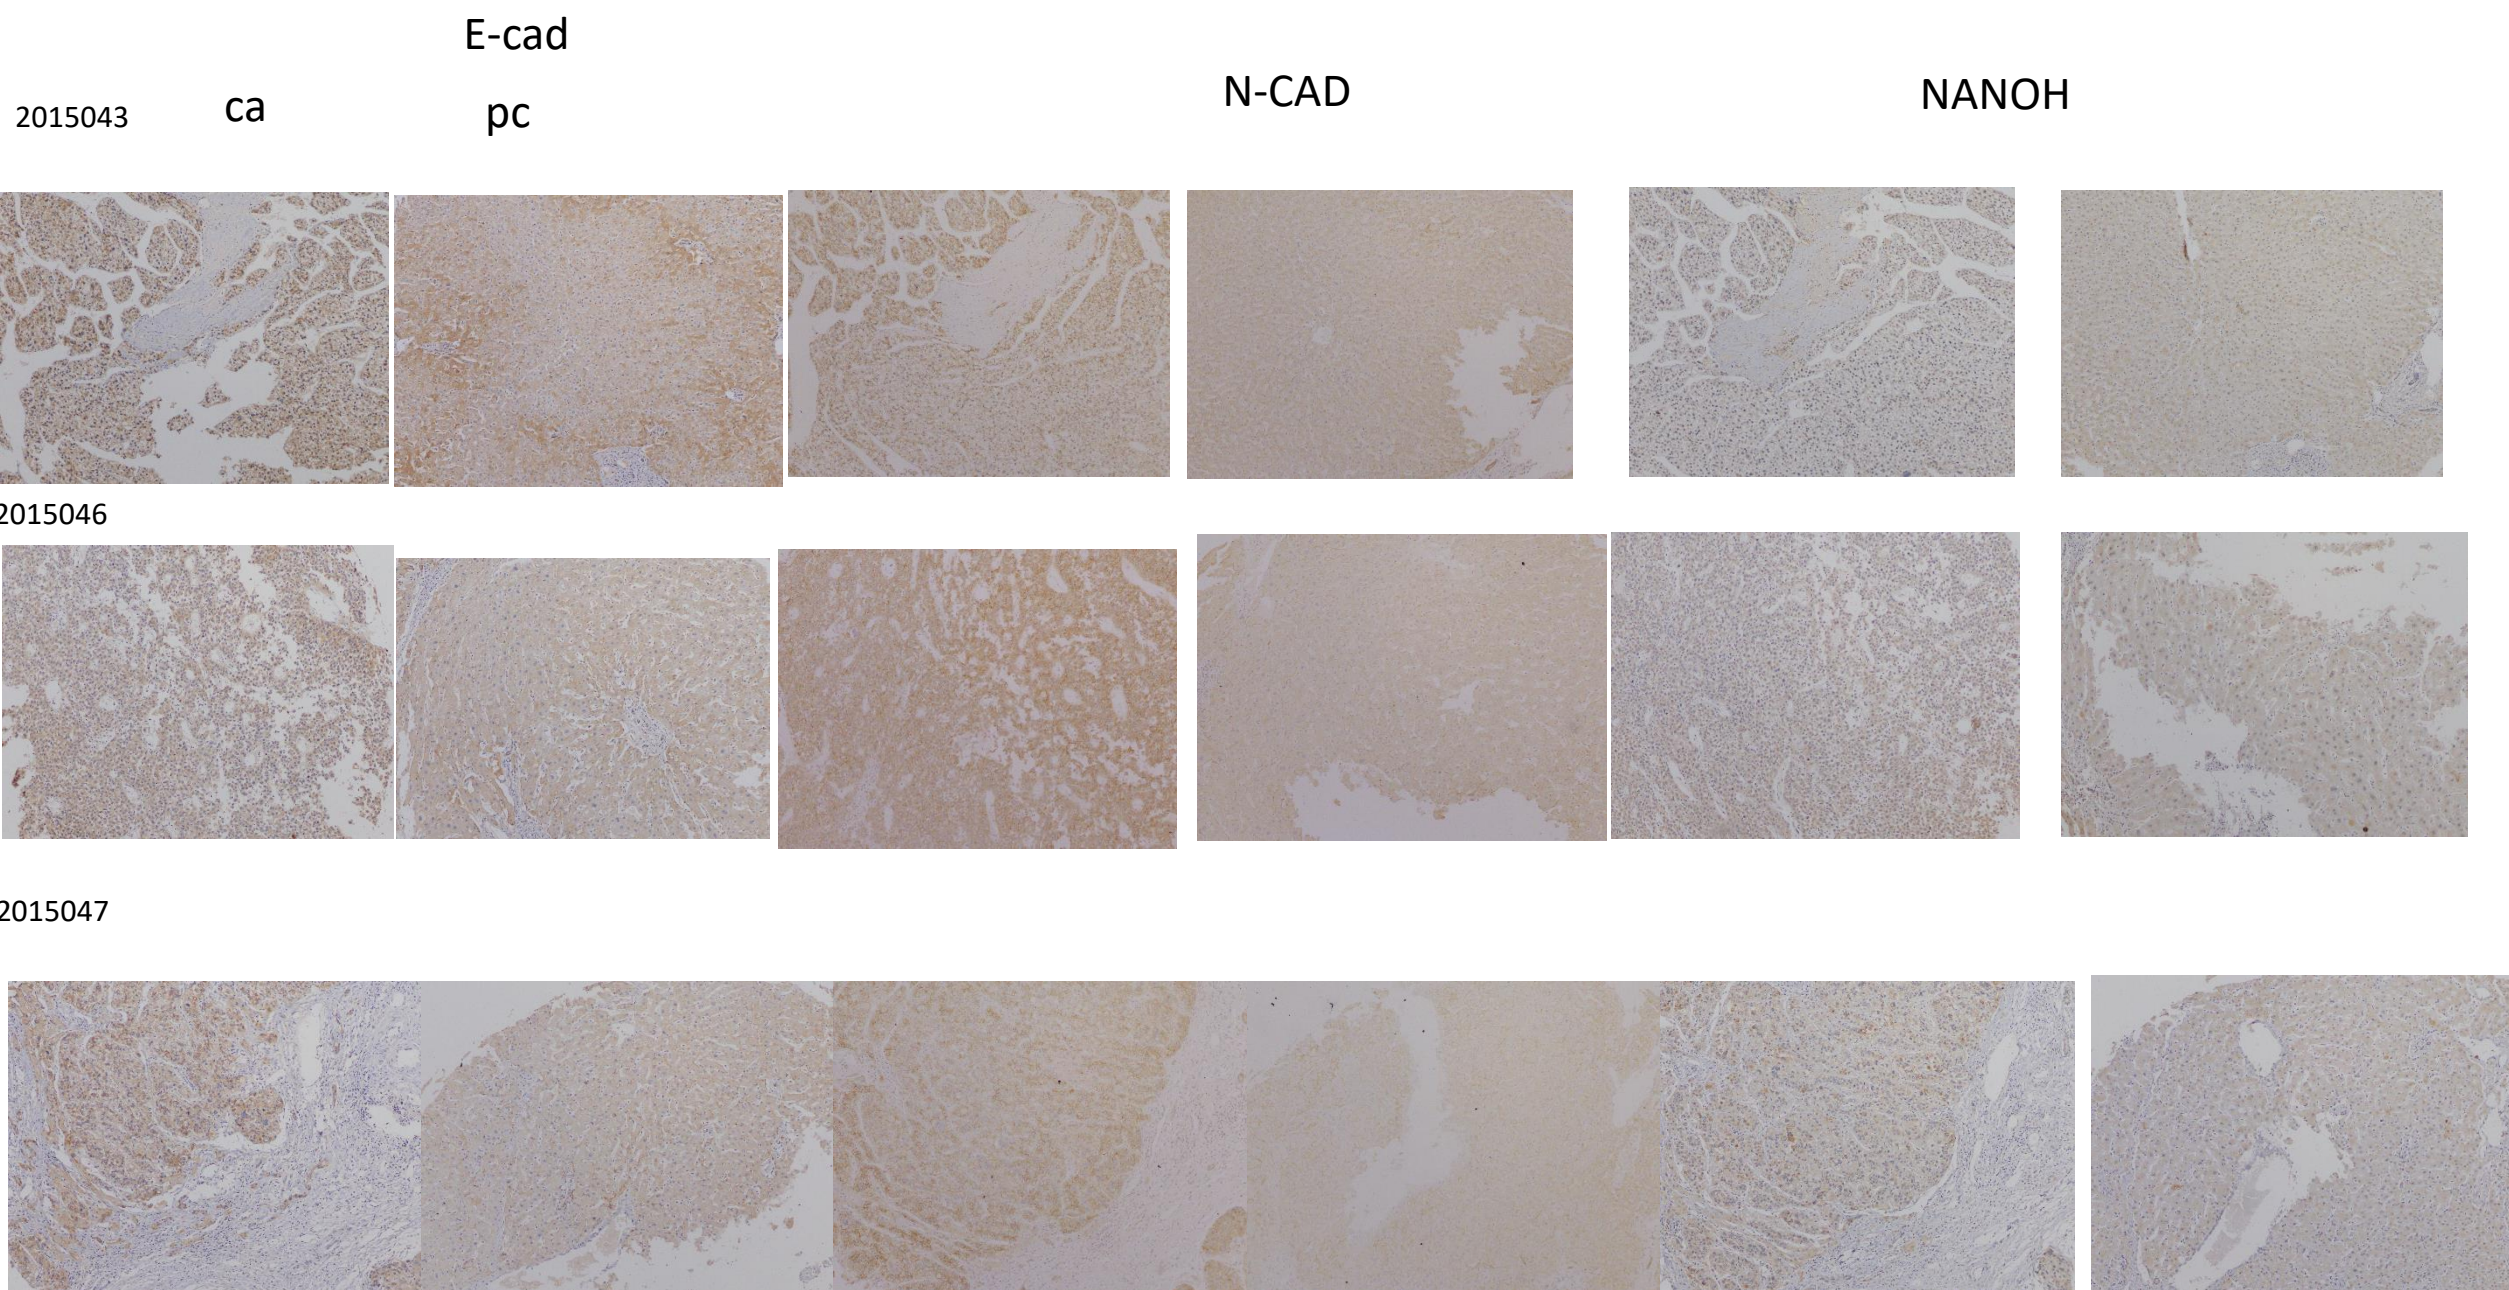

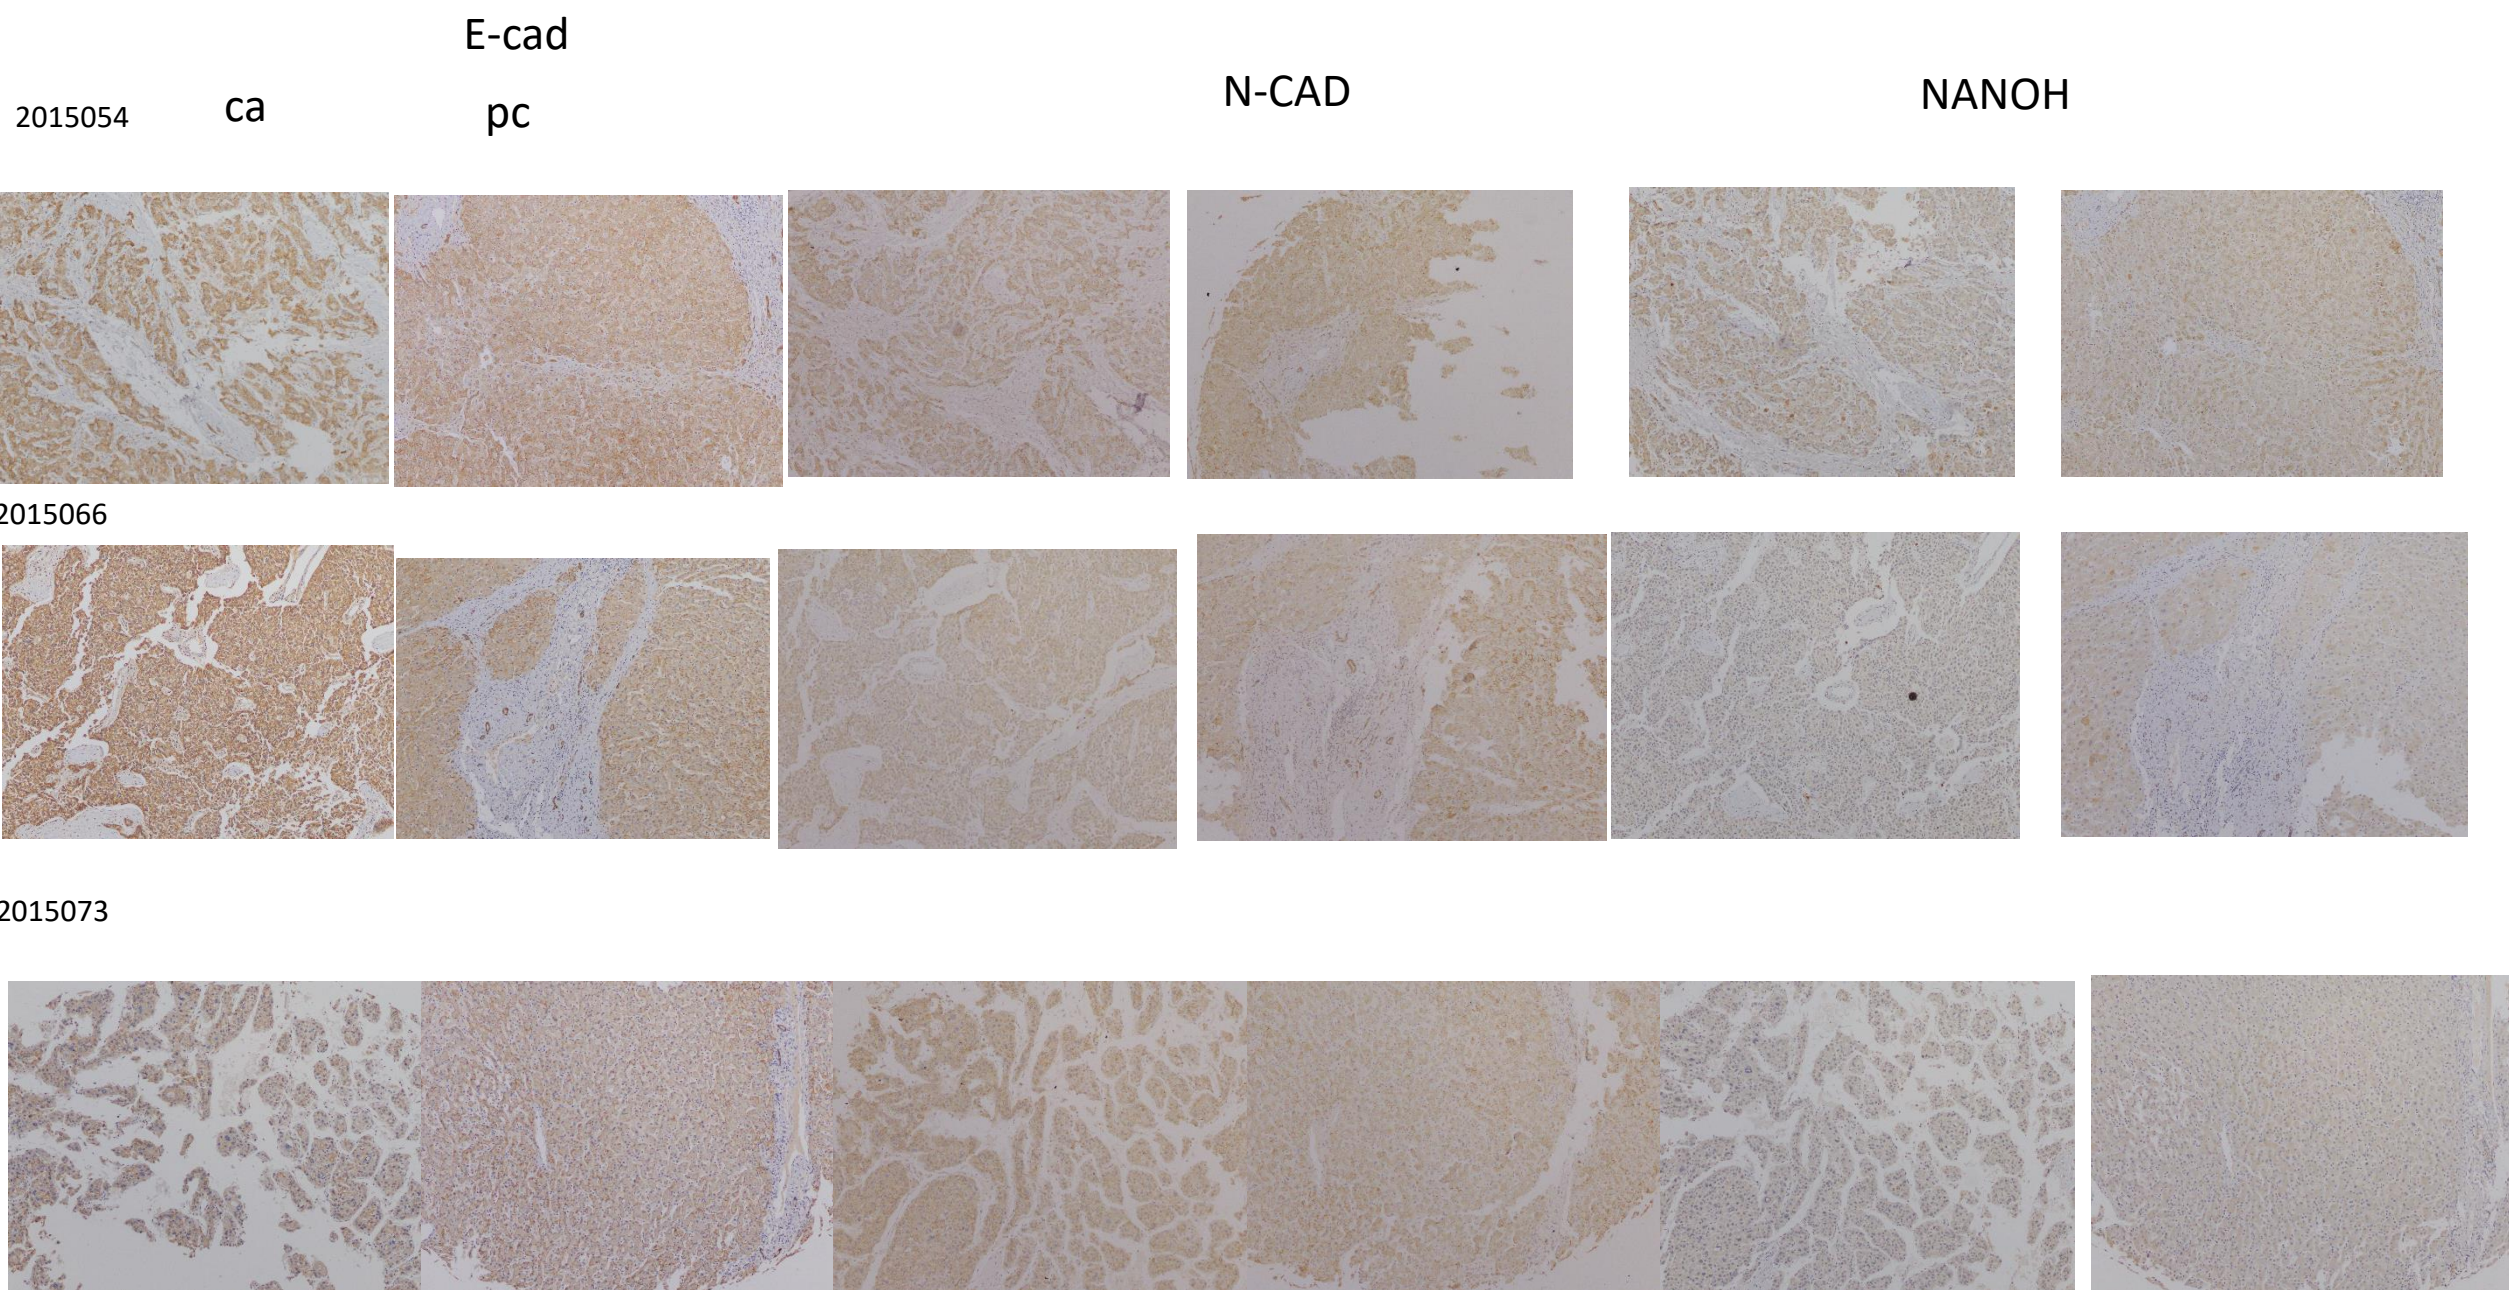

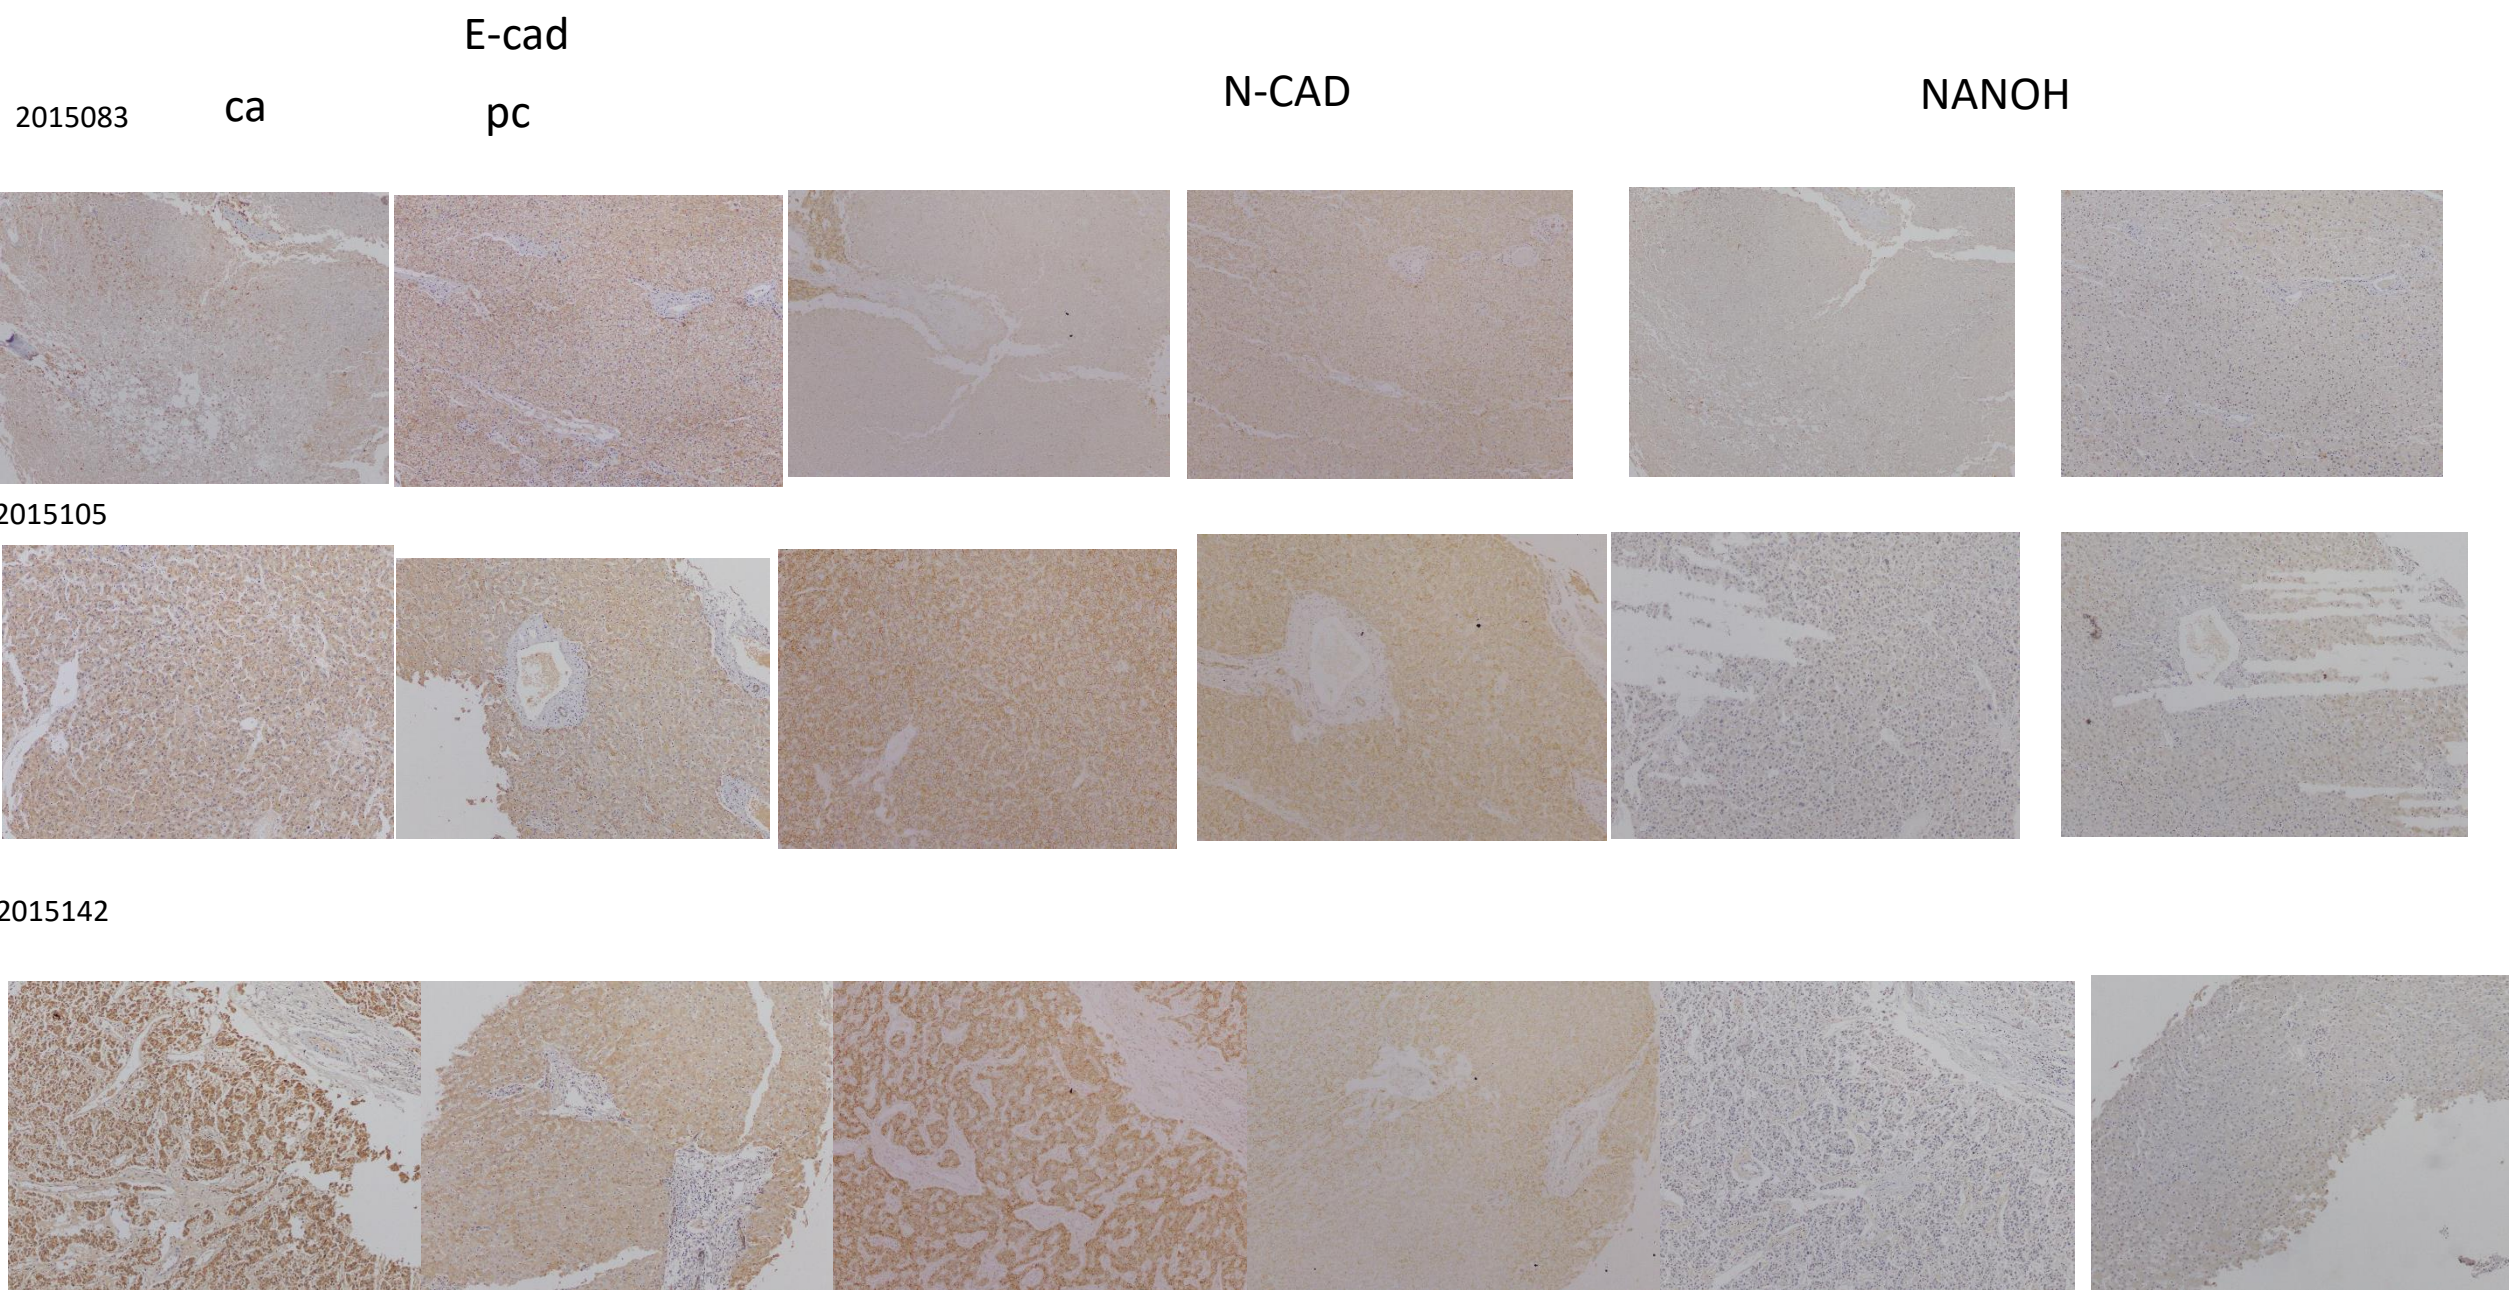

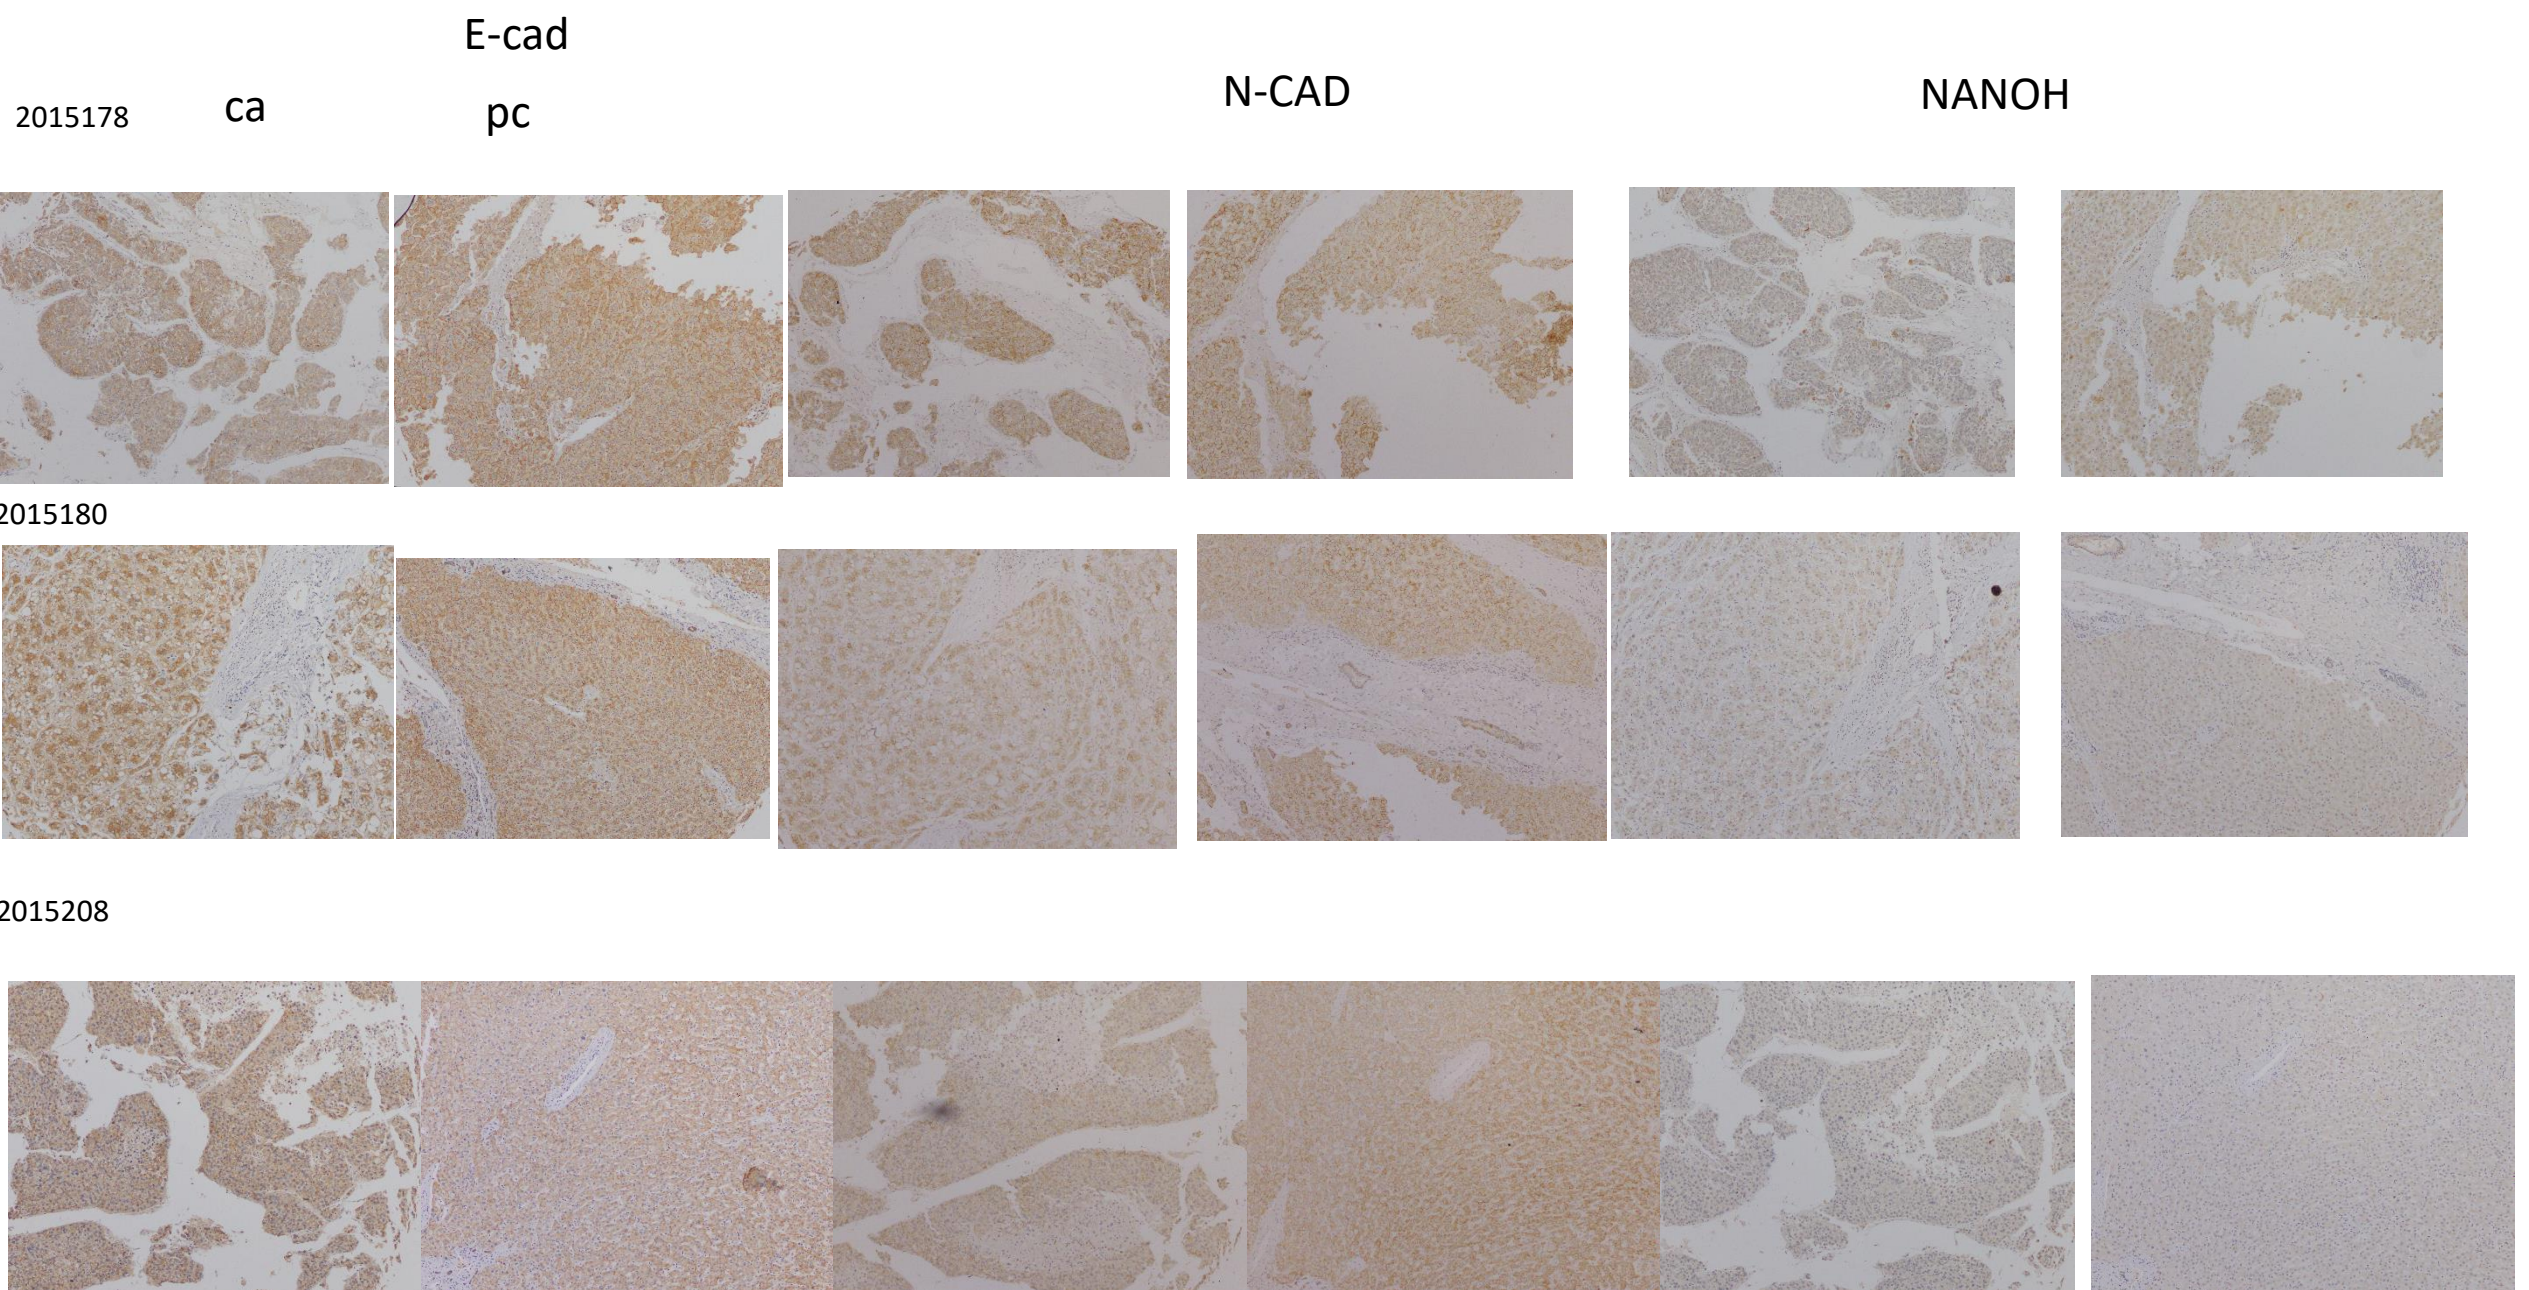

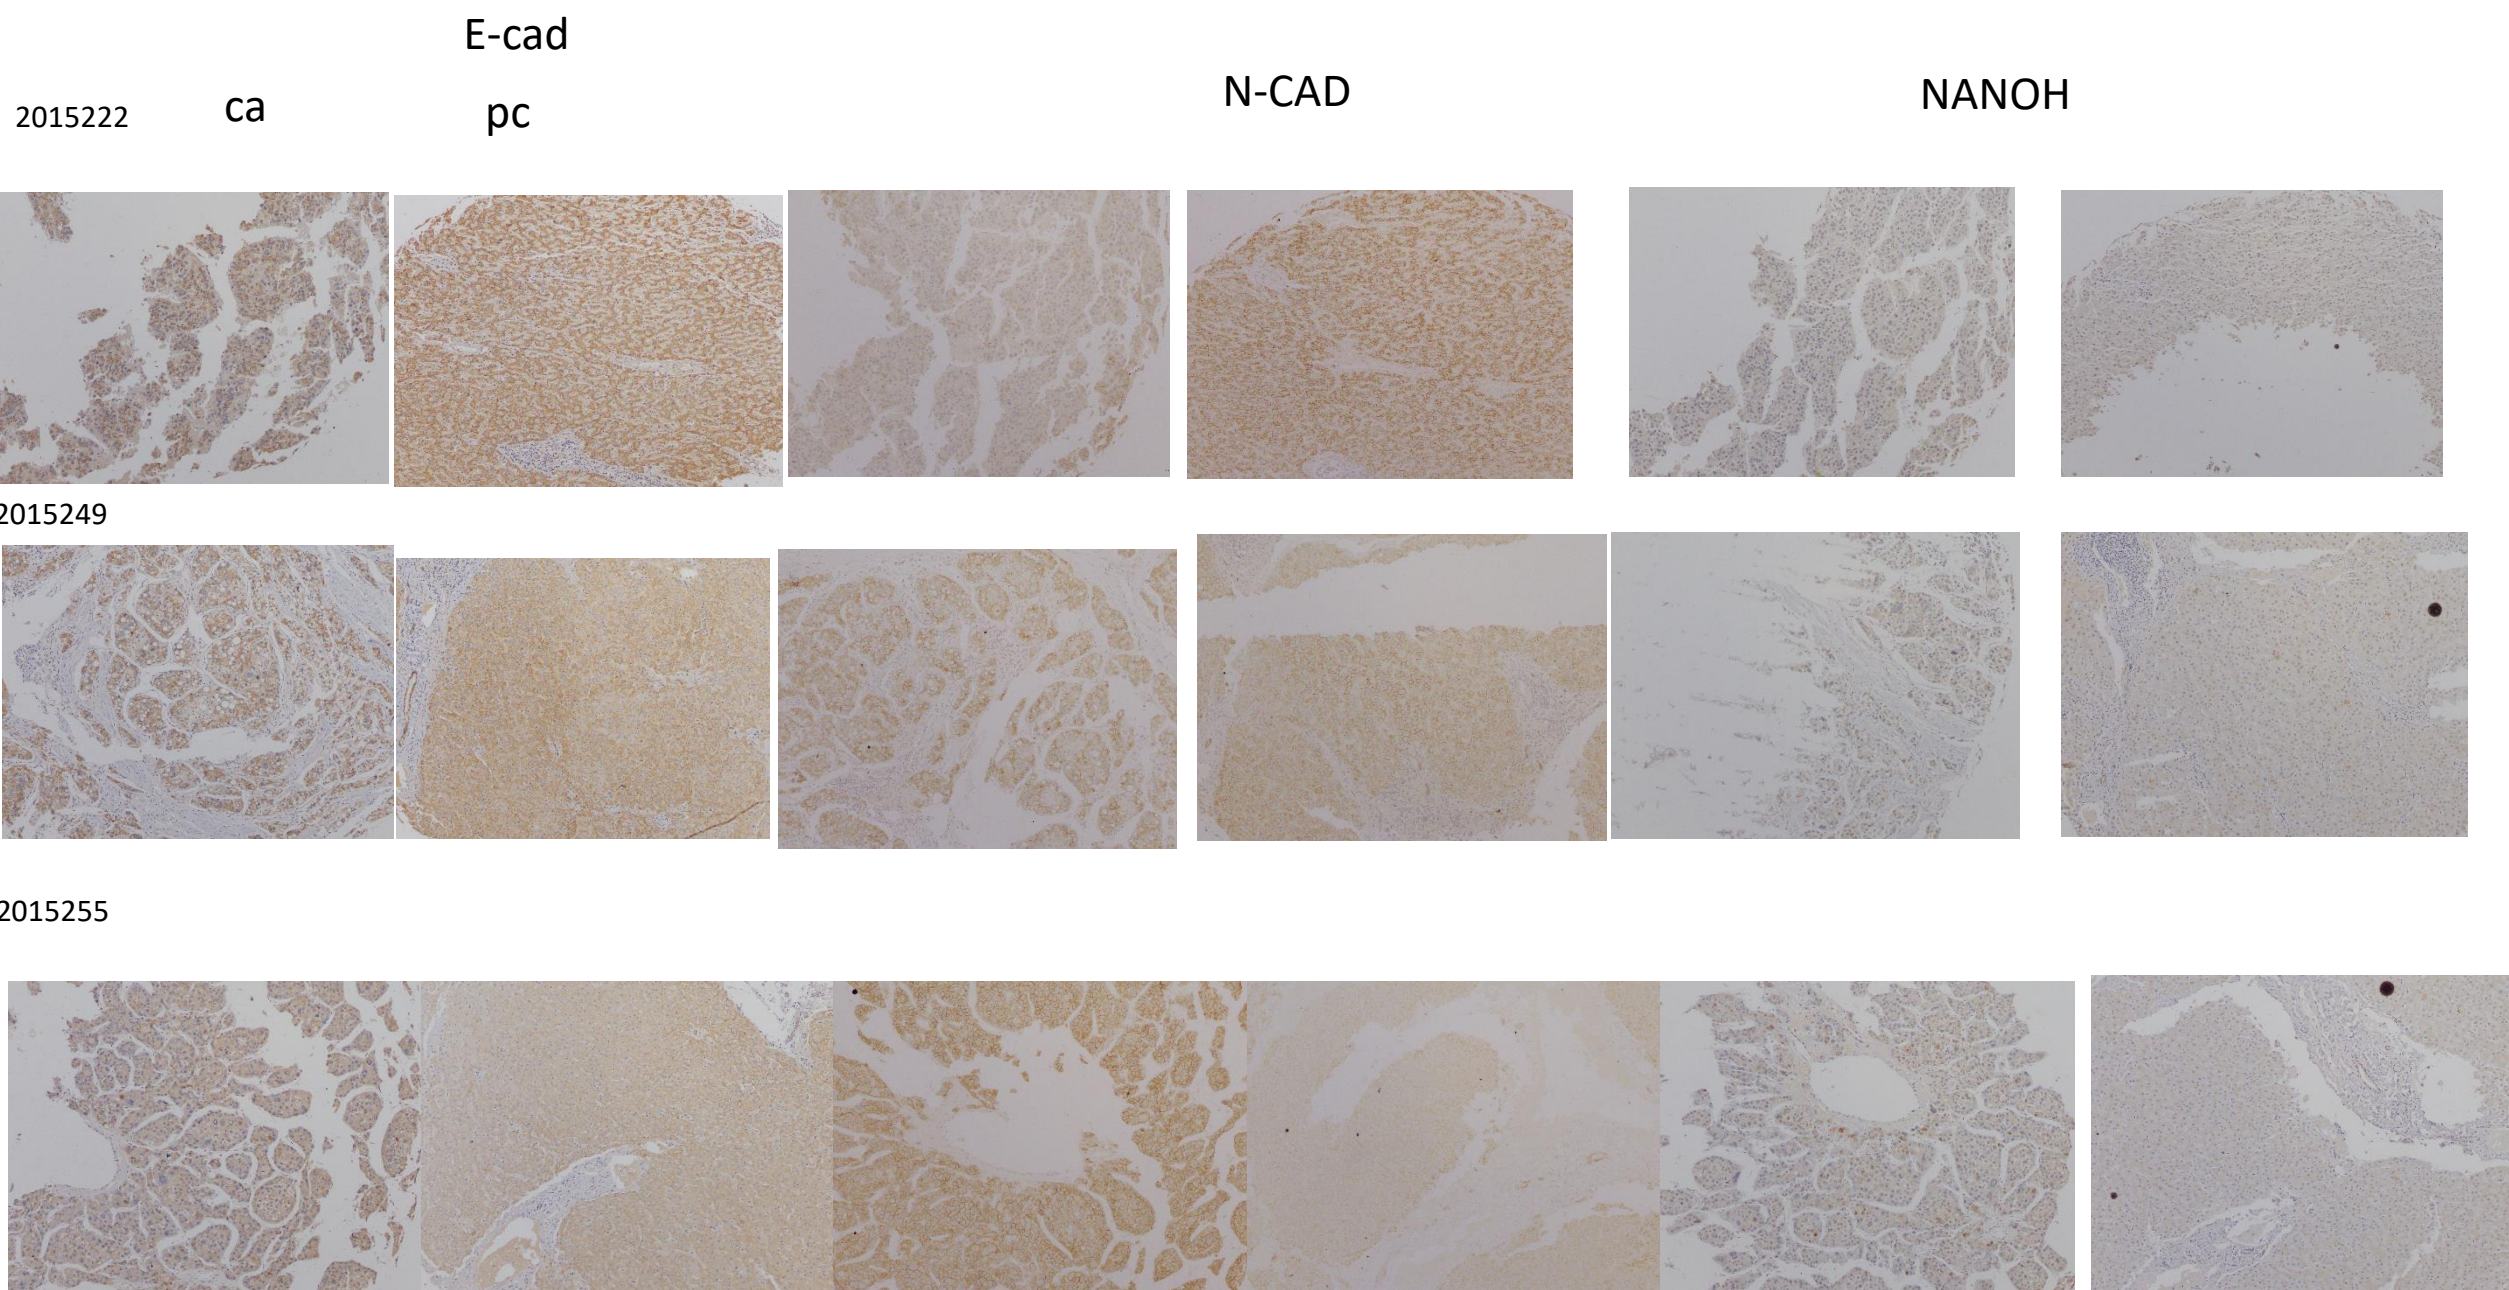

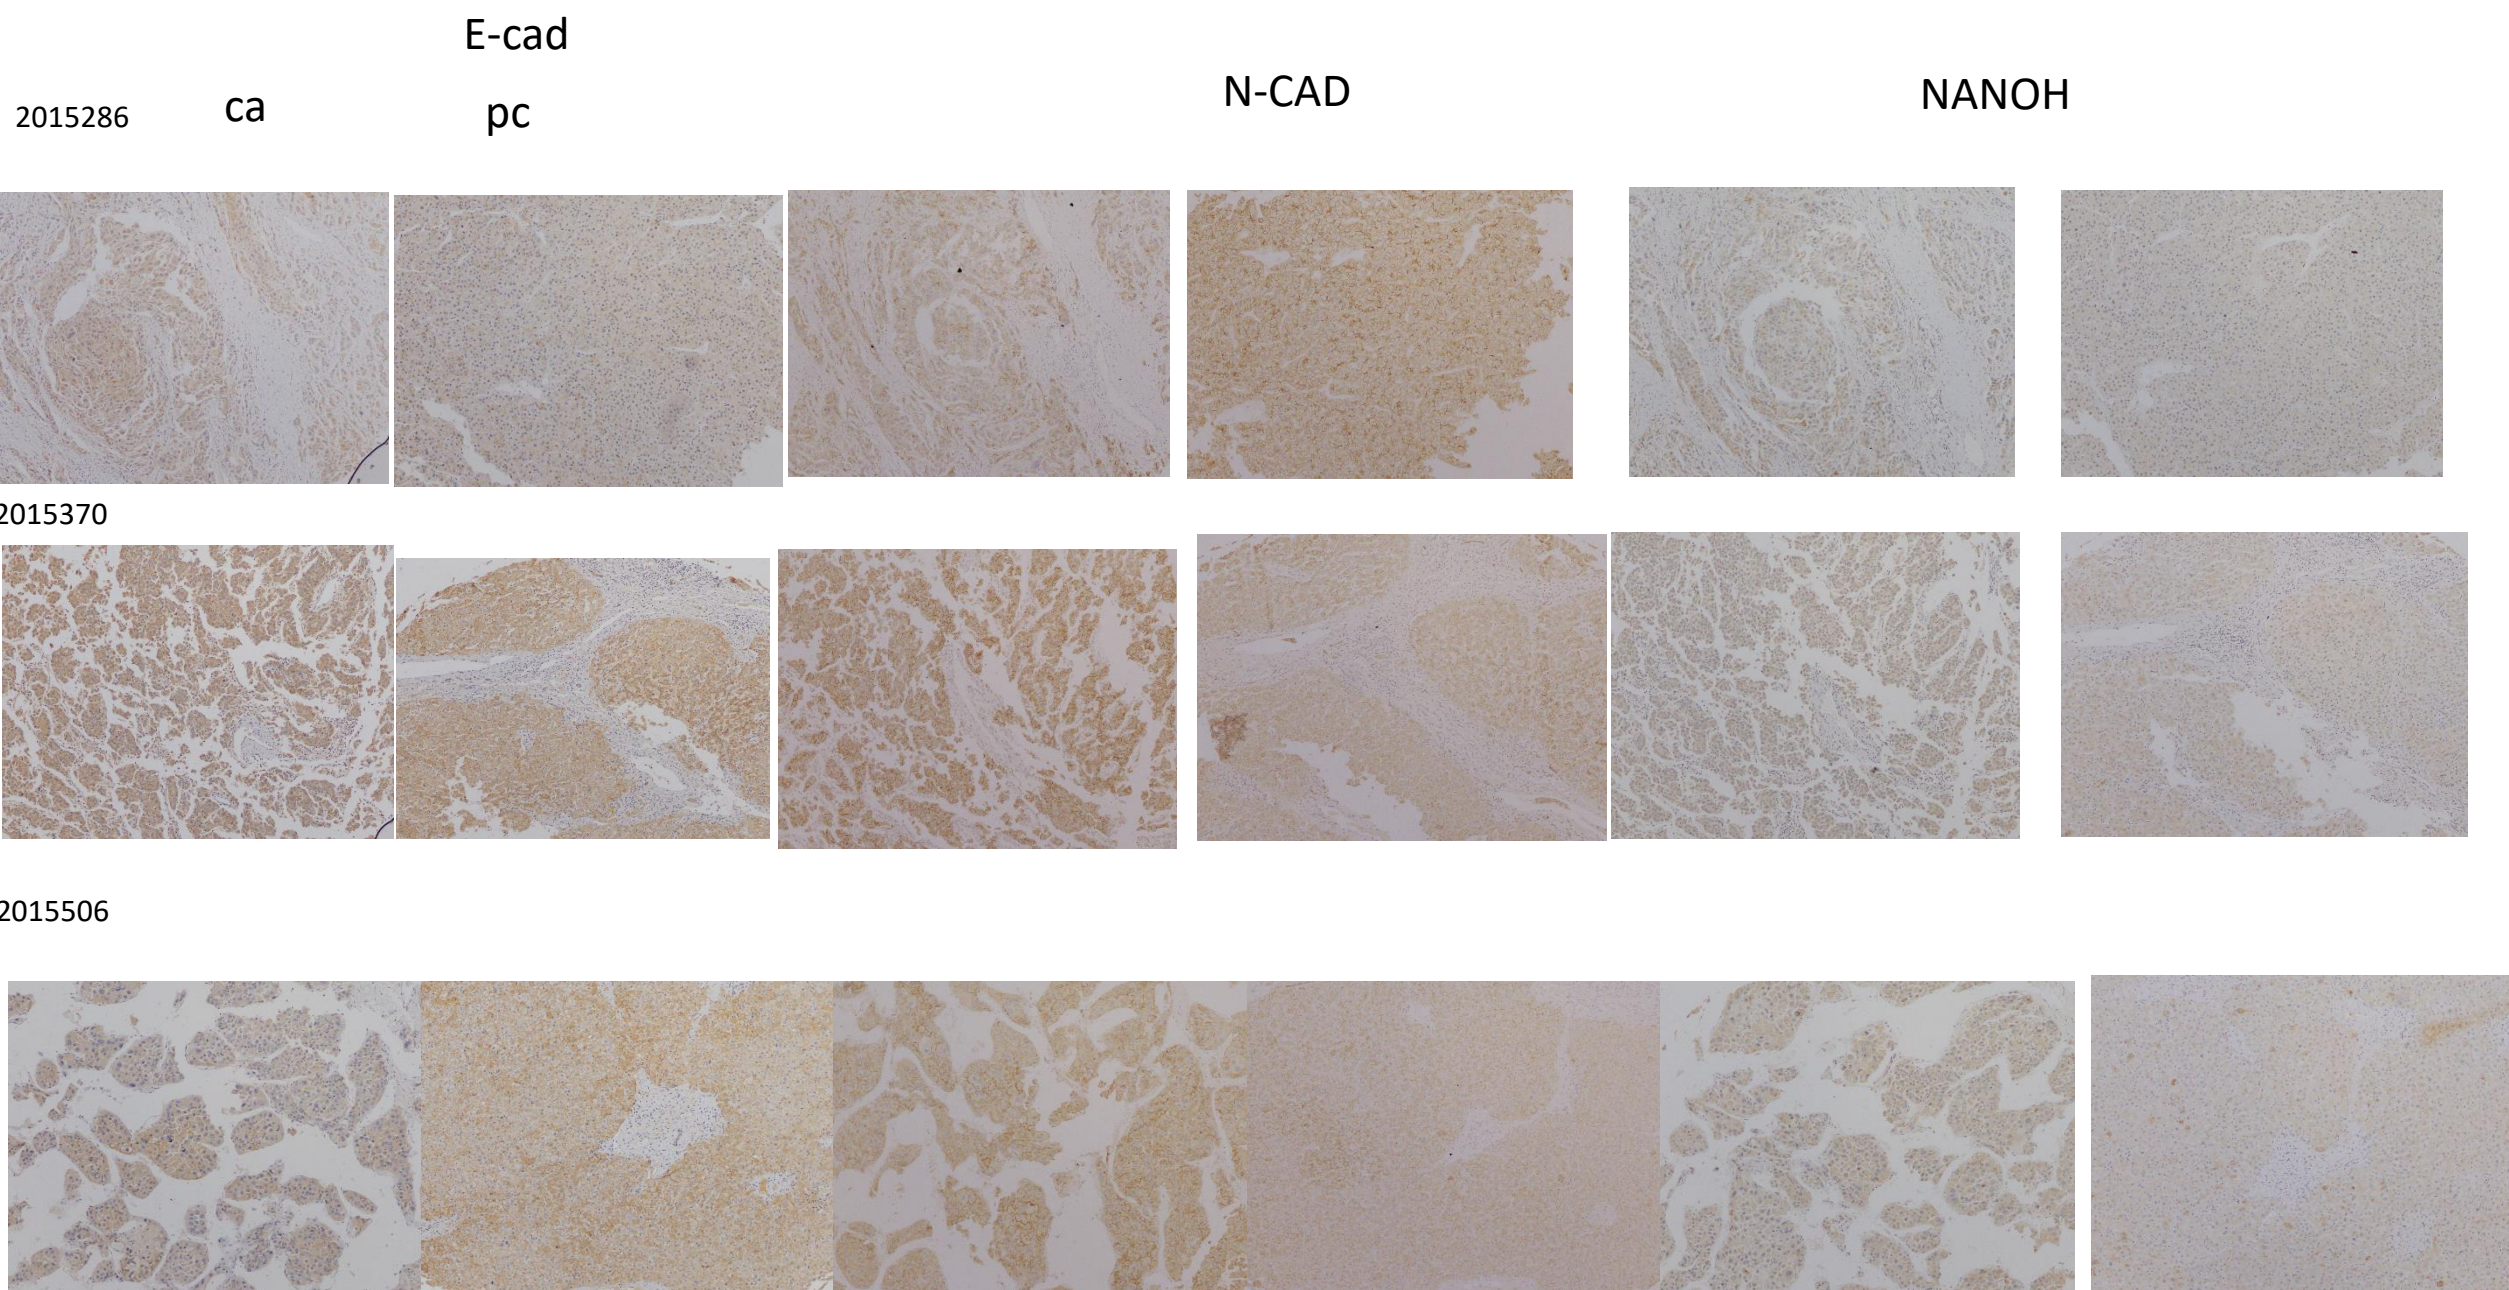

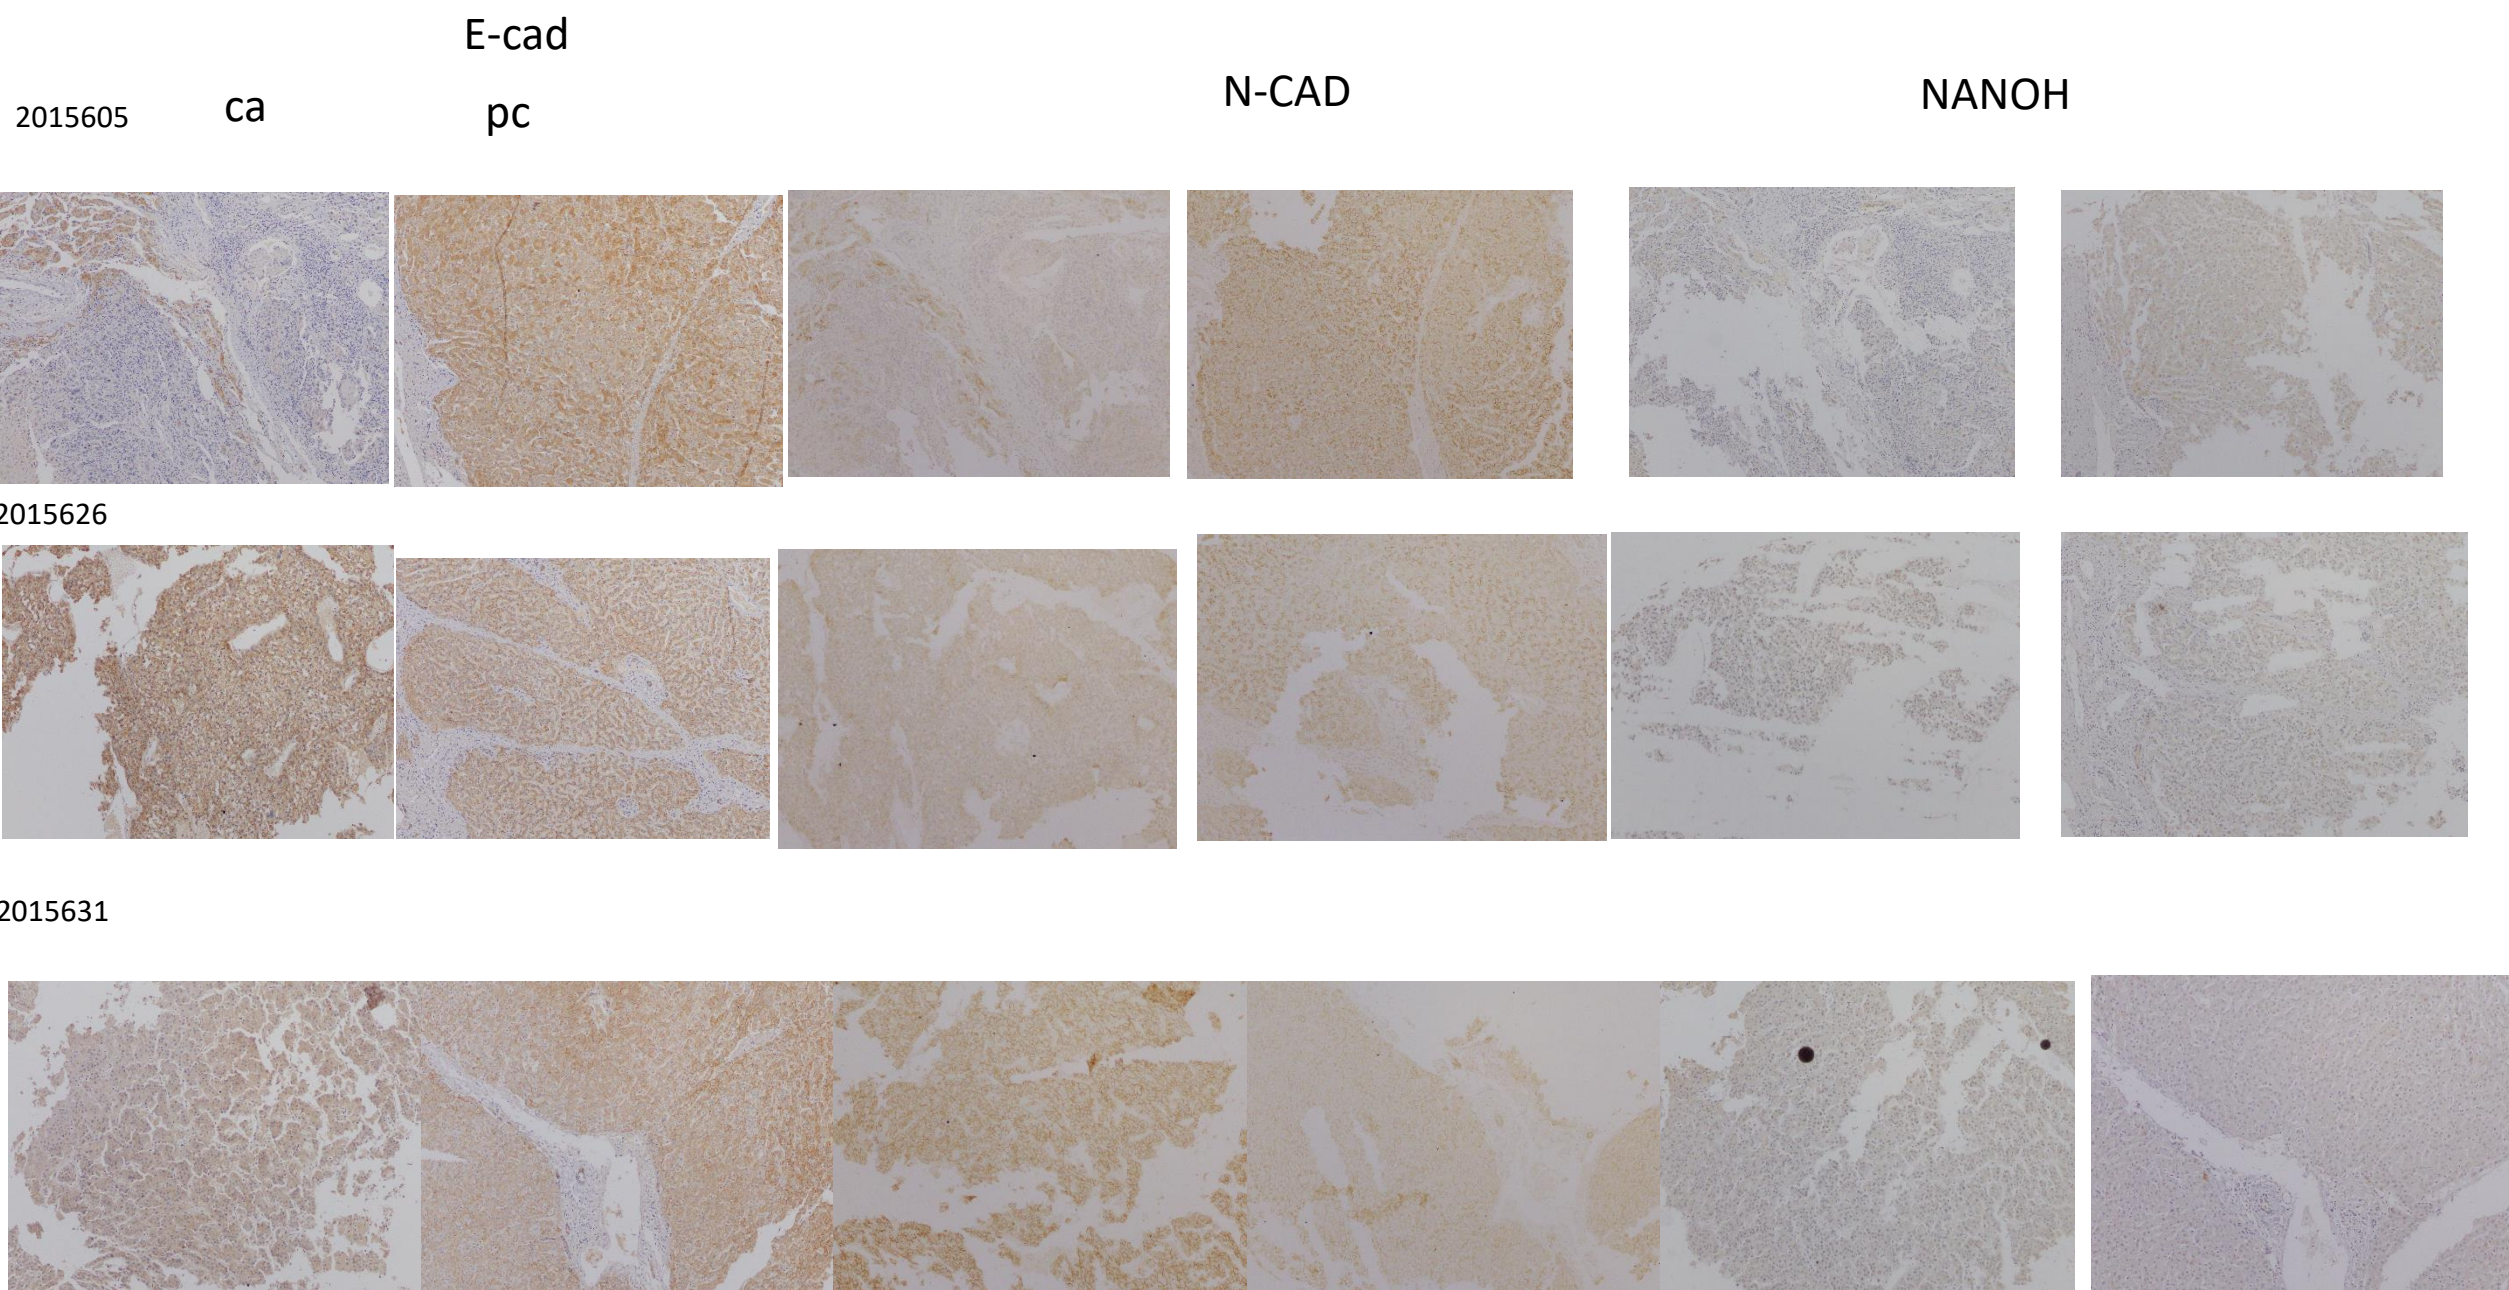

E-cad

n-cad

NANOG

2014072 ca

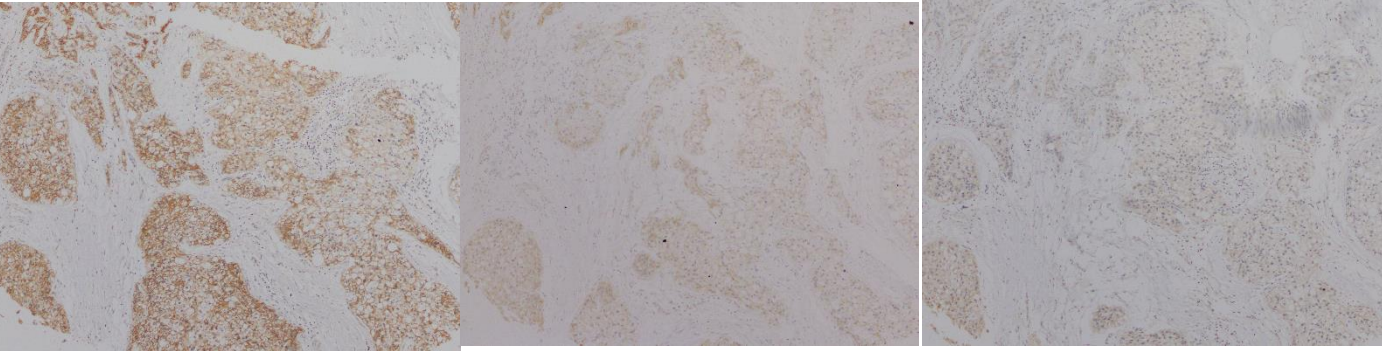

2014908

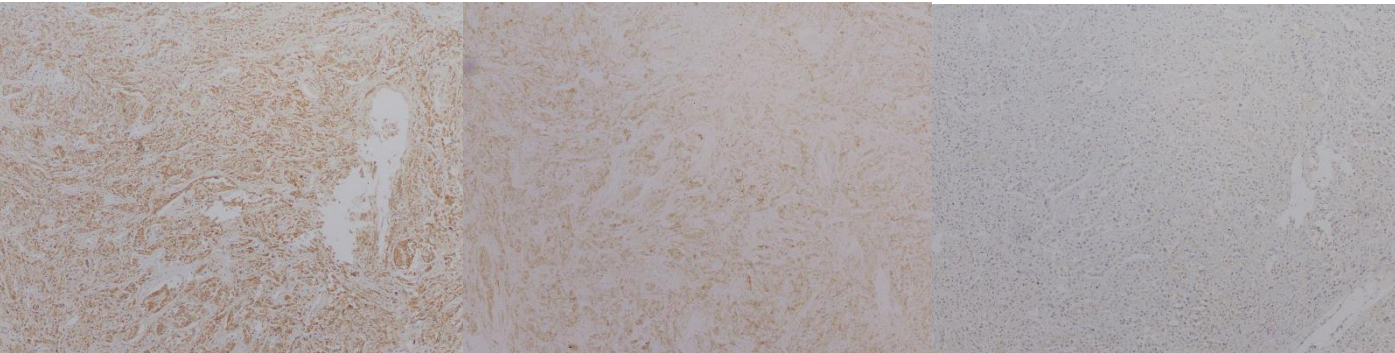

2015028

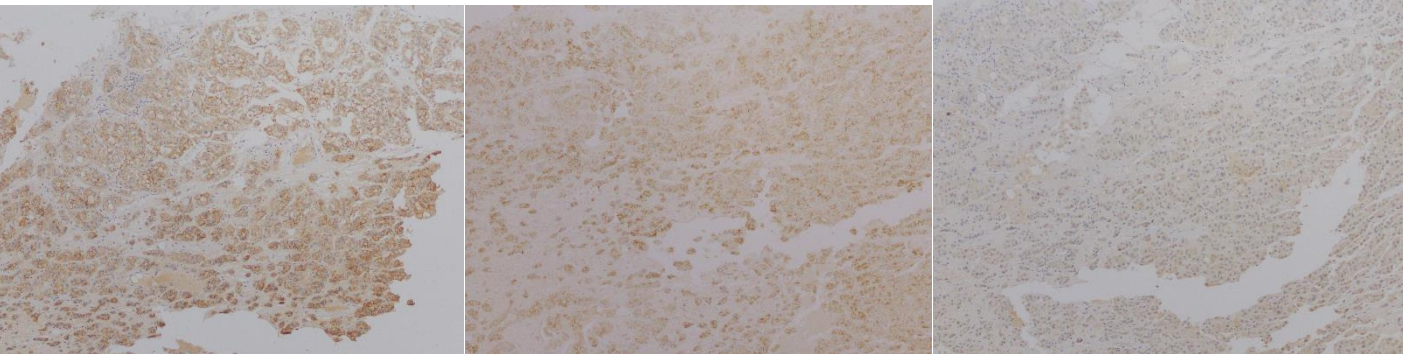



E-cad

n-cad

NANOG

2015079 Ca

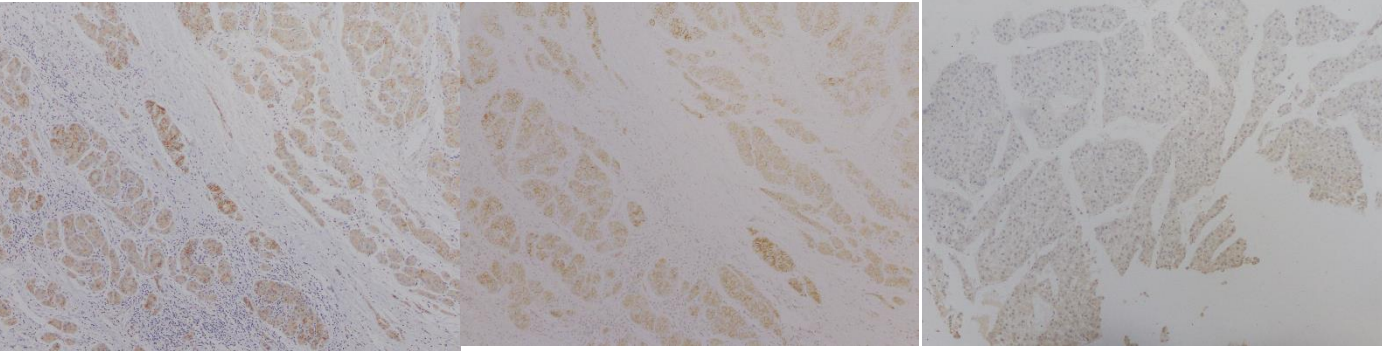

2015096

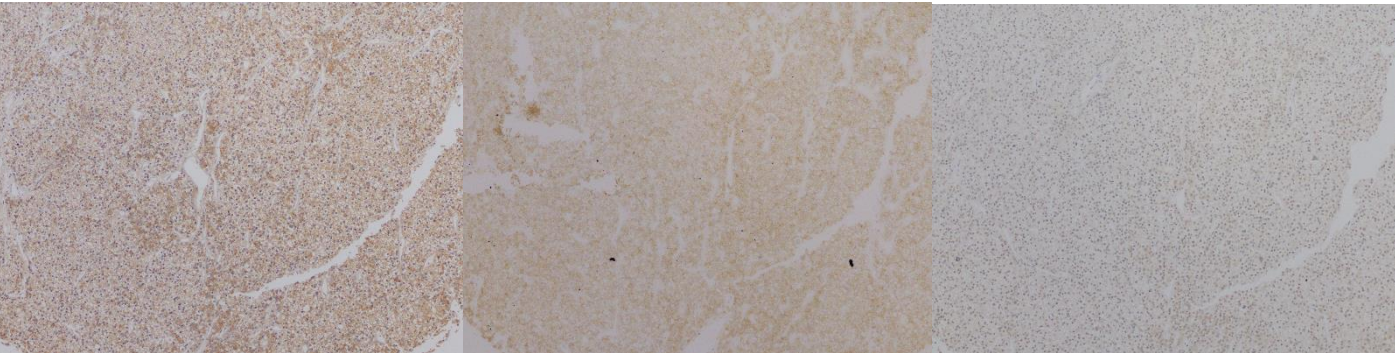

2015150

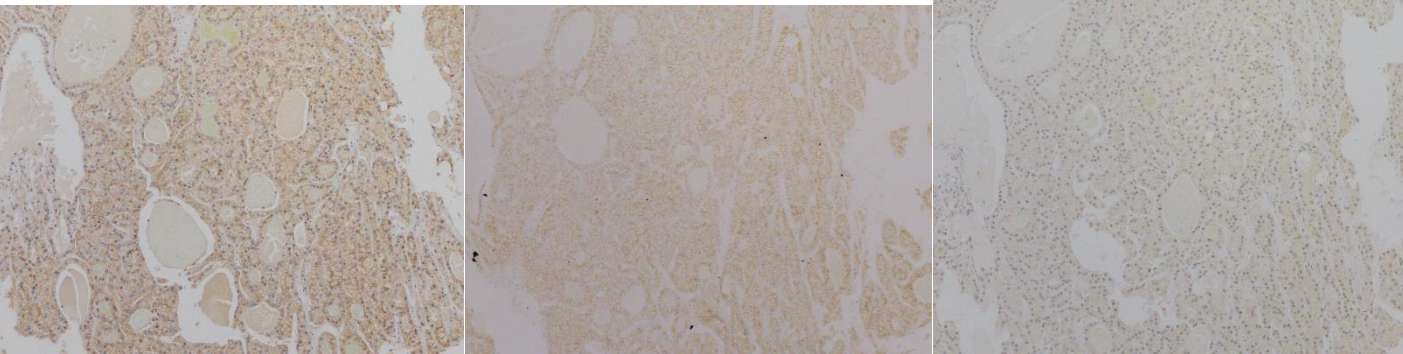

E-cad

n-cad

NANOG

2015153 ca

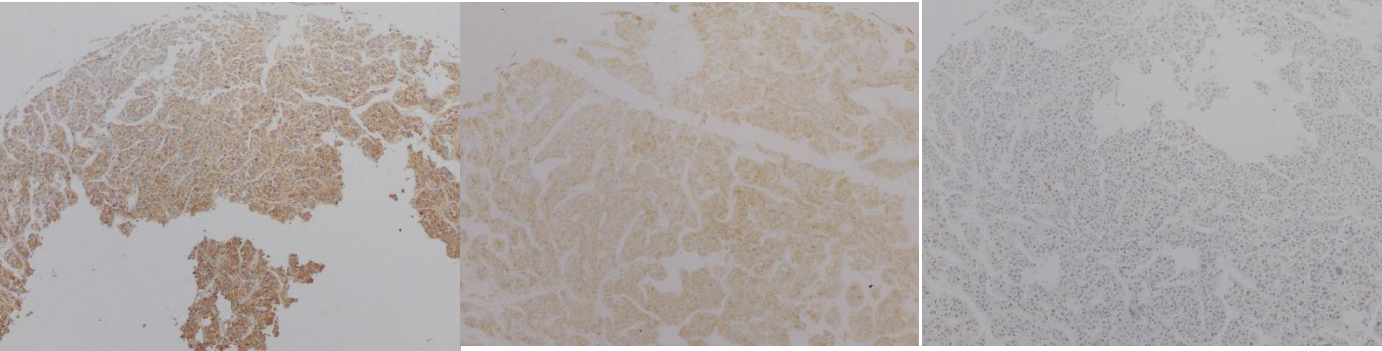

2015156

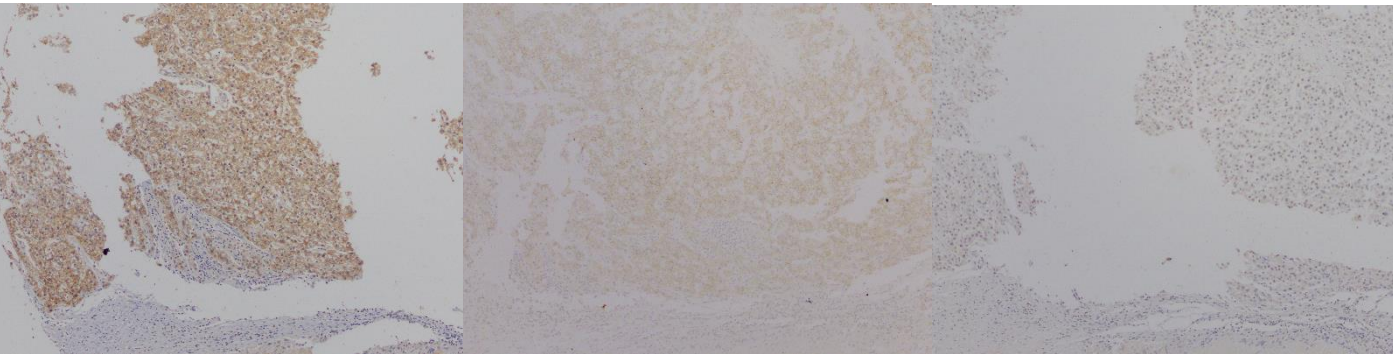

2015164

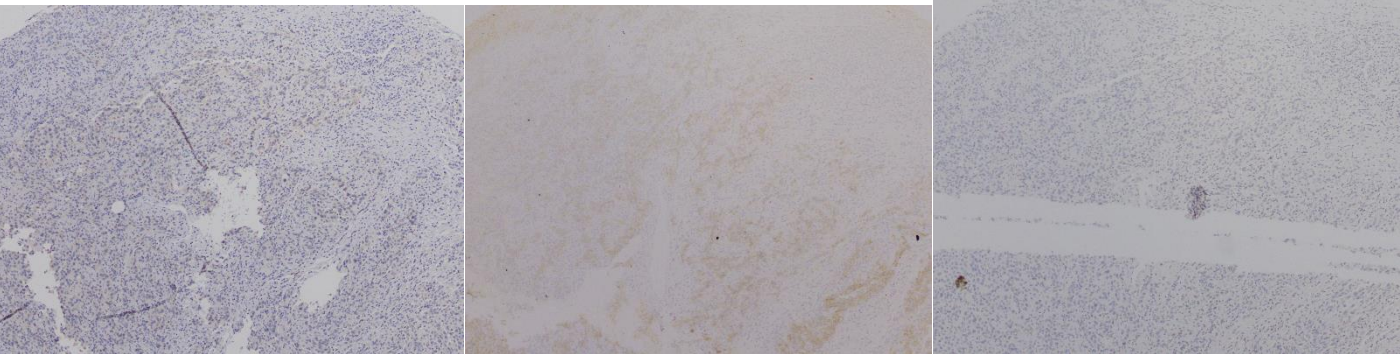

E-cad

n-cad

NANOG

2015213 Ca

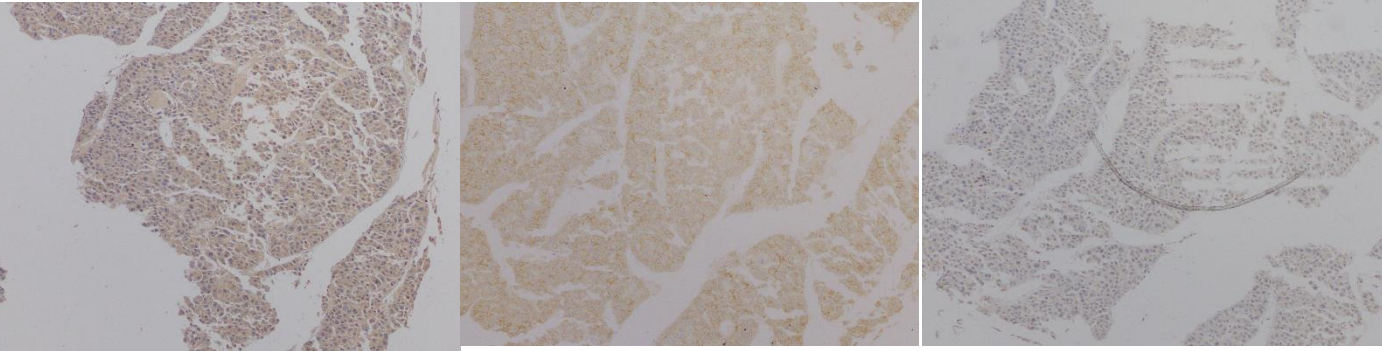

2015237

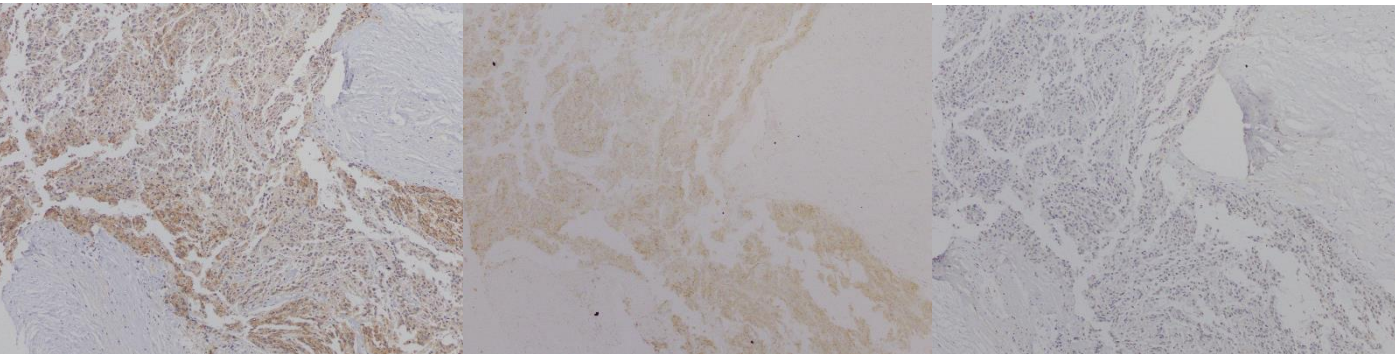

2015276

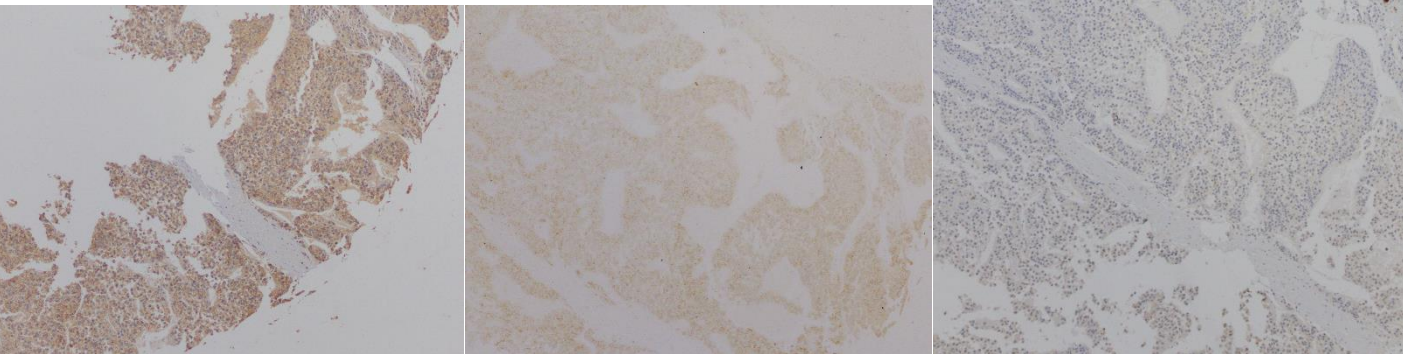

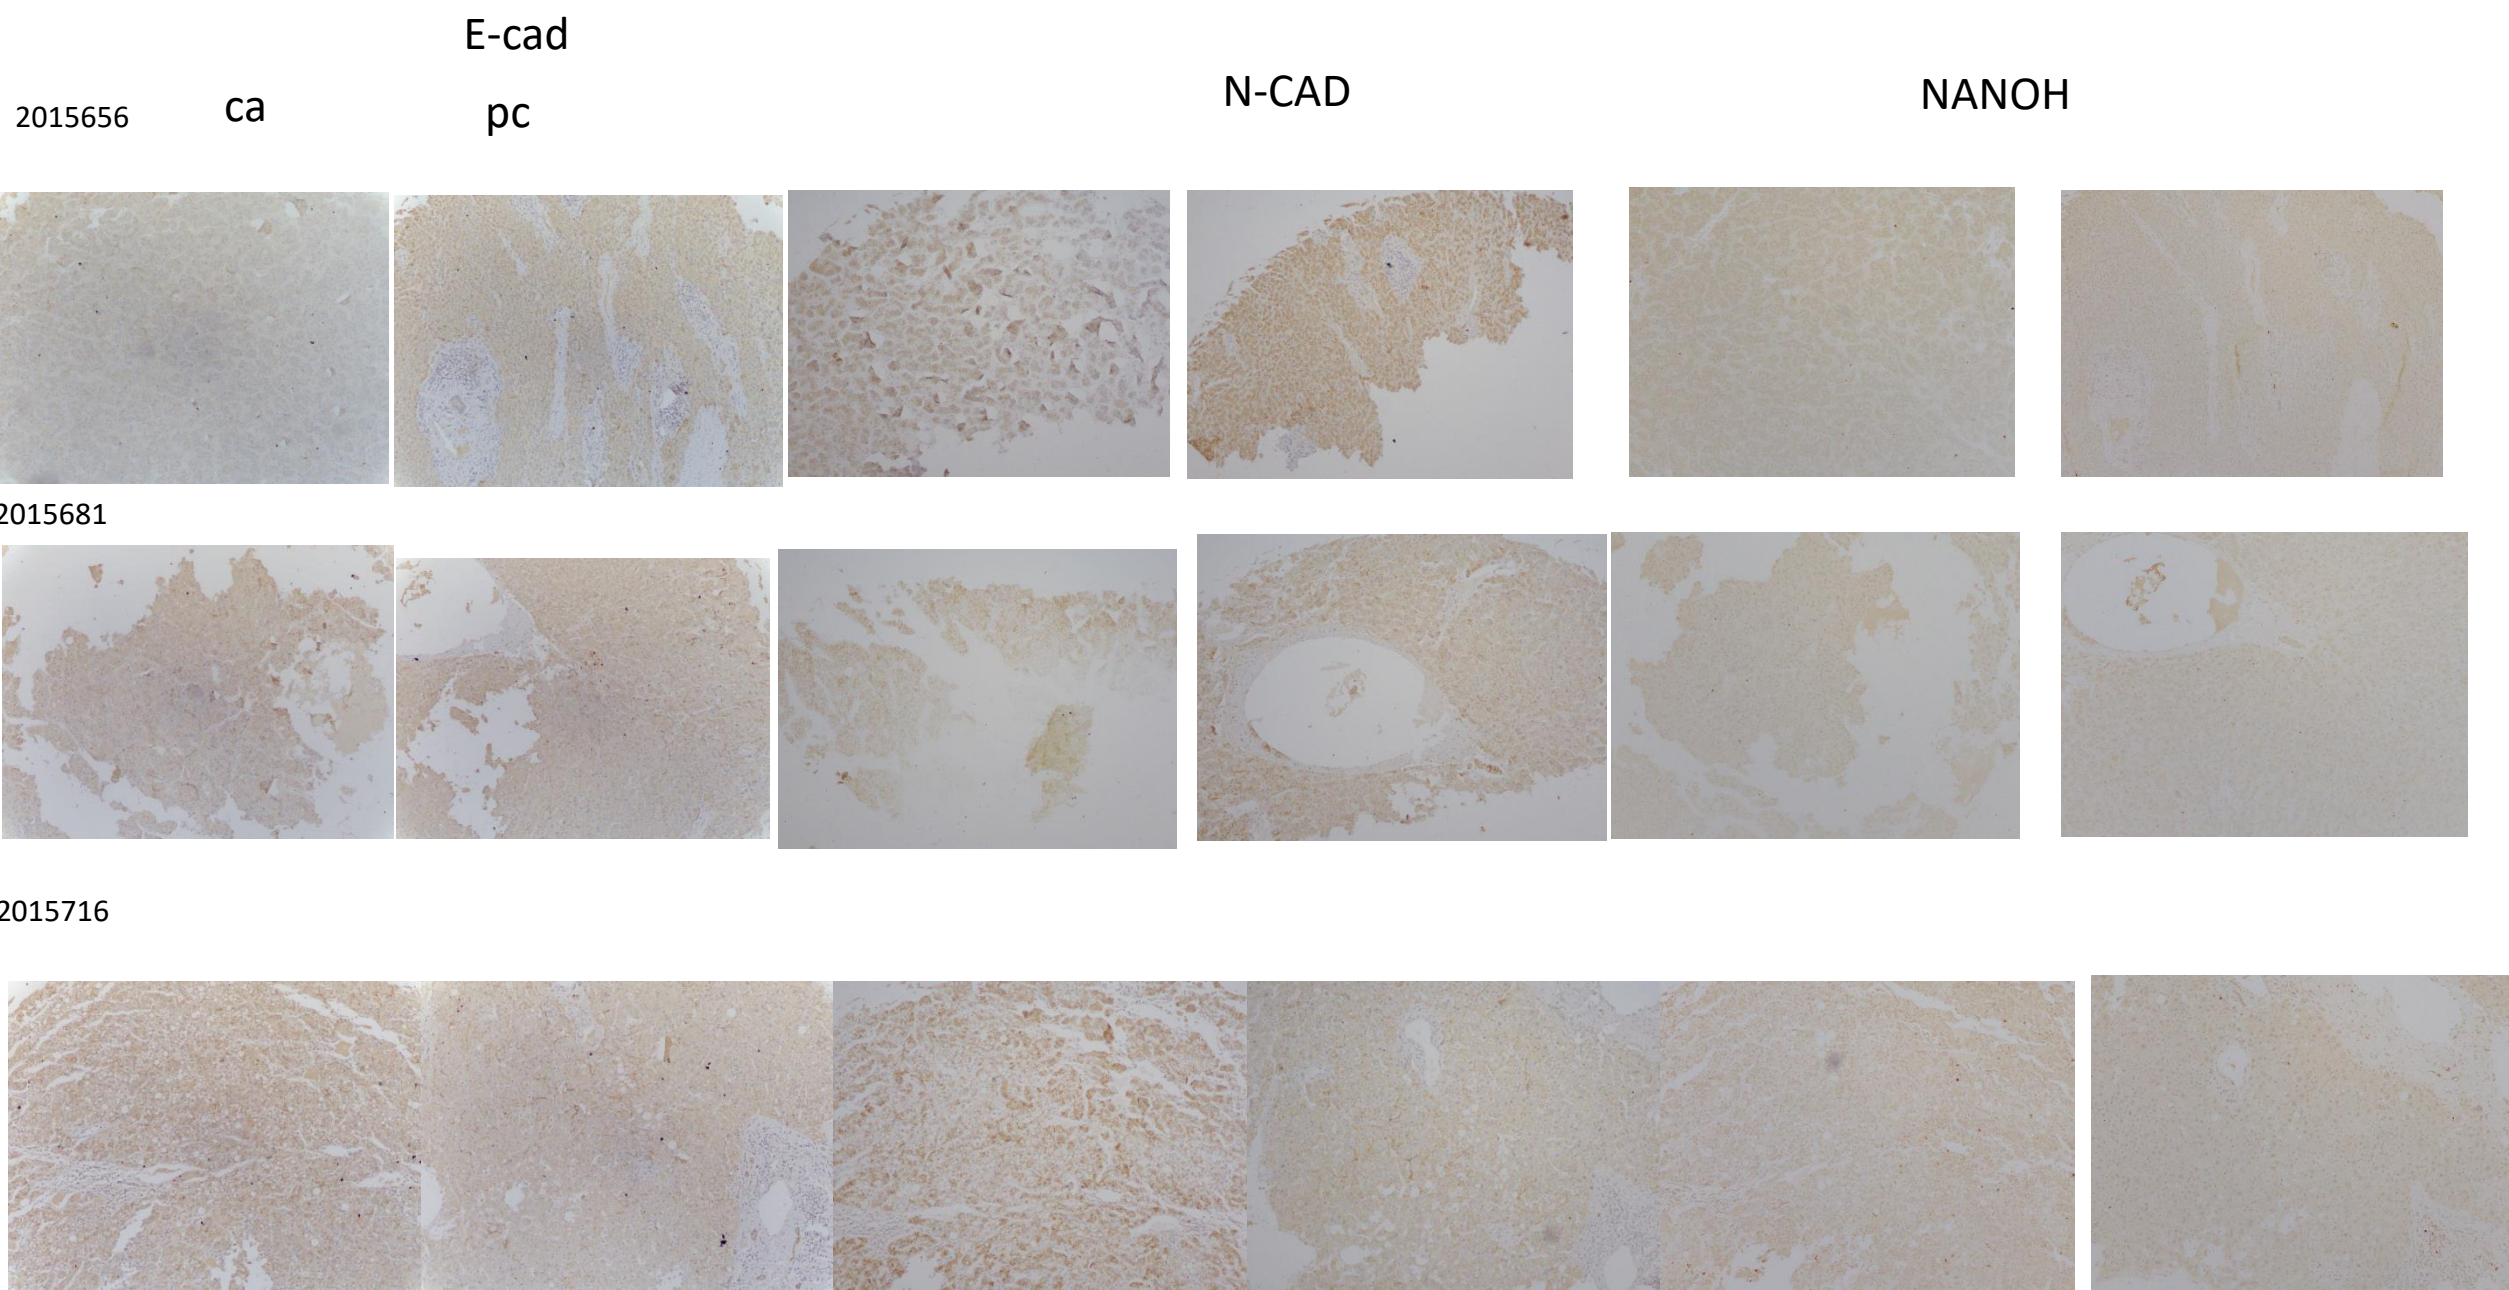

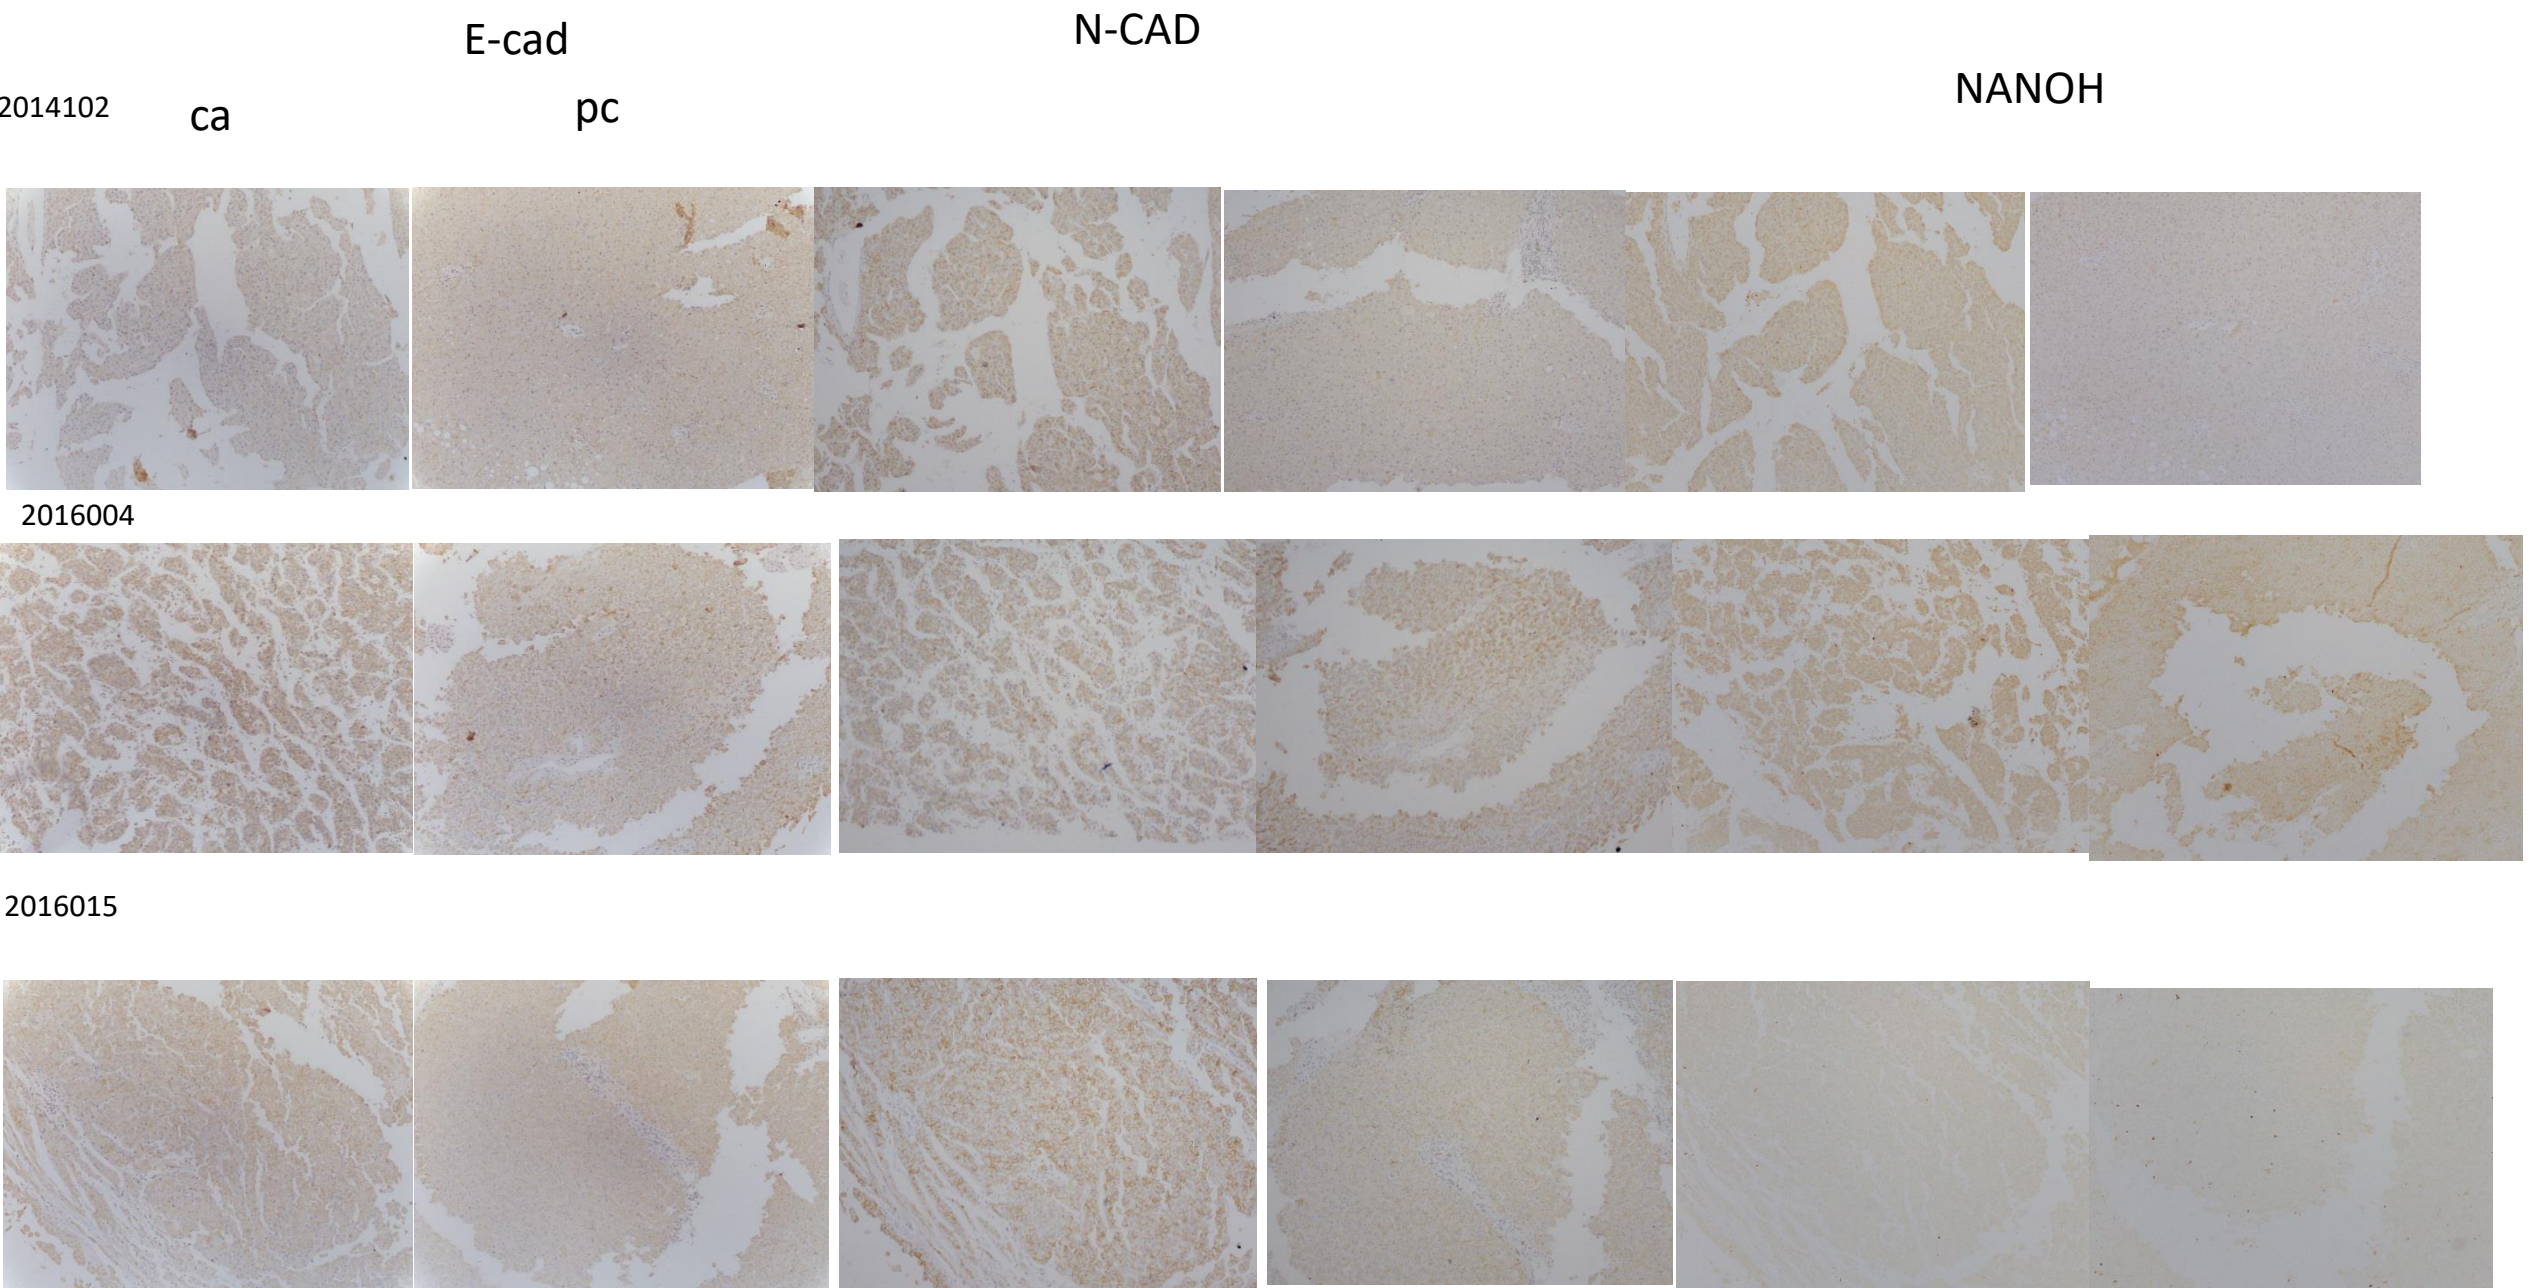

2016017 ca

E-cad  
pc

N-CAD

NANO

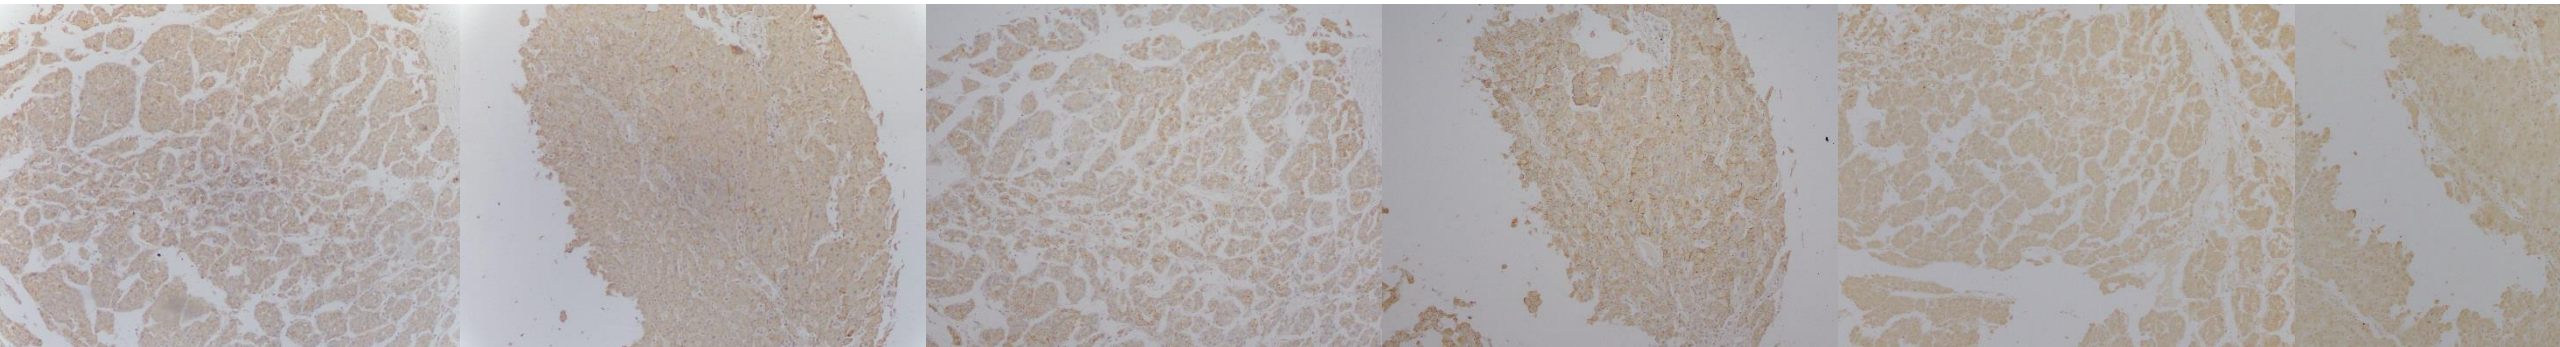

2016030

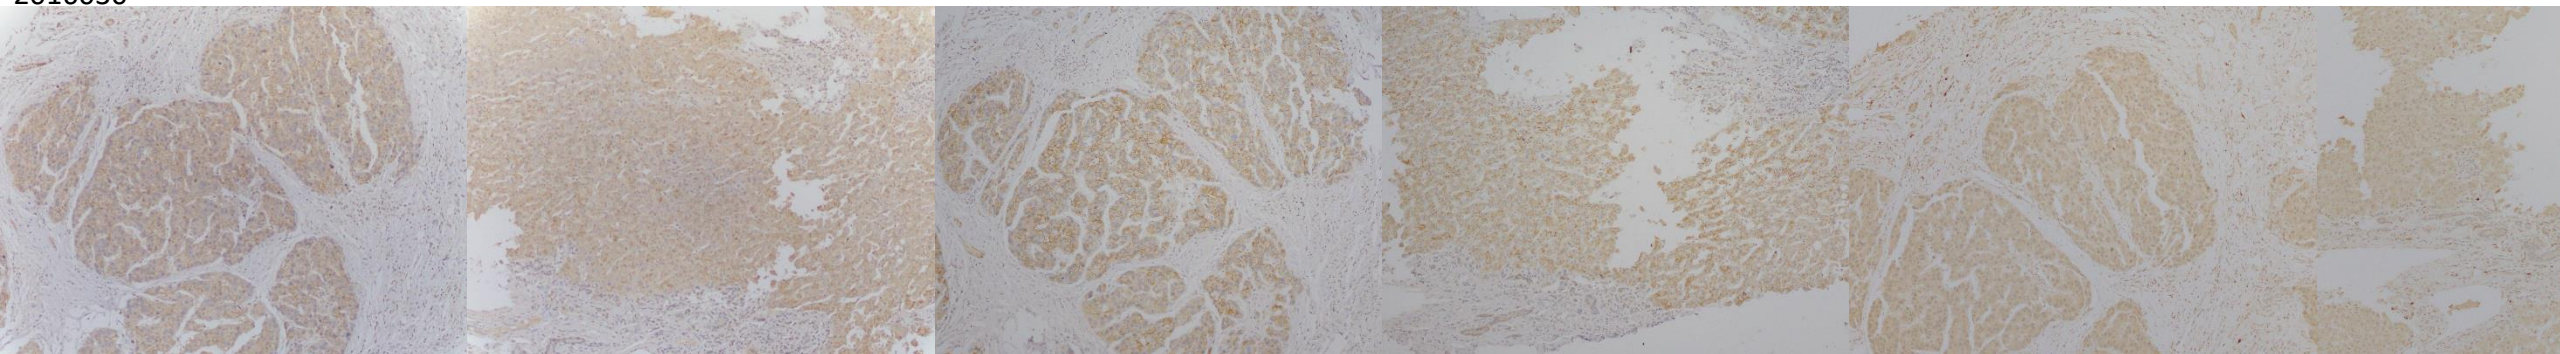

2016032

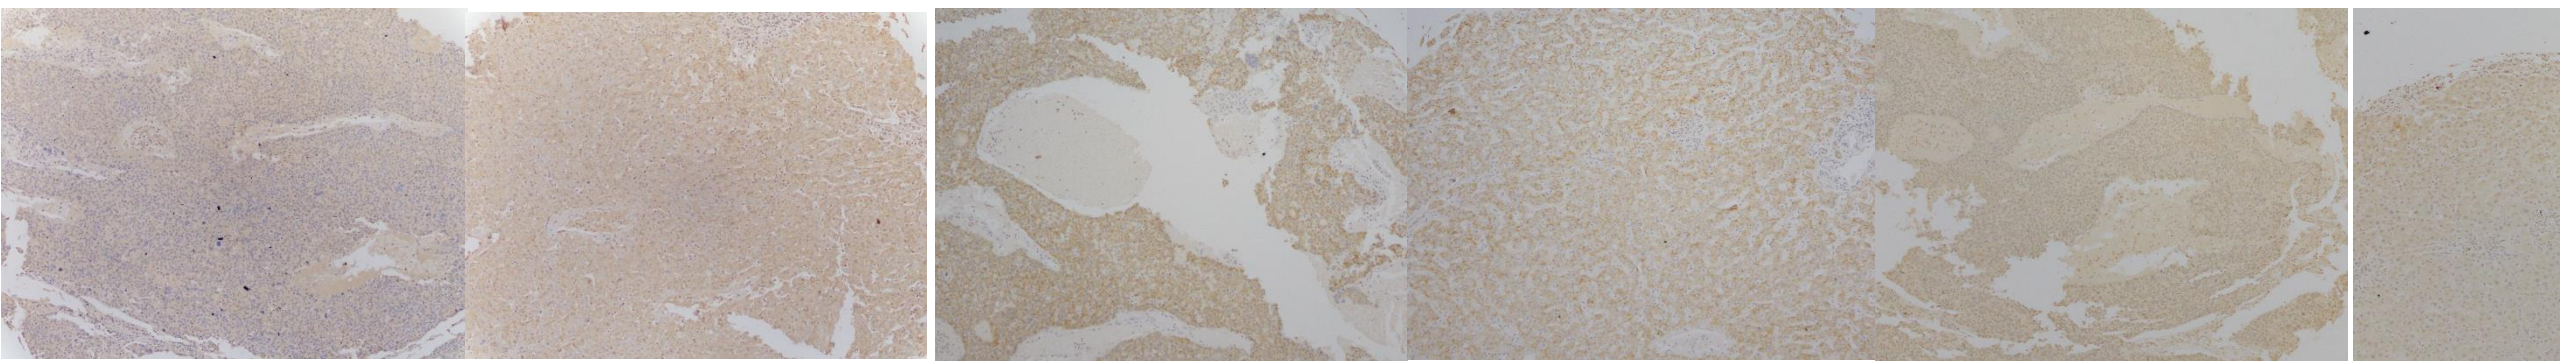

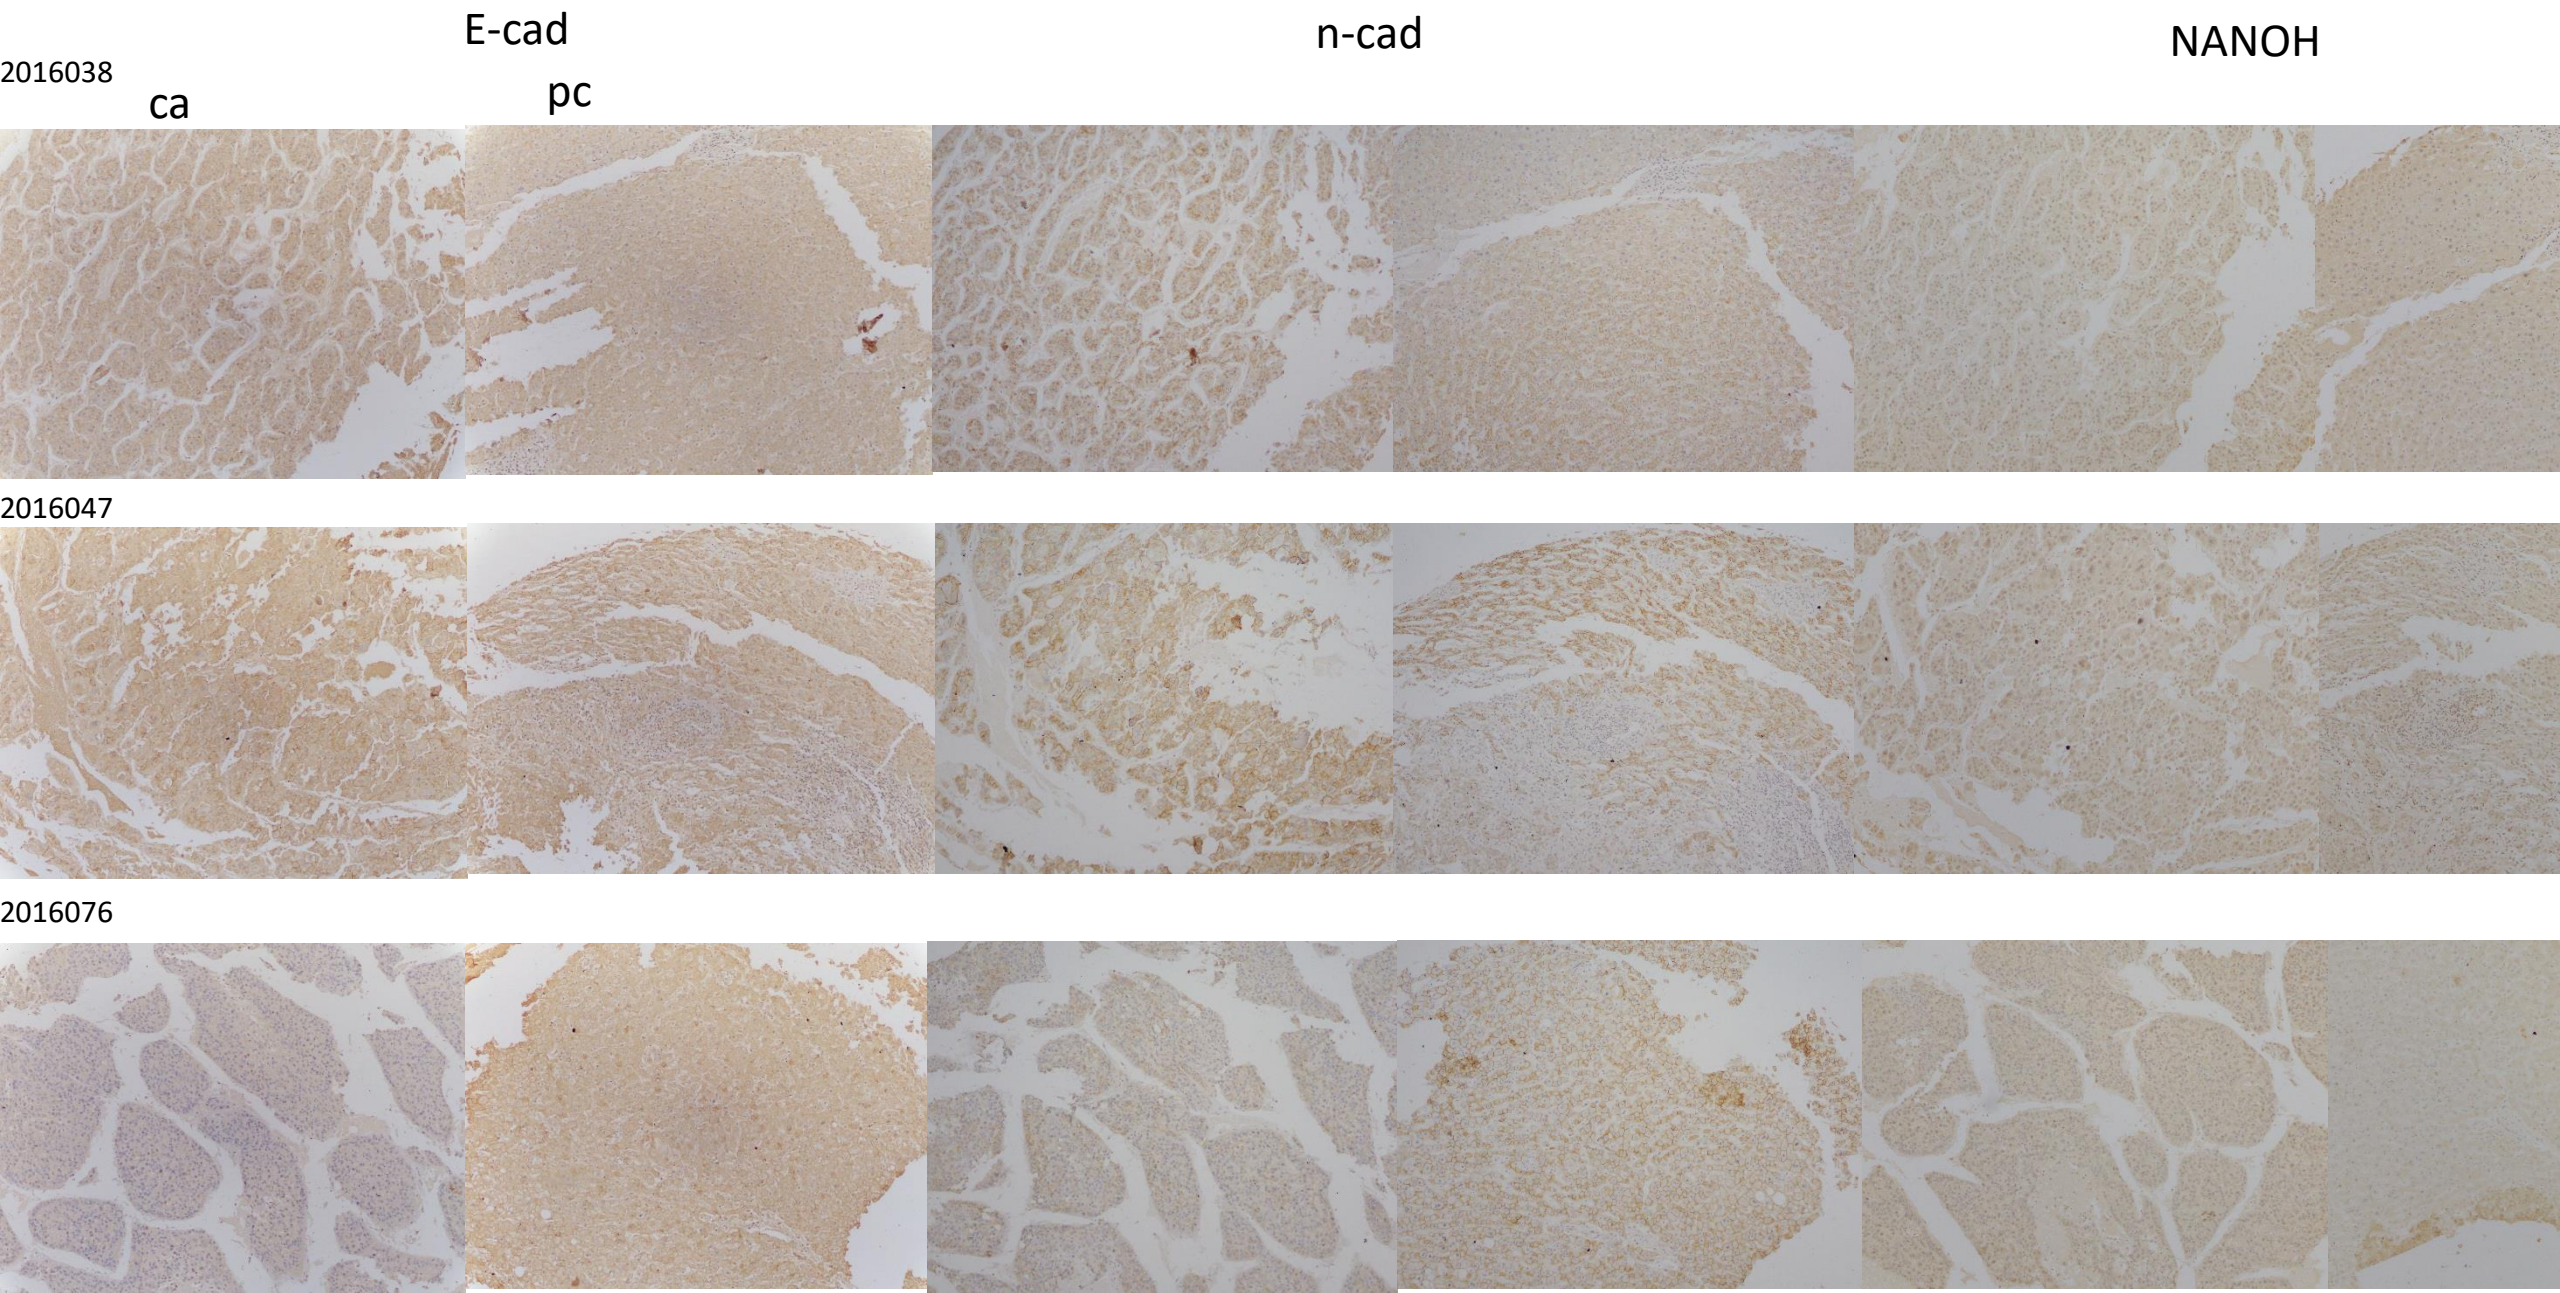

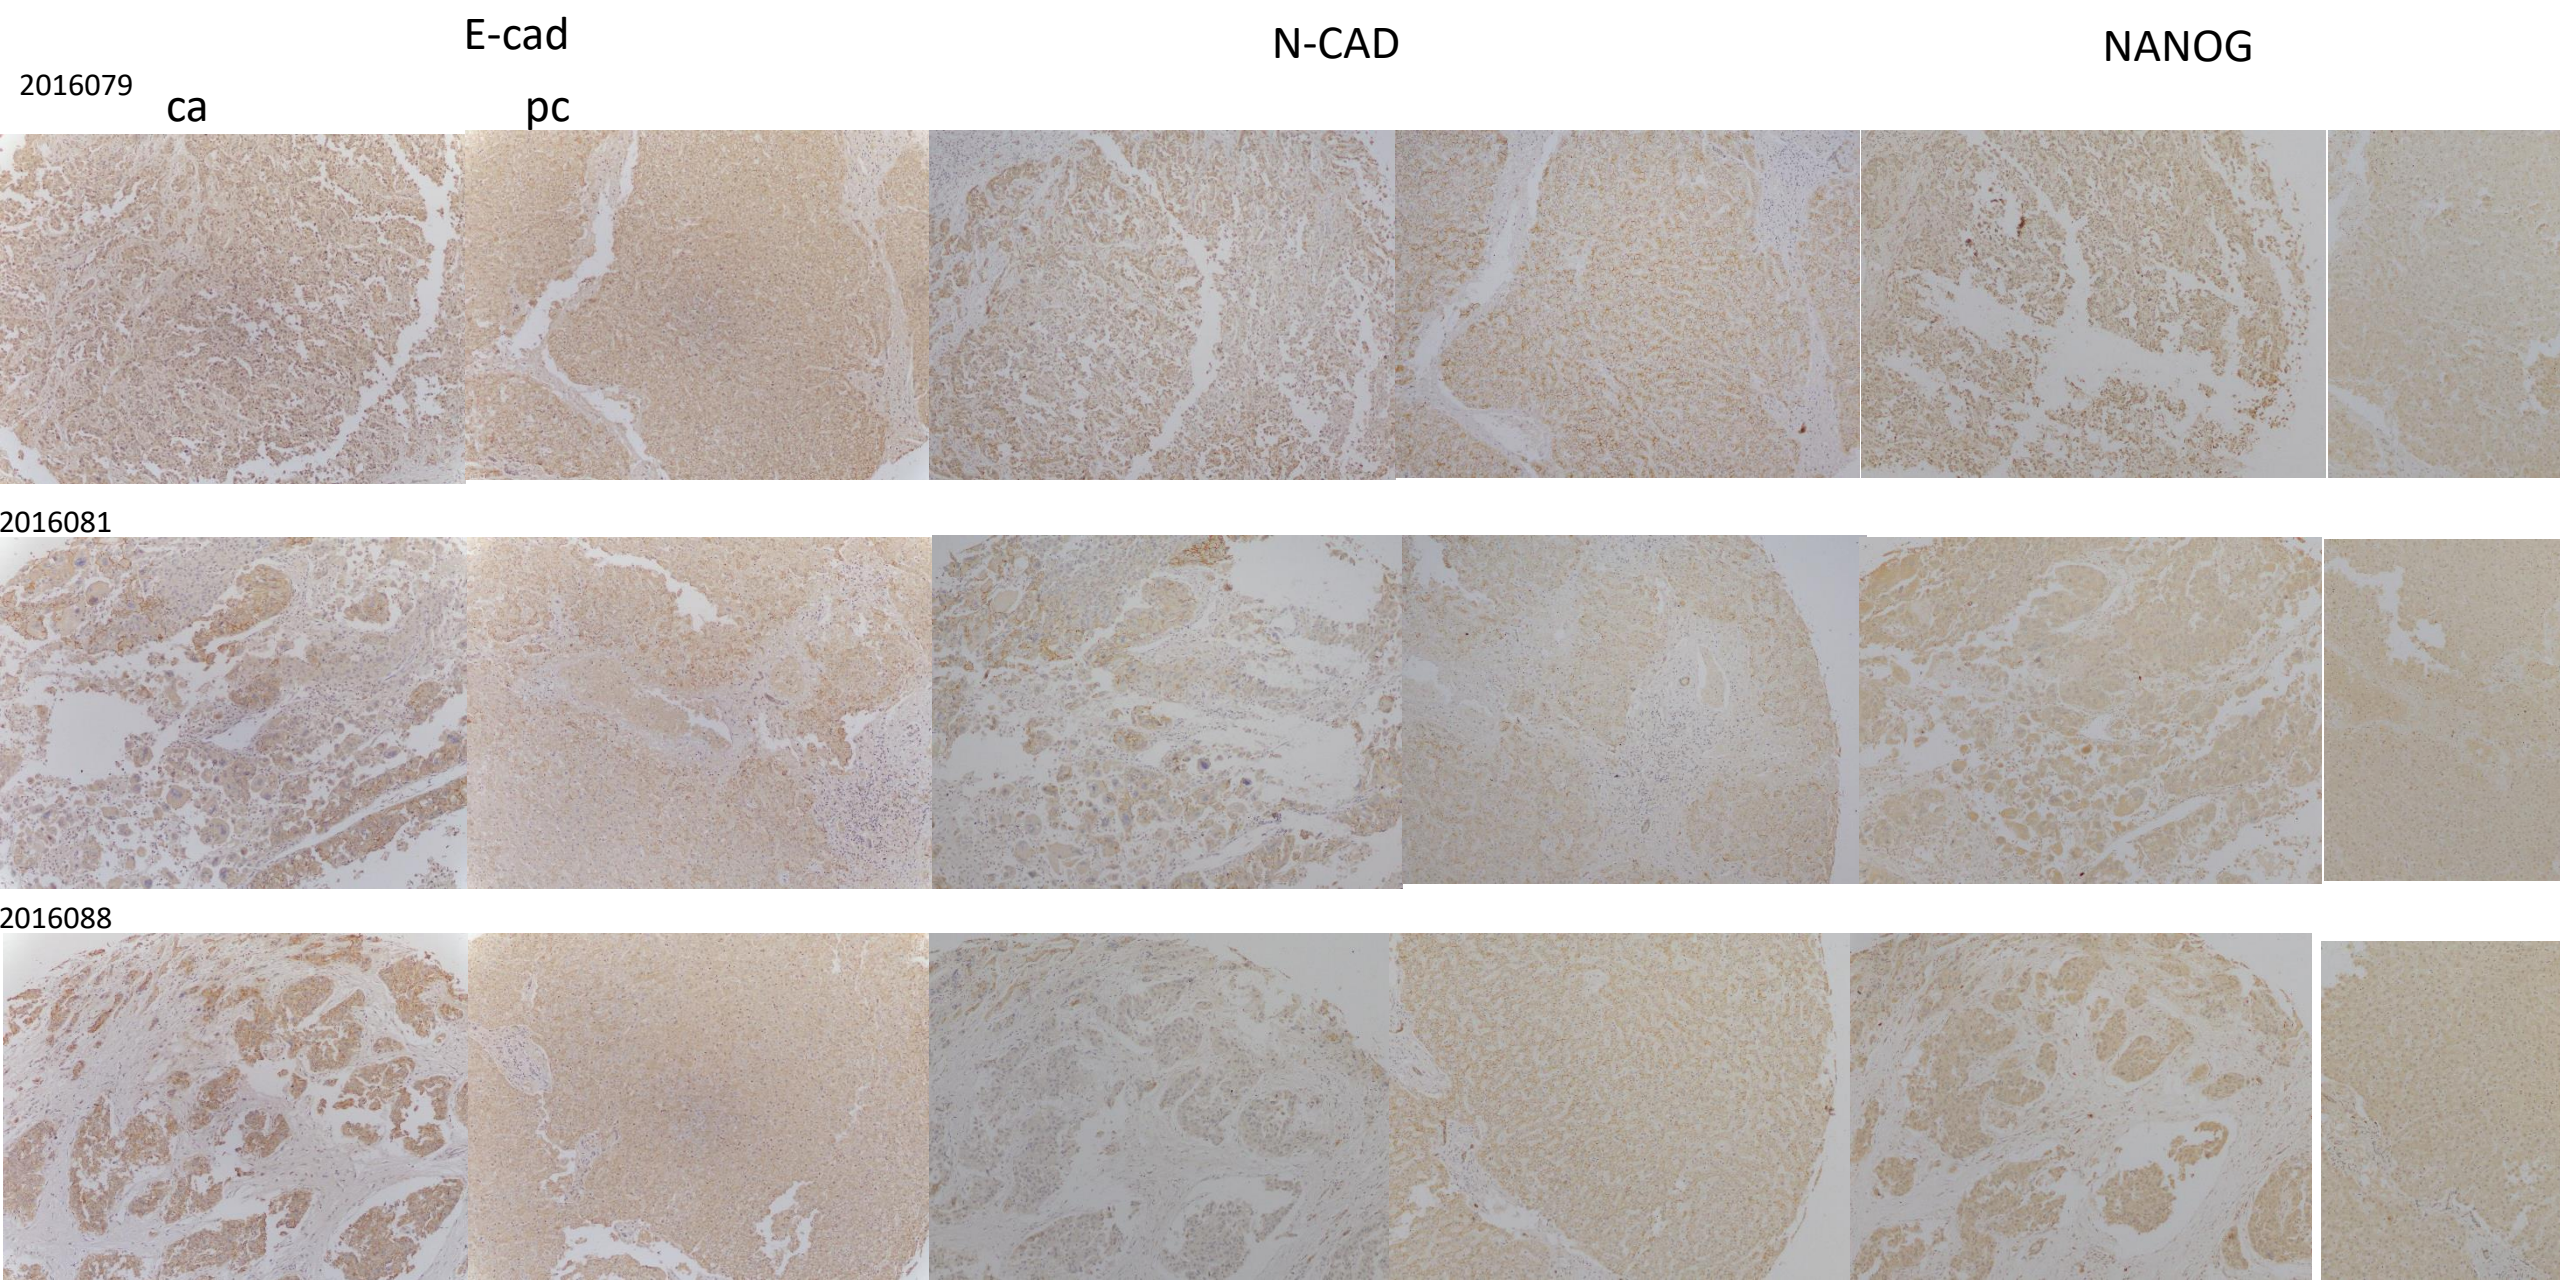



E-cadpc

ca

2016097

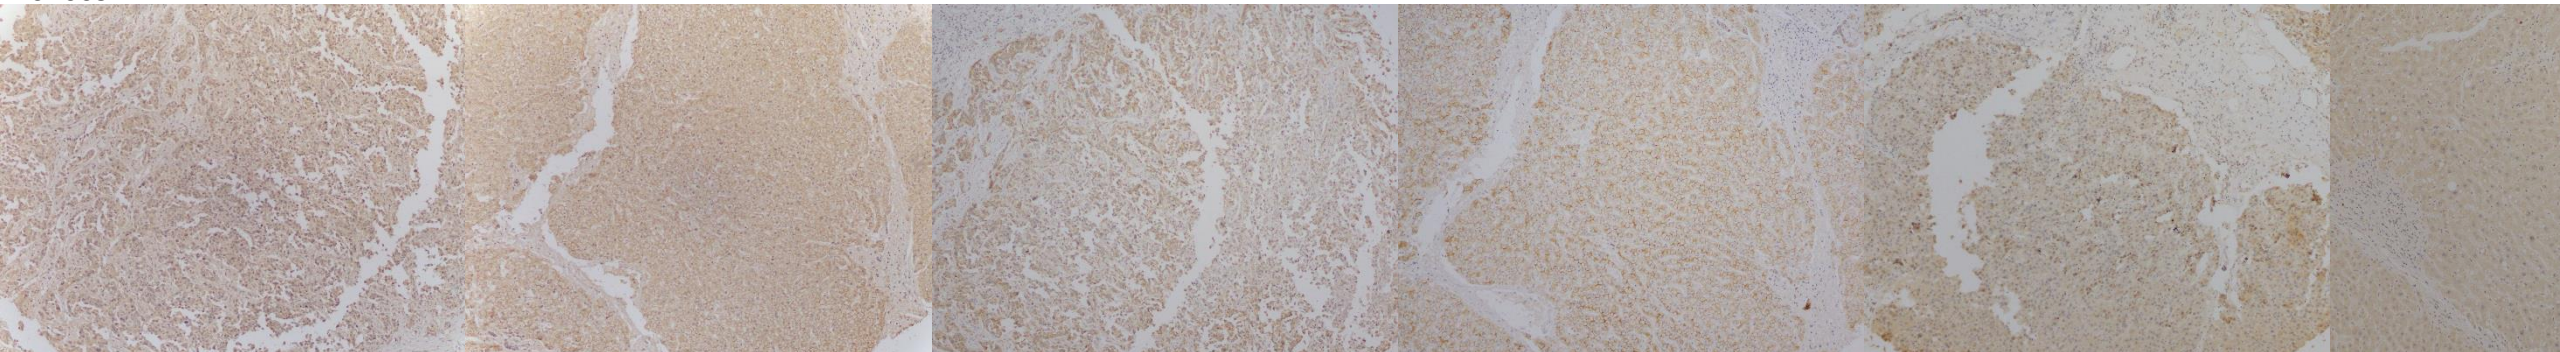

2016126

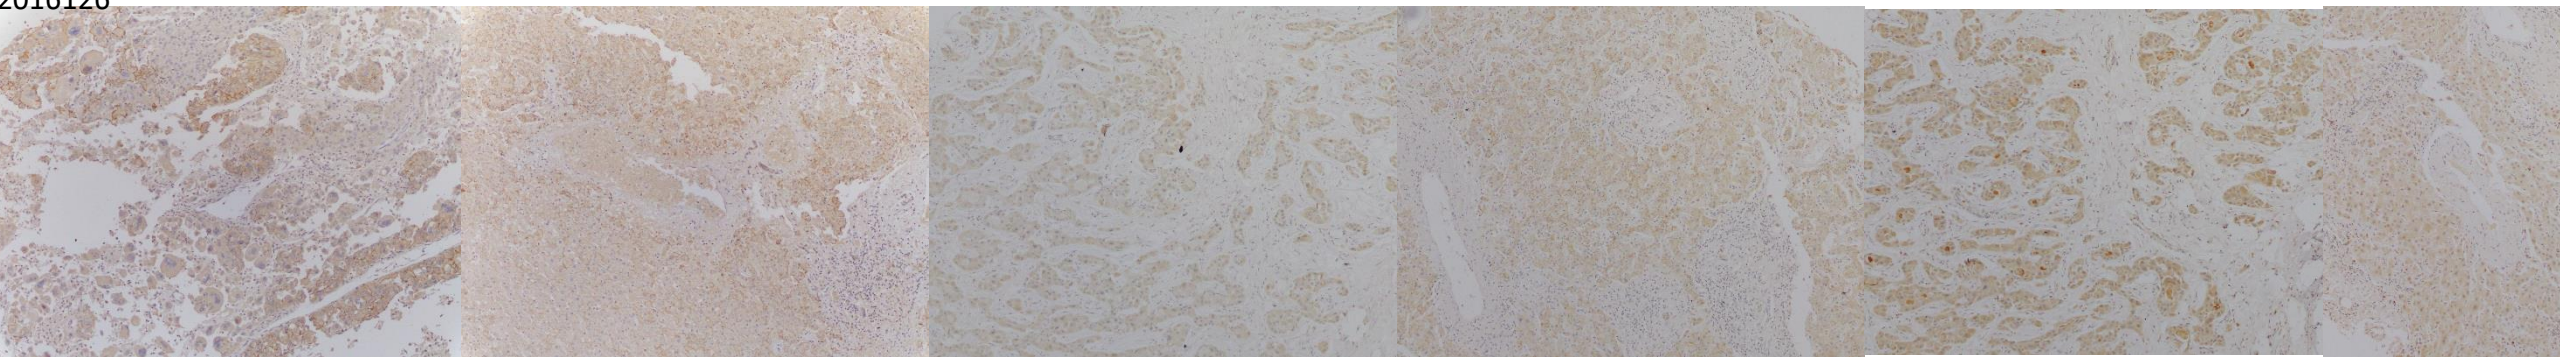

2016160

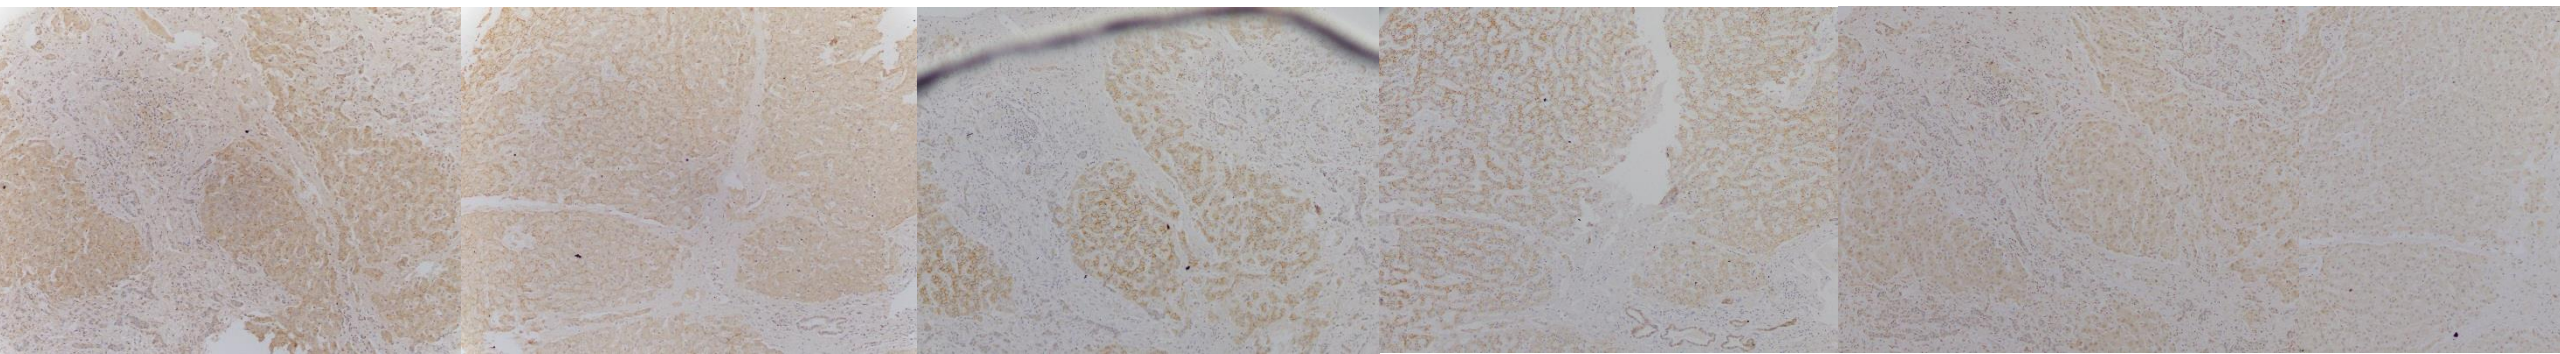

E-cad

2016131 ca

pc

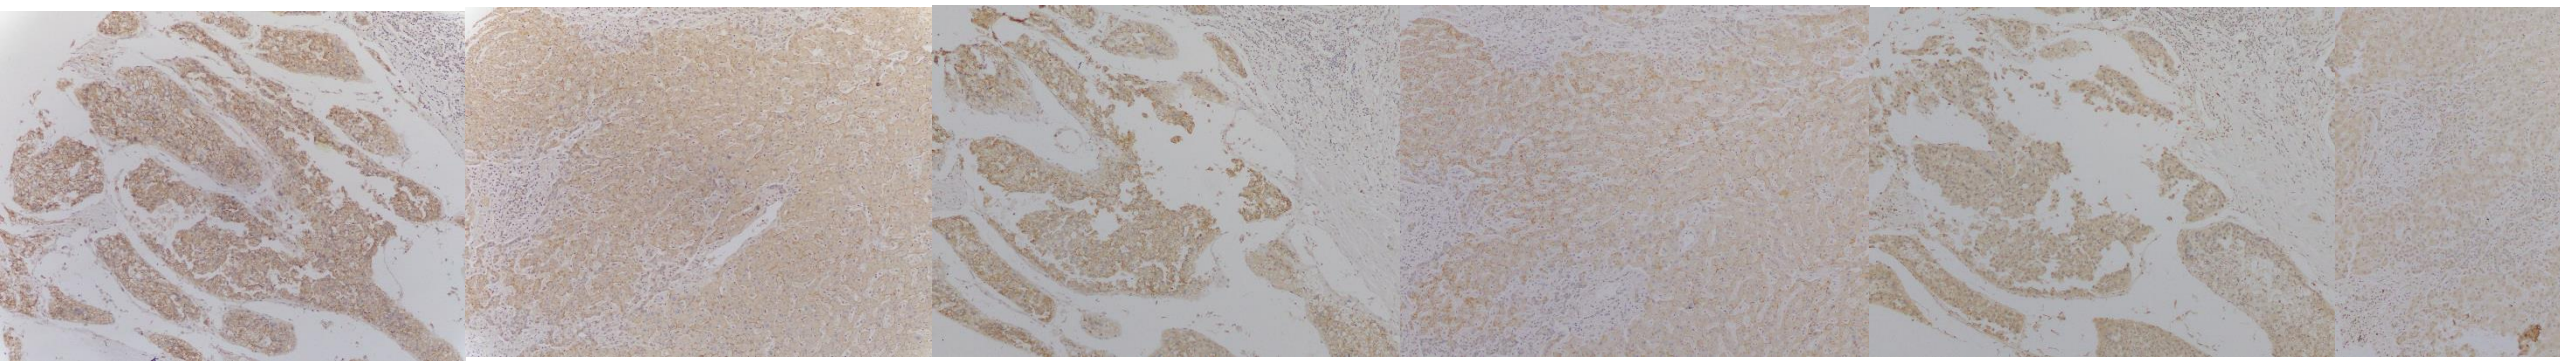

2016132

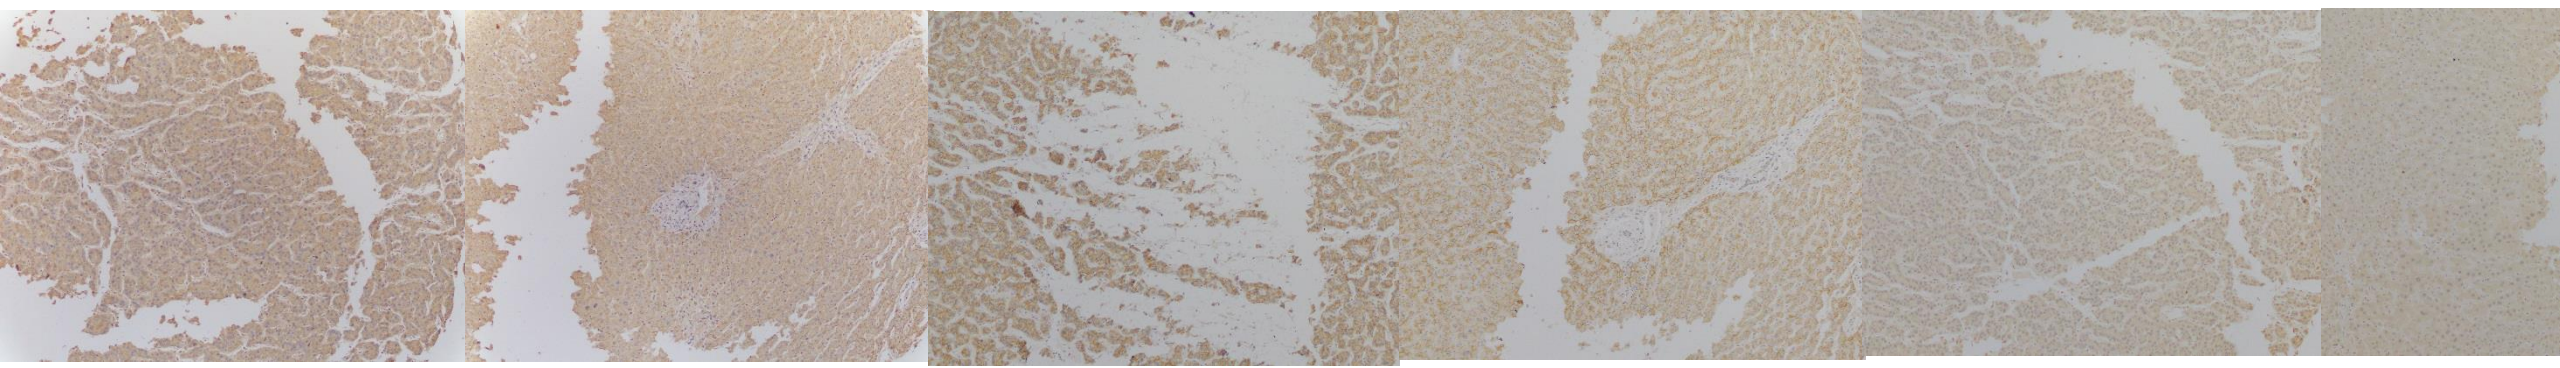

2016140

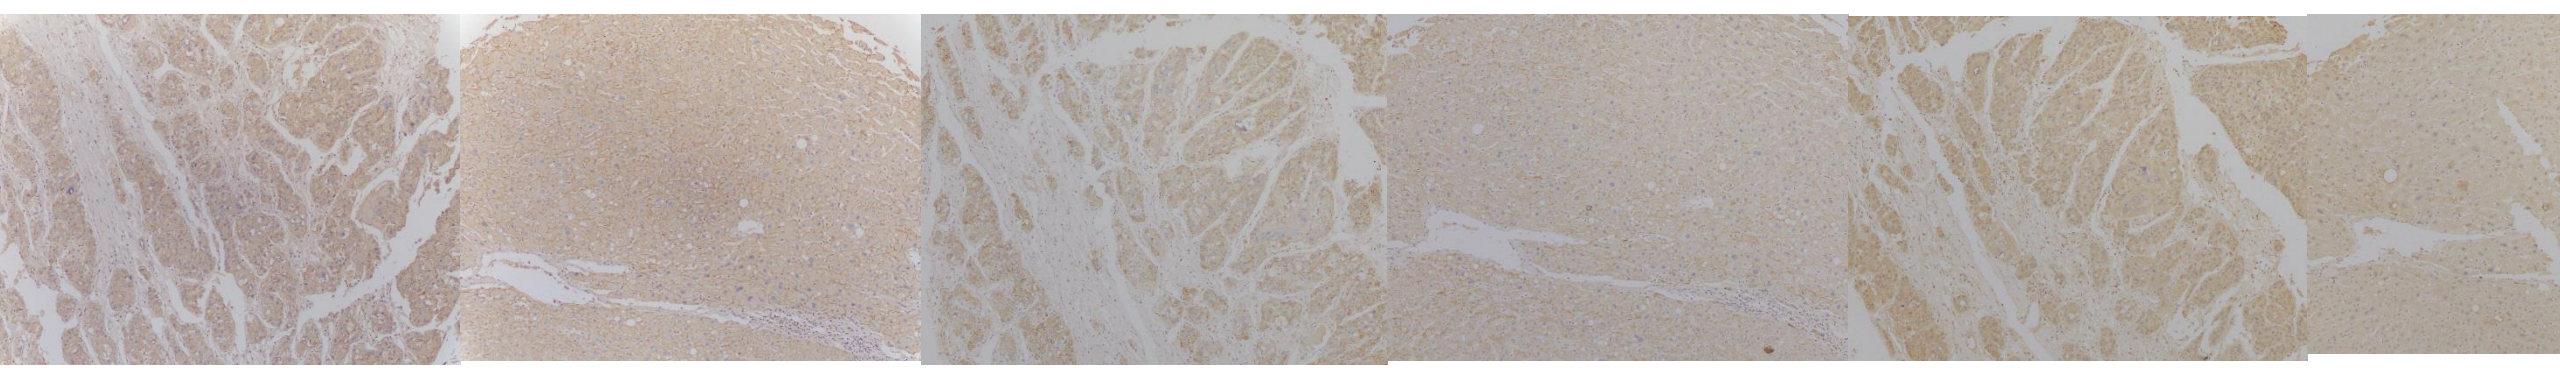

E-cad

2016161

ca

pc

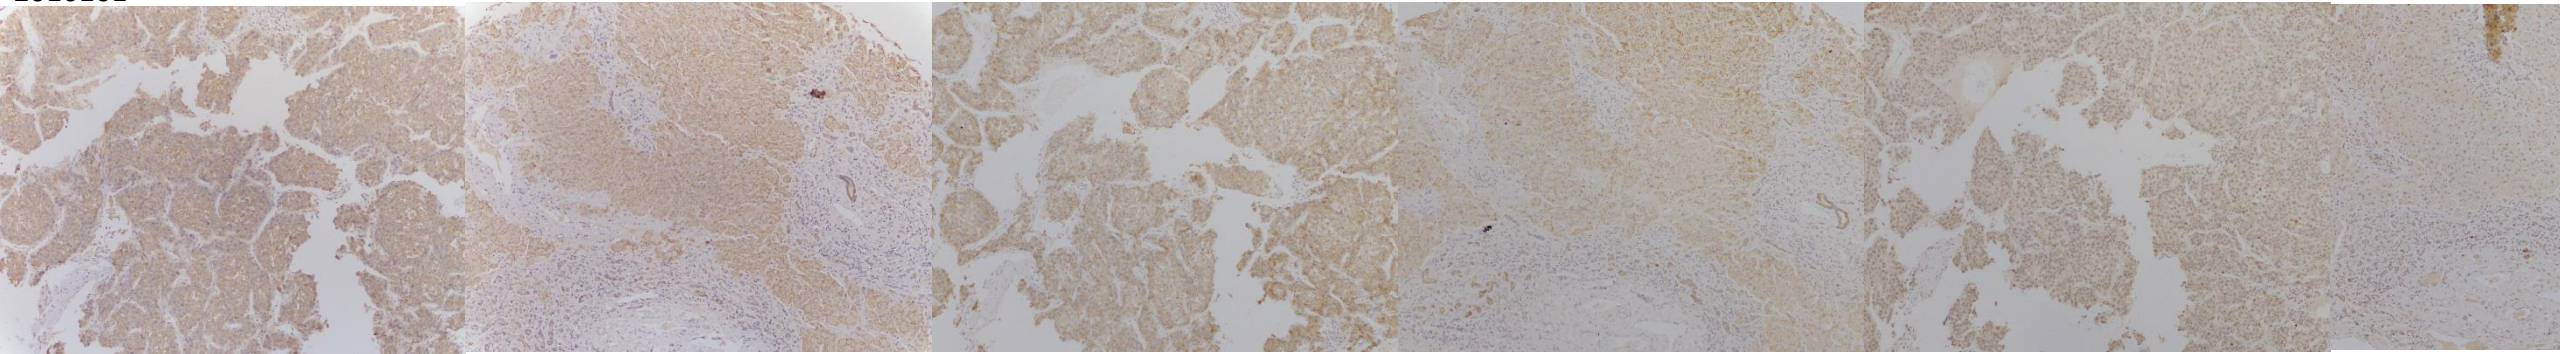

2016165

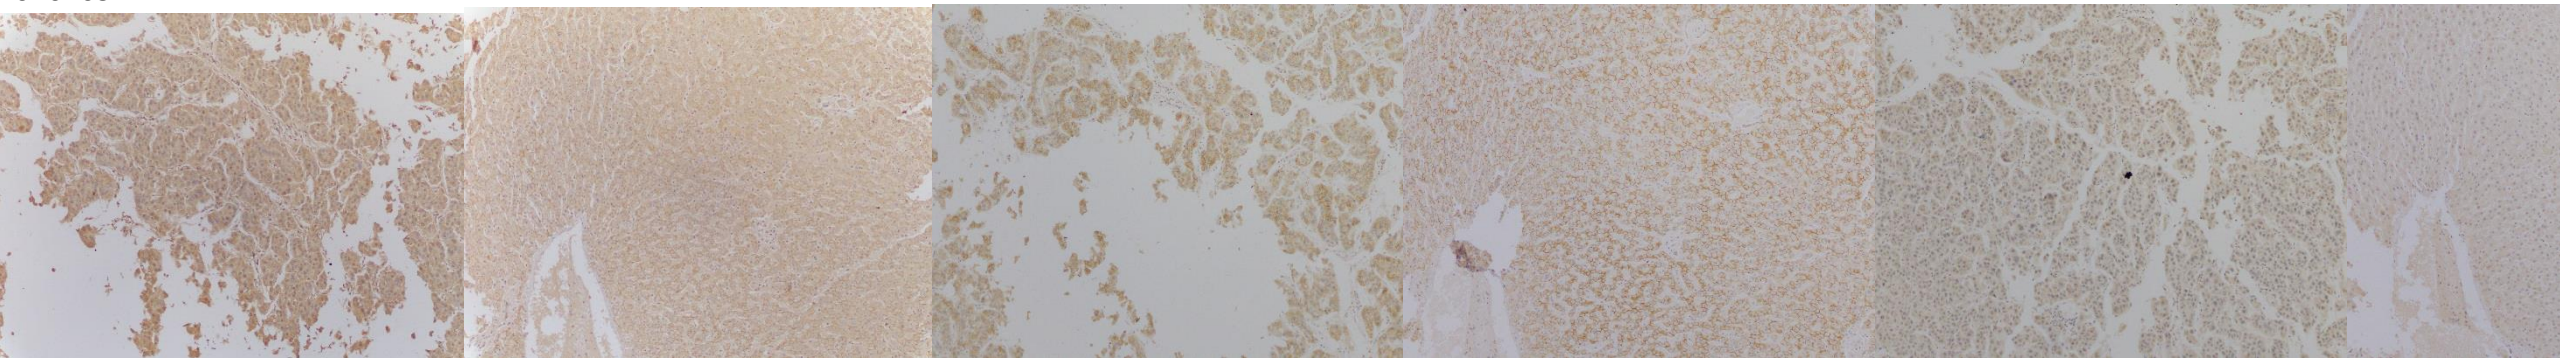

2016201

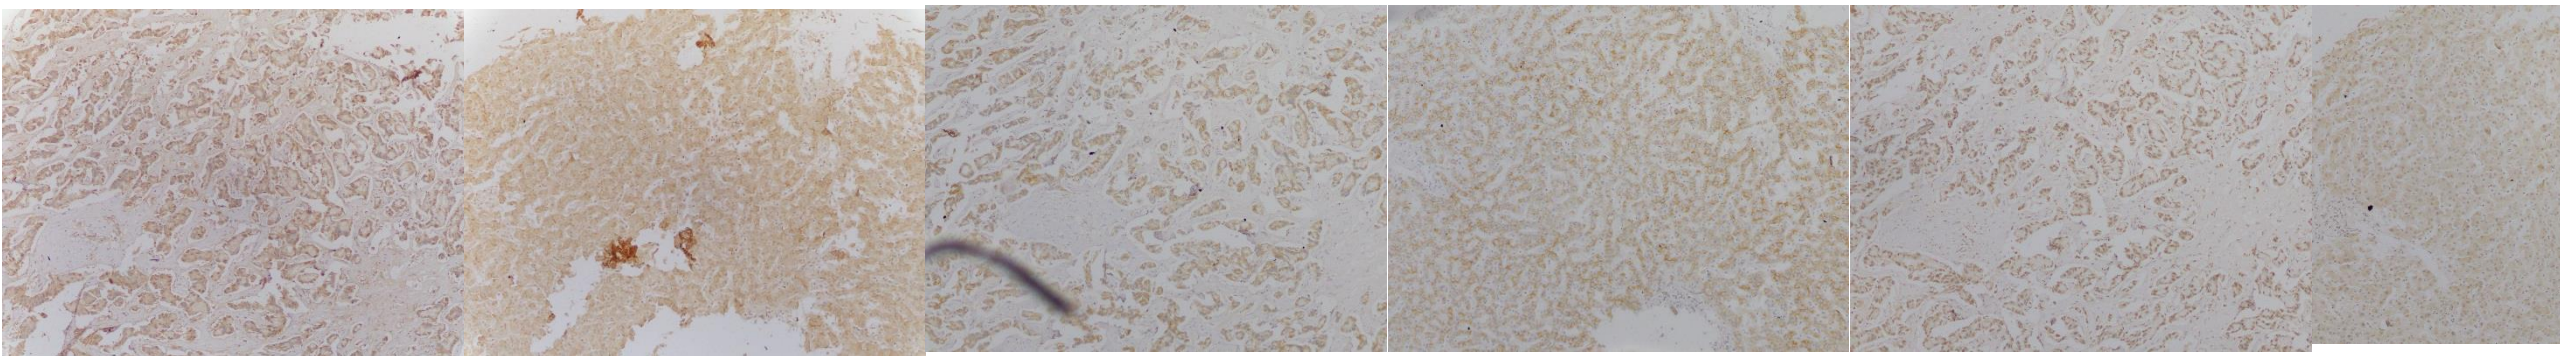

E-cad

ca

pc

2016221

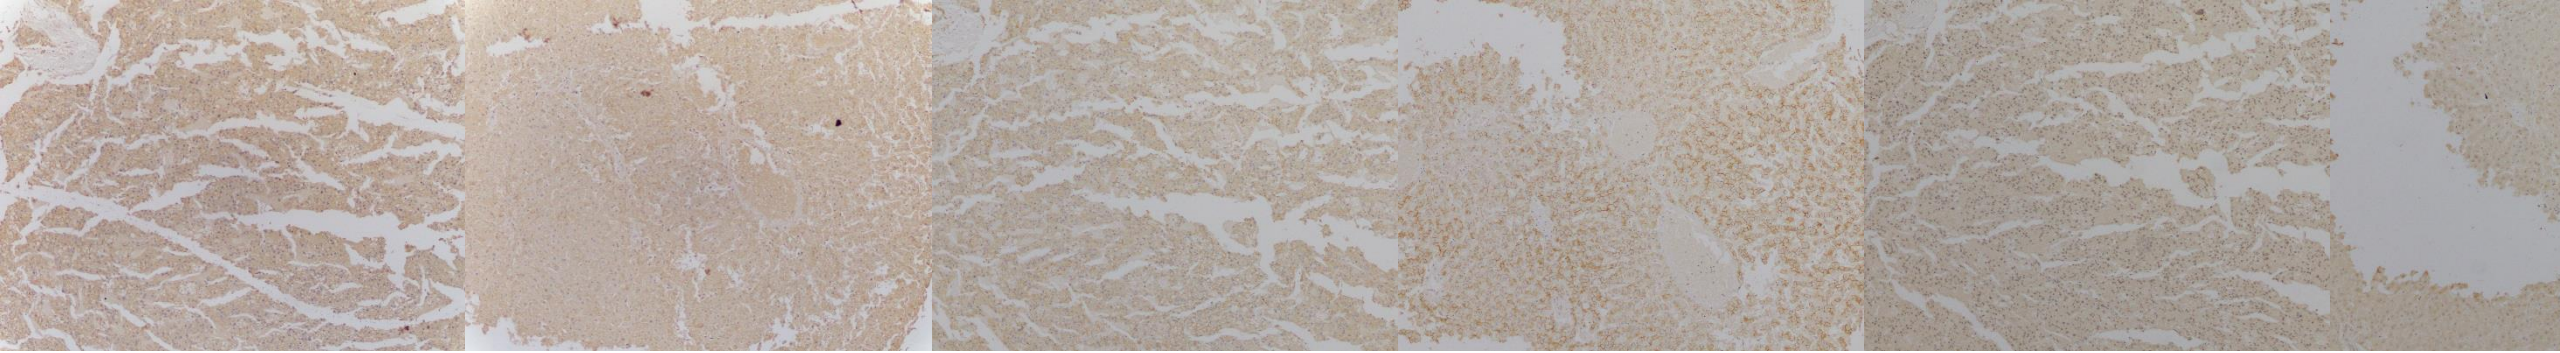

2016228

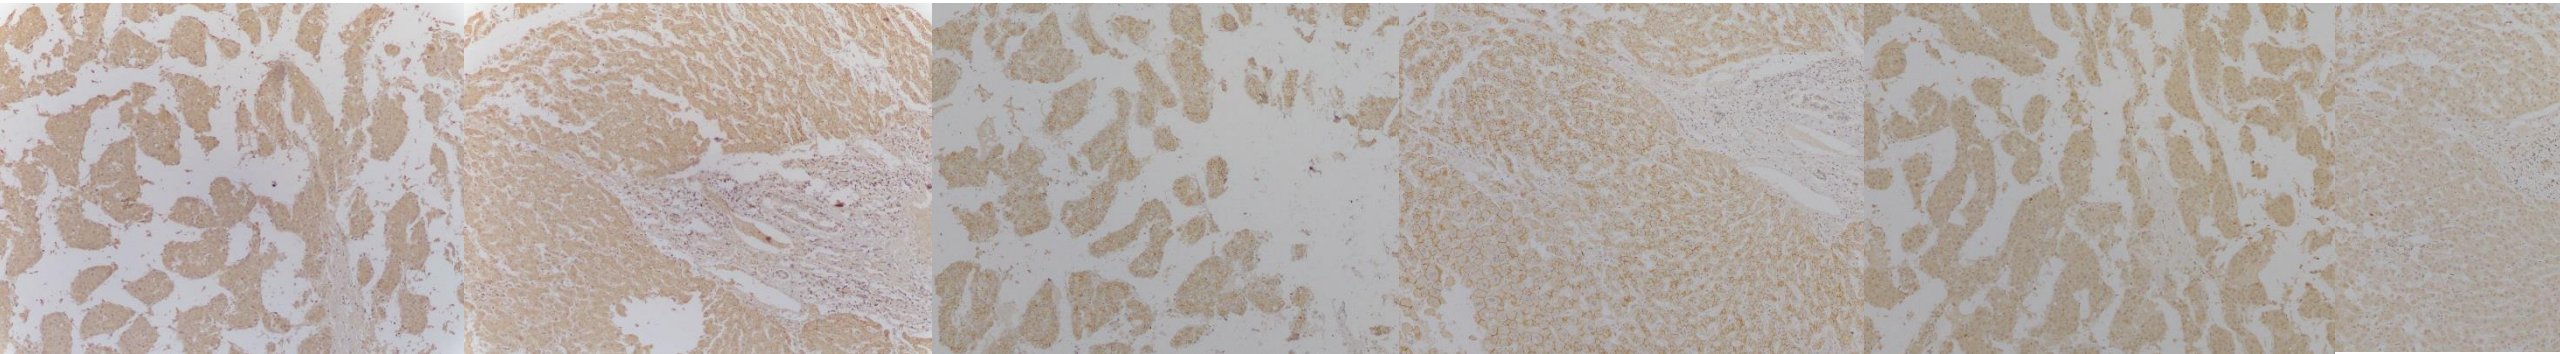

2016229

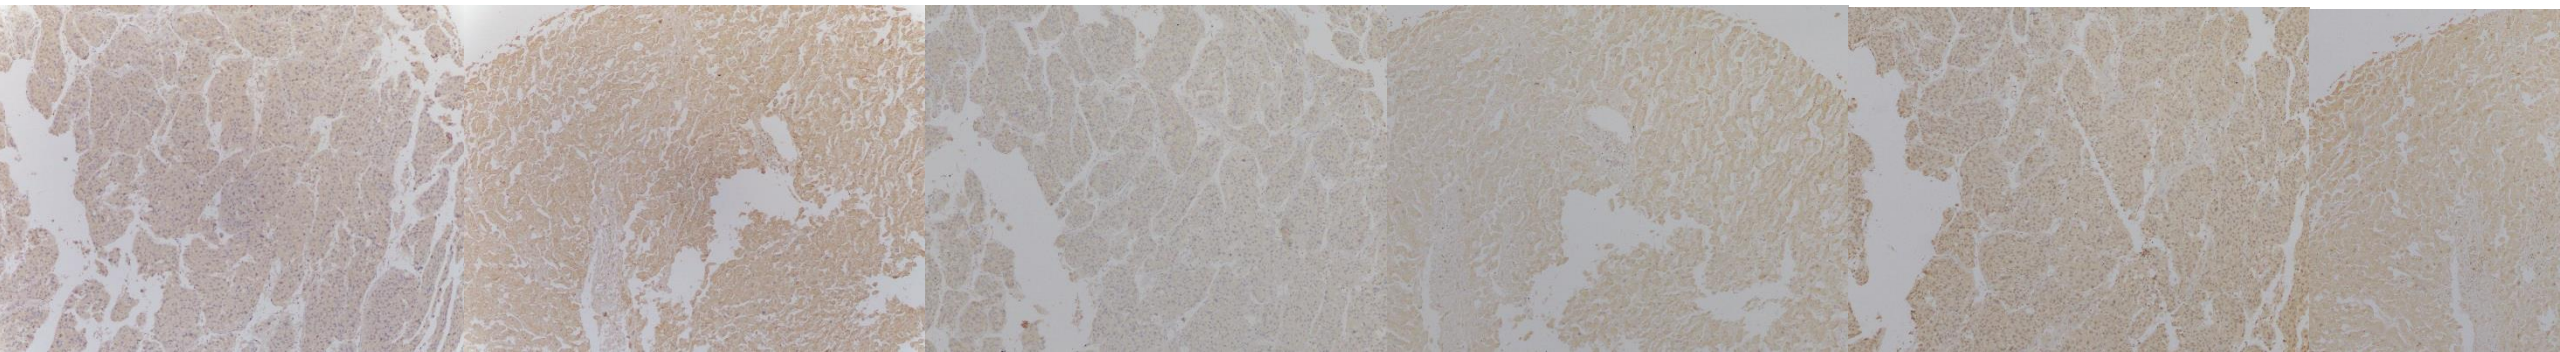

E-cad

2016237 ca

pc

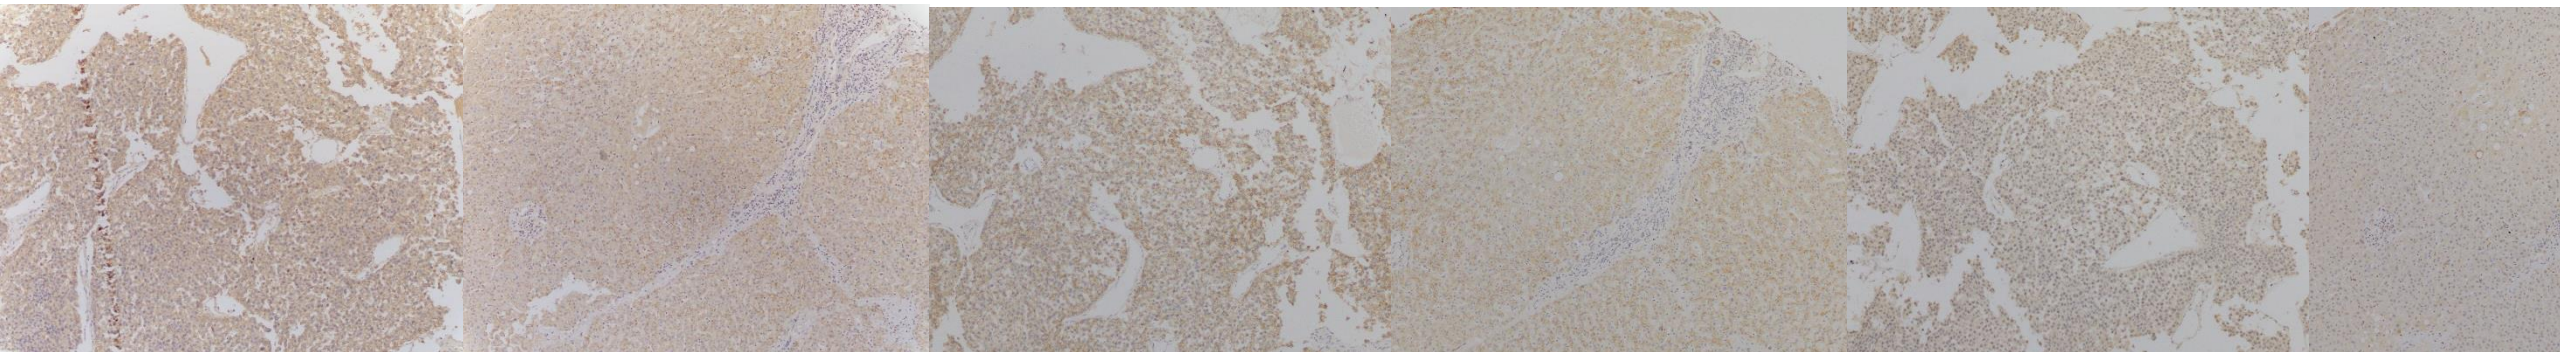

2016243

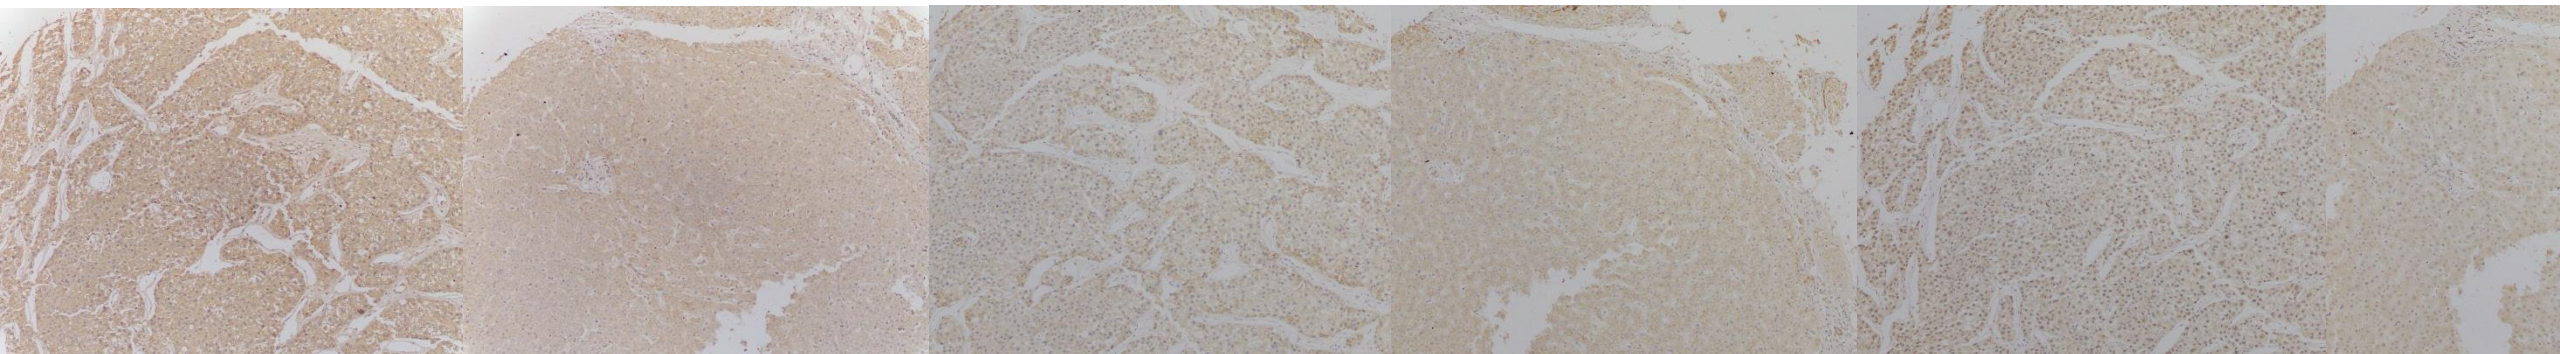

2016278

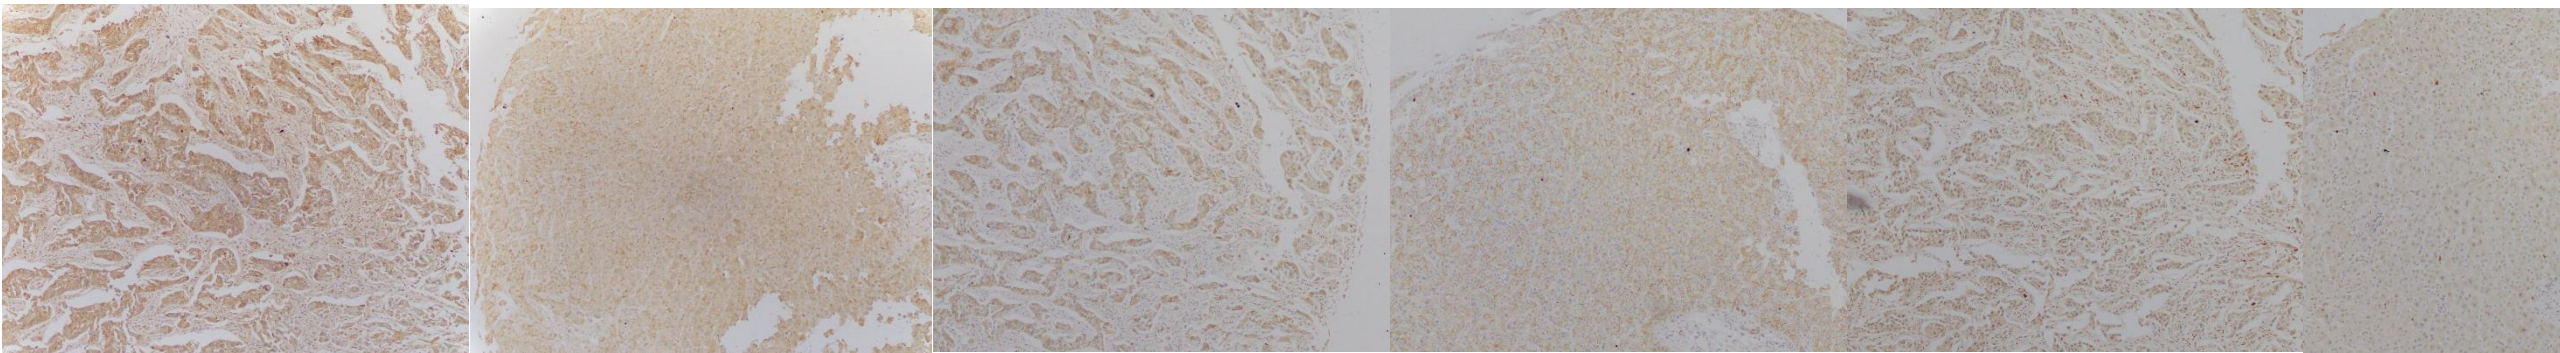

E-cad

ca

pc

2016289

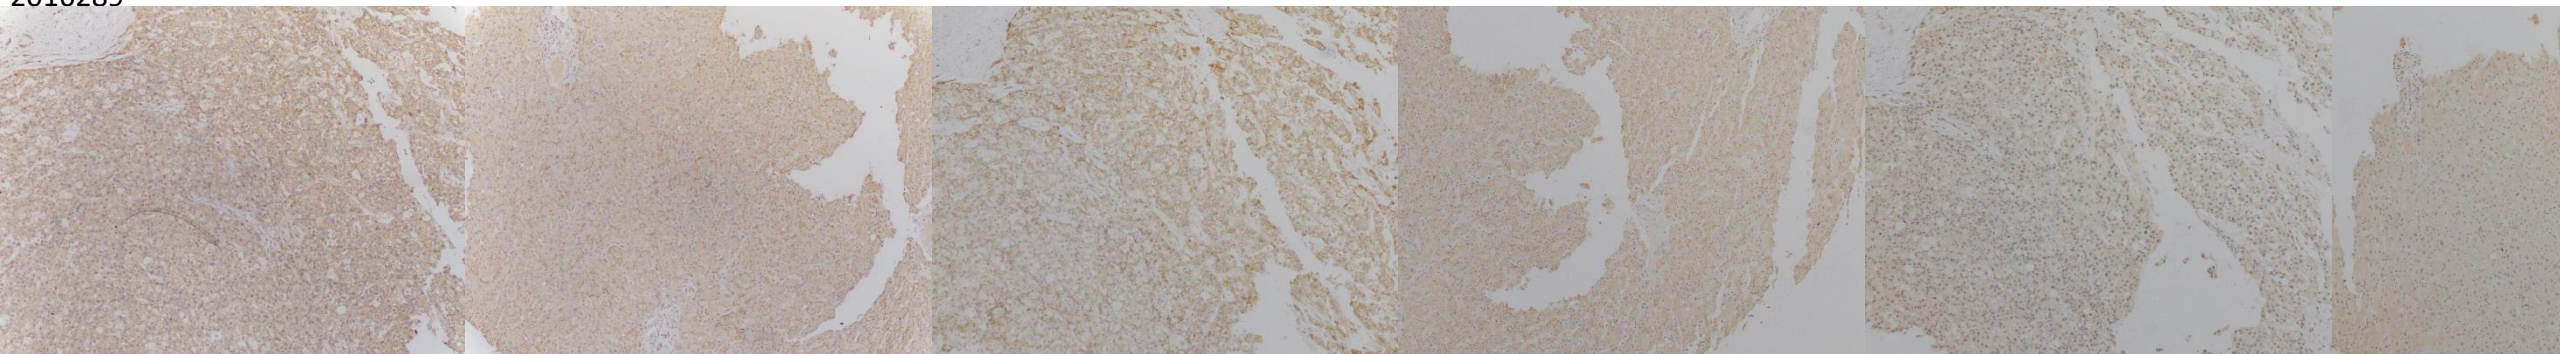

2016292

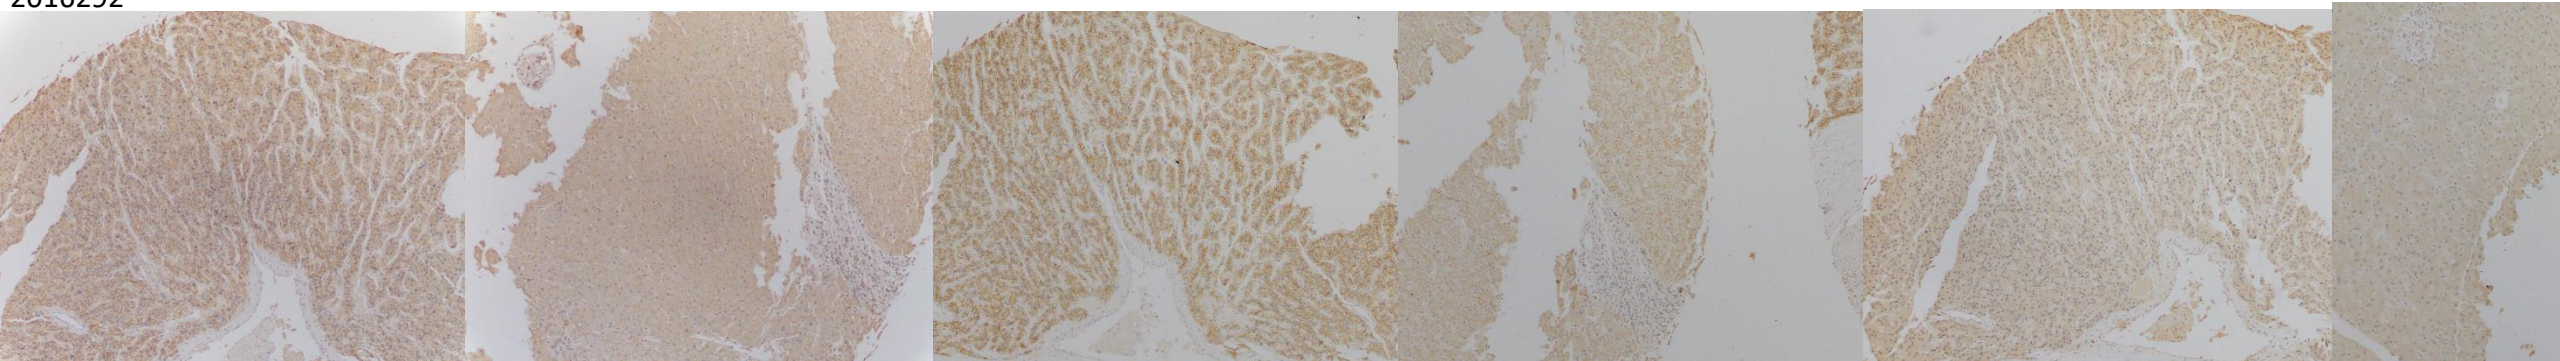

2016293

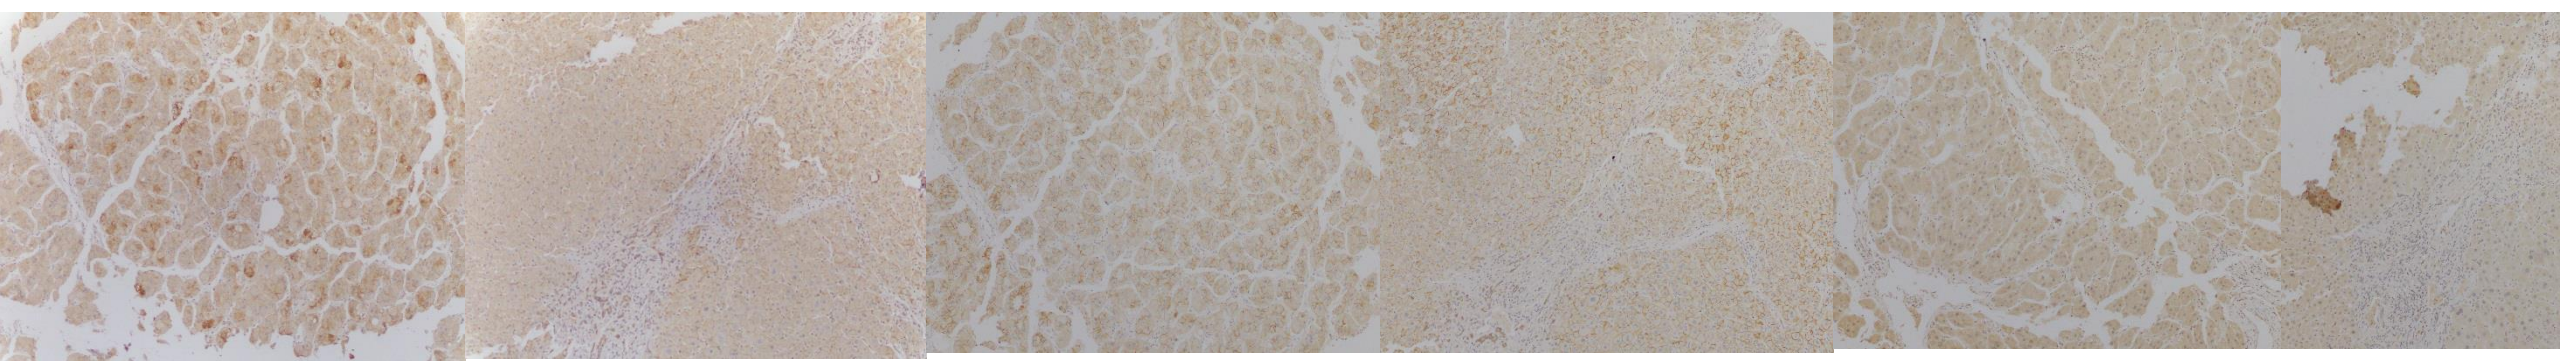

E-cad

ca

pc

2016297

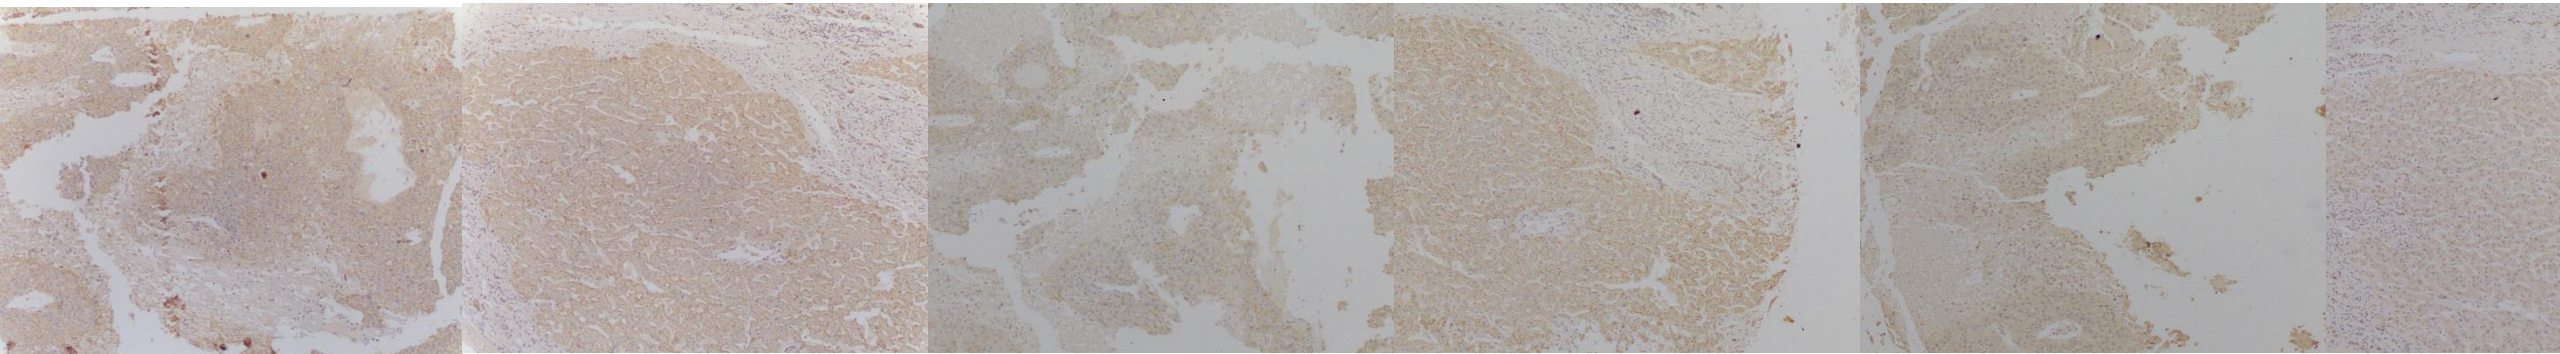

2016300

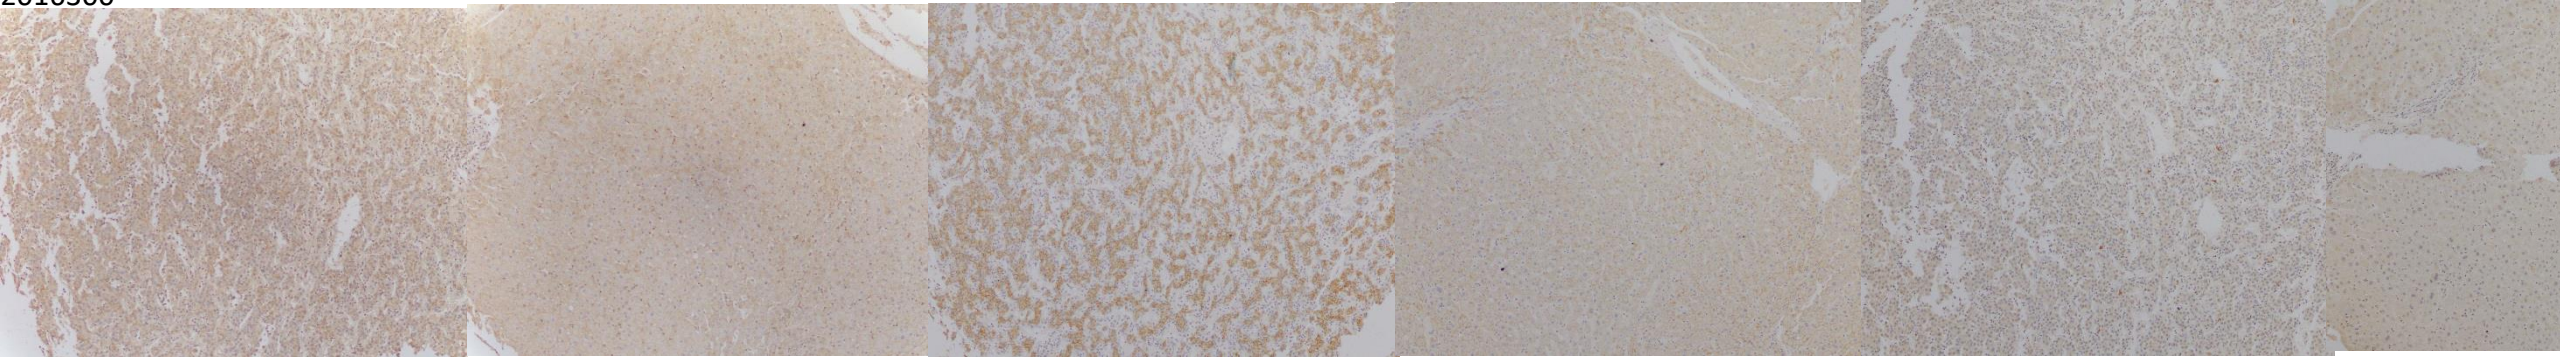

2016301

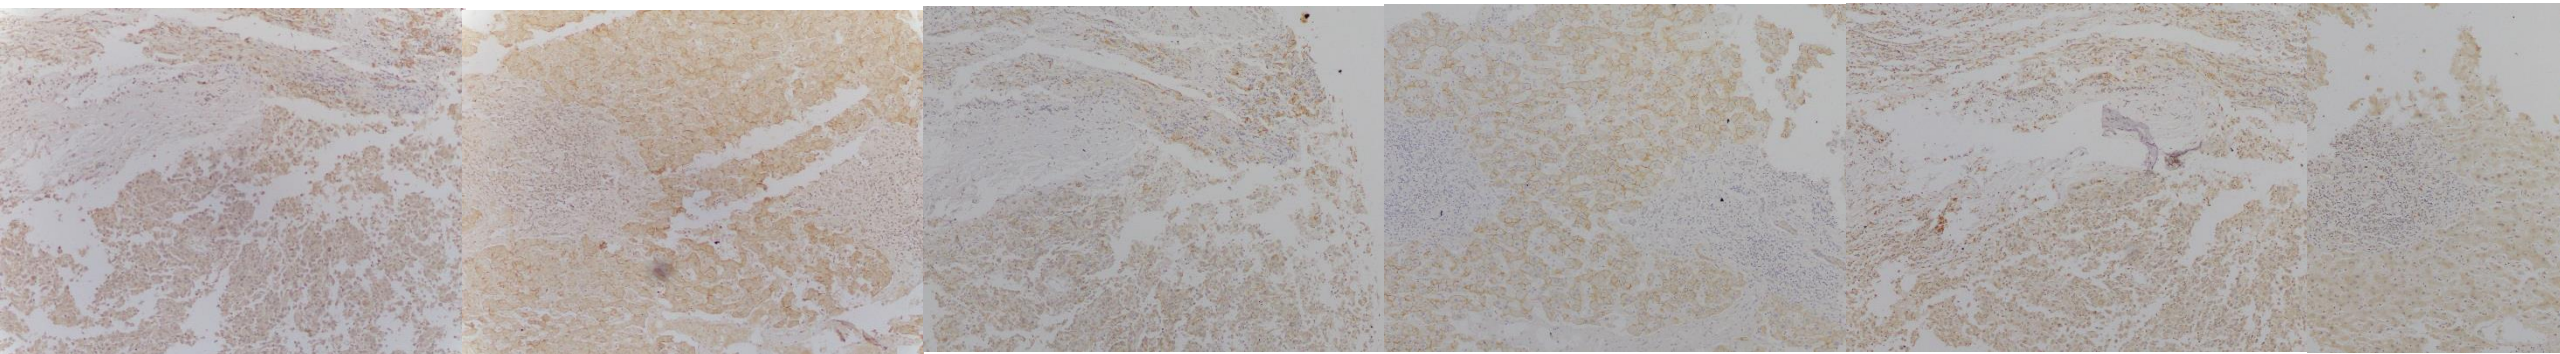

E-cad

ca

pc

2016307

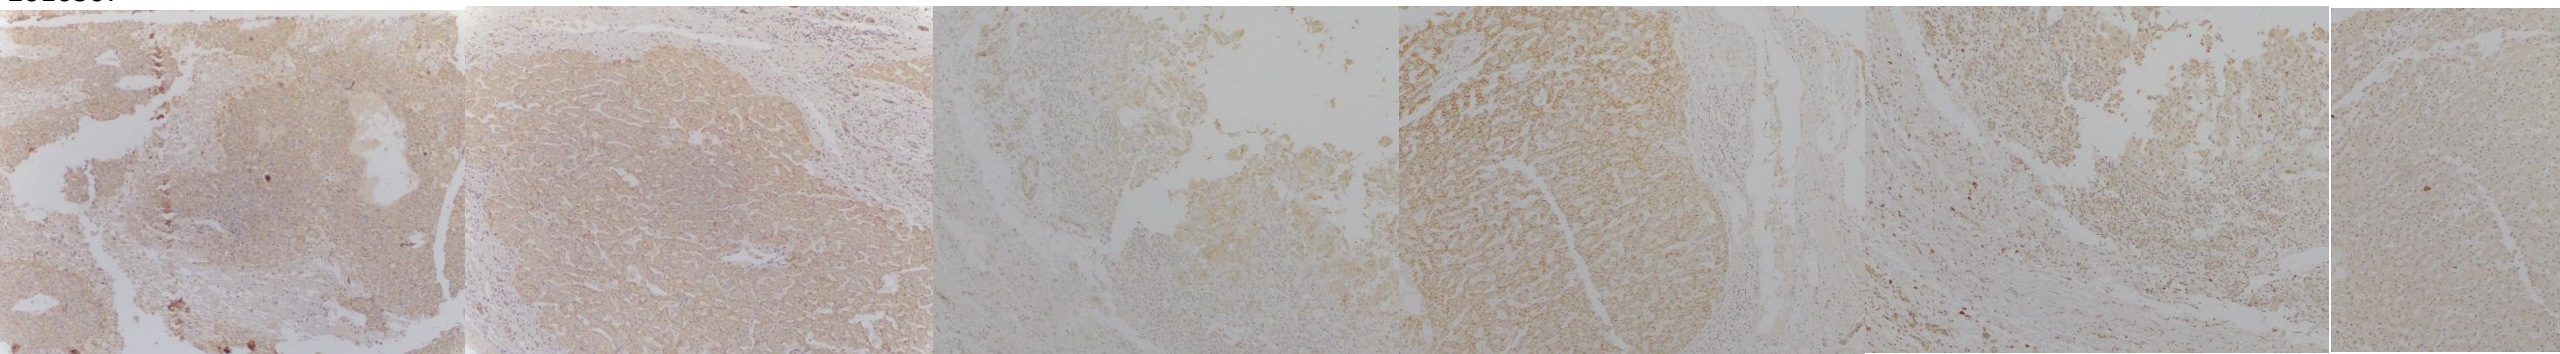

2016310

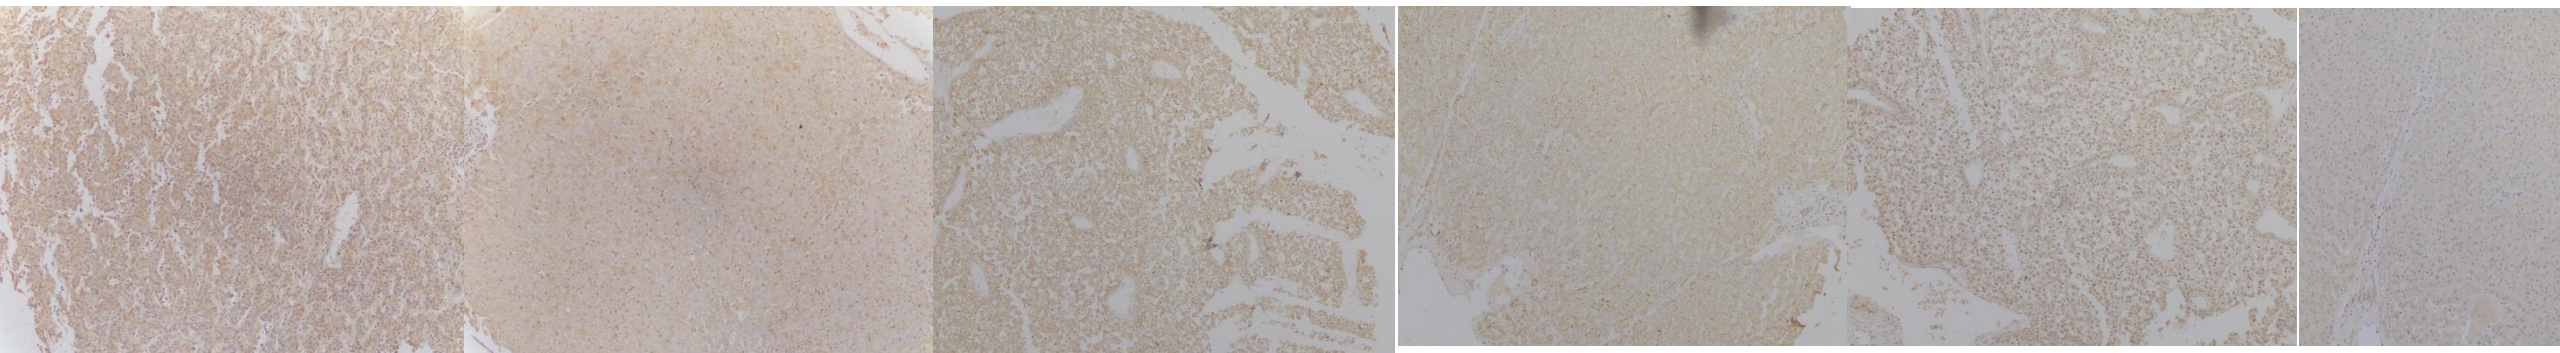

2016312

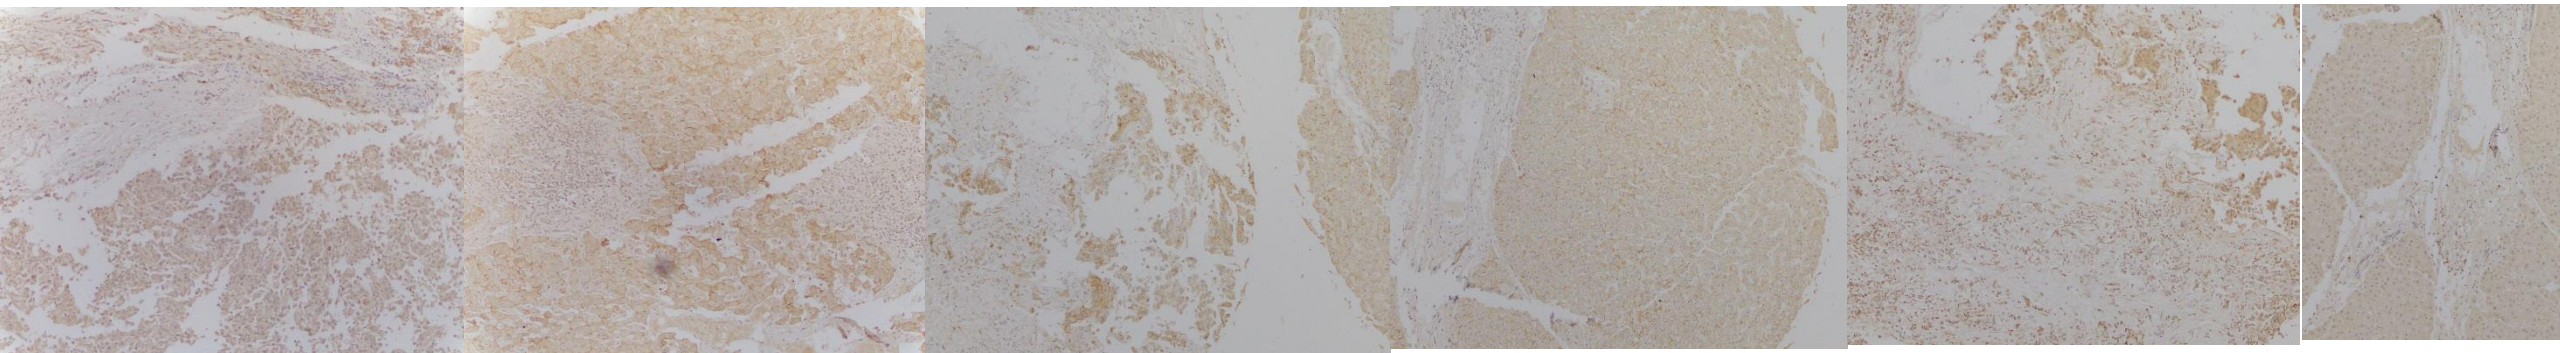



E-cad

n-cad

NANOG

2016313

ca

pc

ca

pc

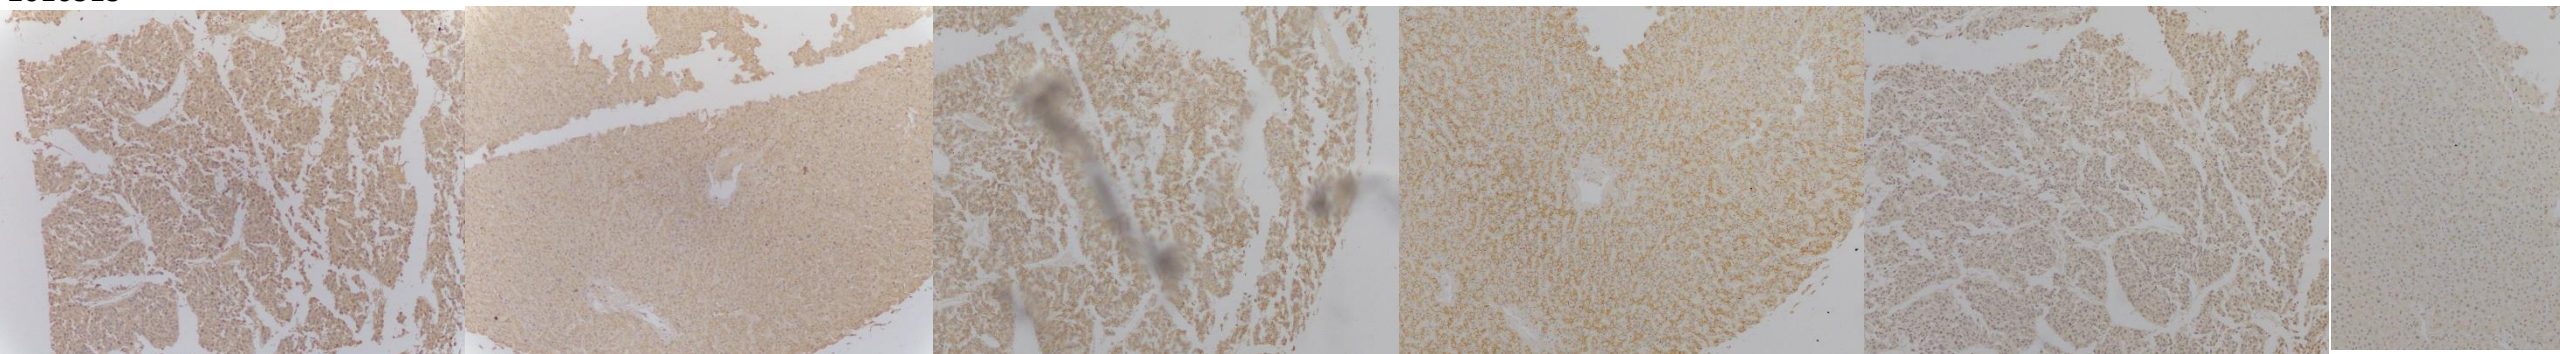

2013002

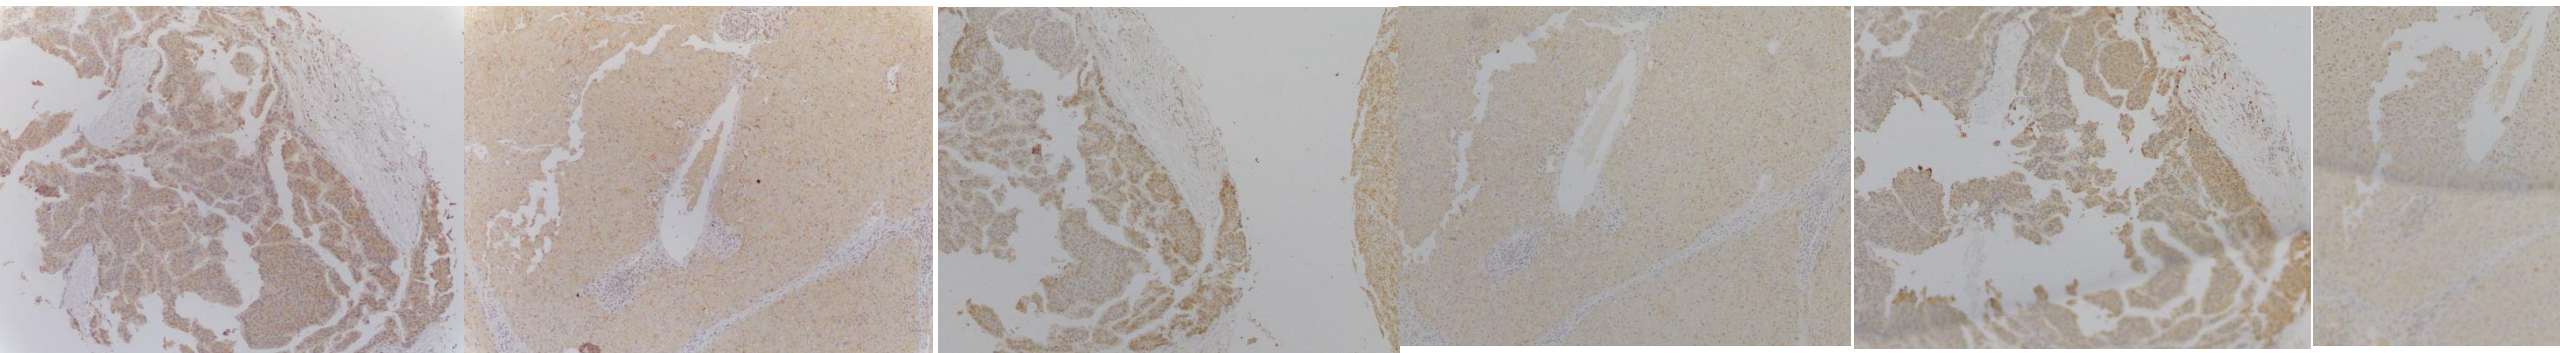

2013003

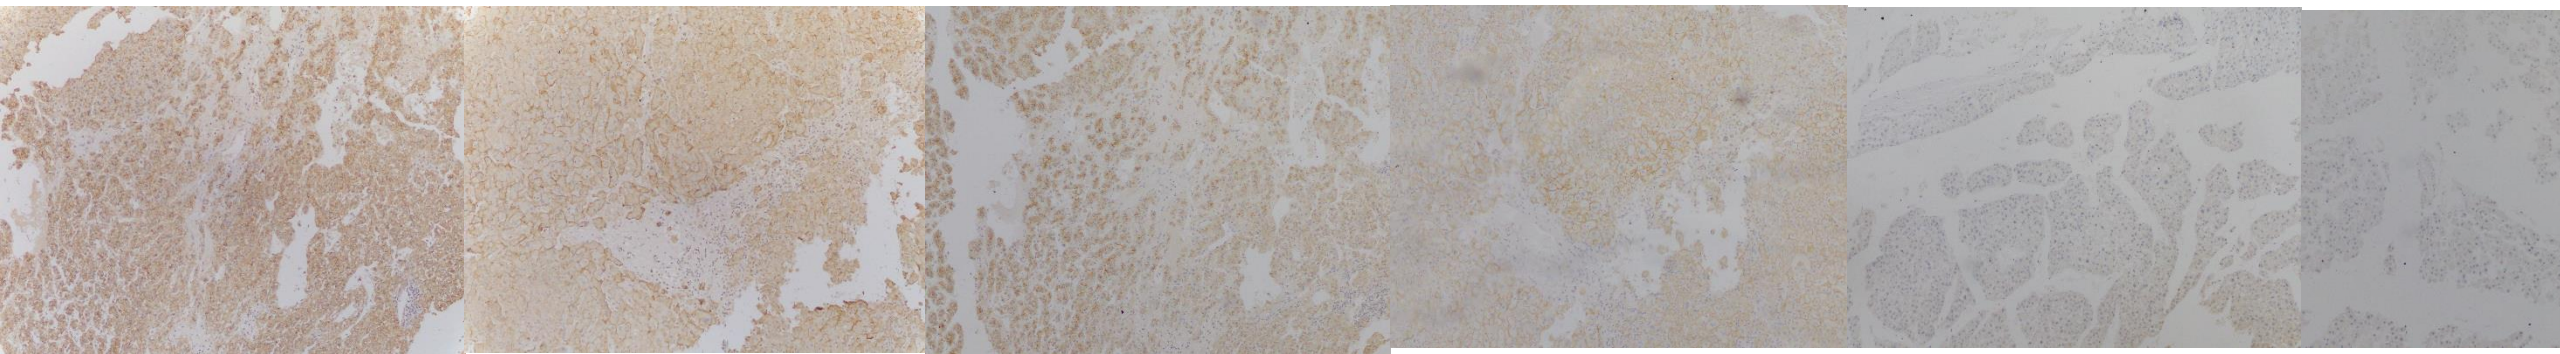

E-cad

n-cad

NANOG

2015285 Ca

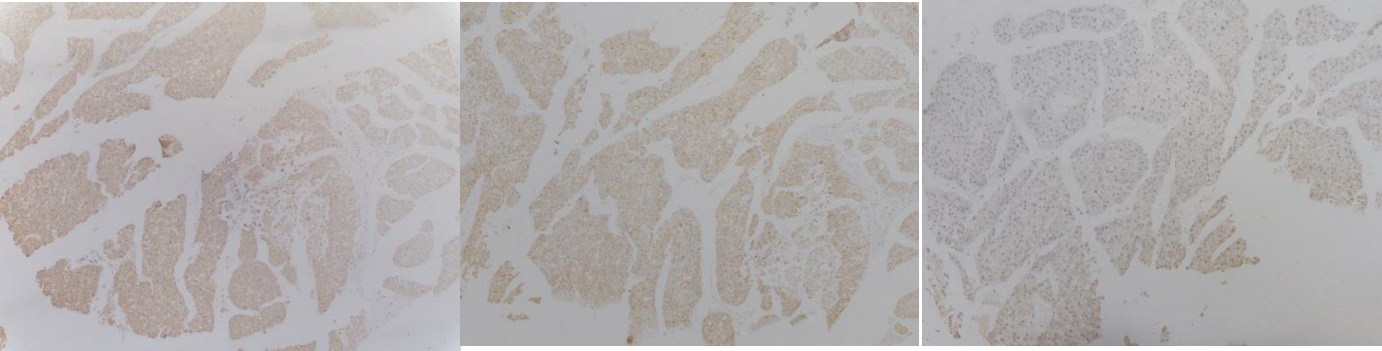

2015296

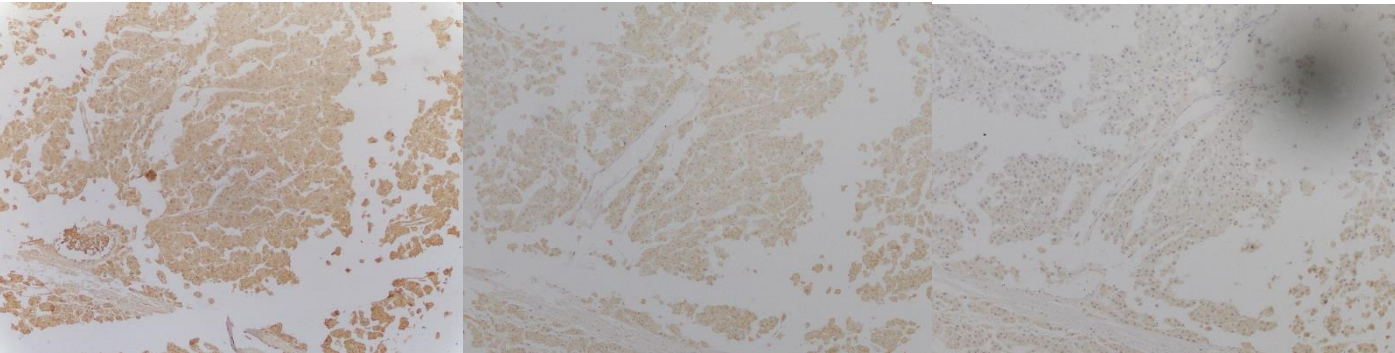

2015336

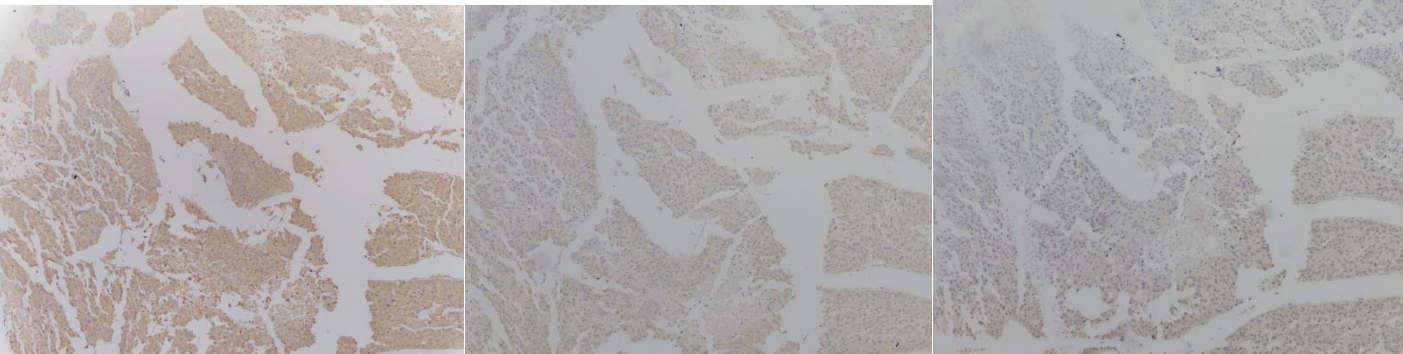

E-cad

n-cad

NANOG

2015346

ca

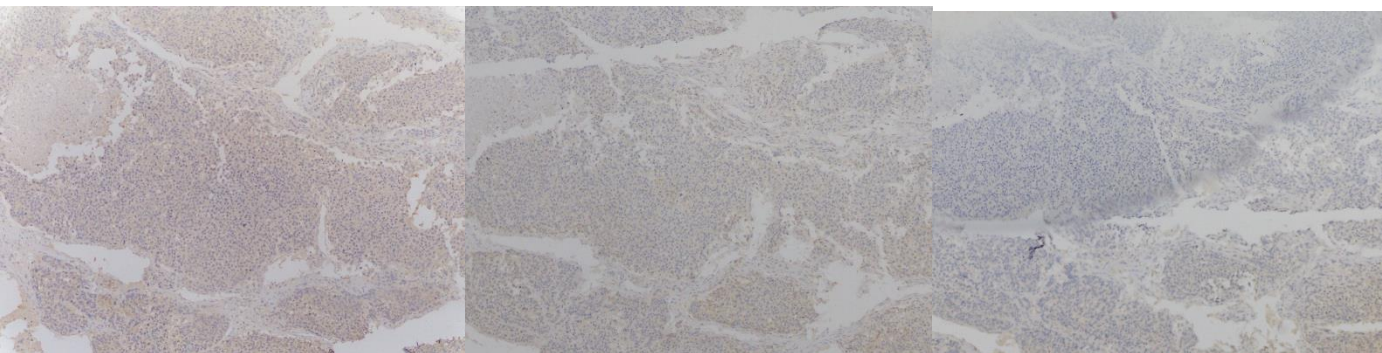

2015350

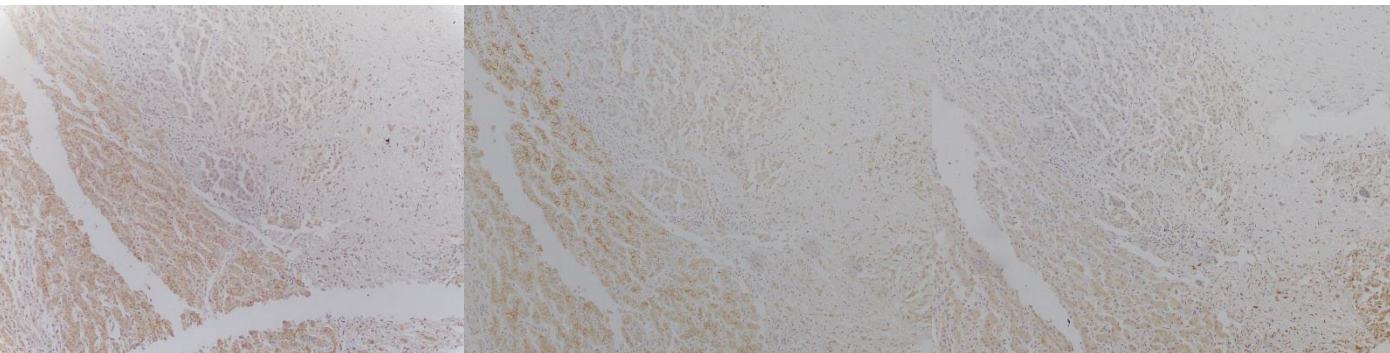

2015361

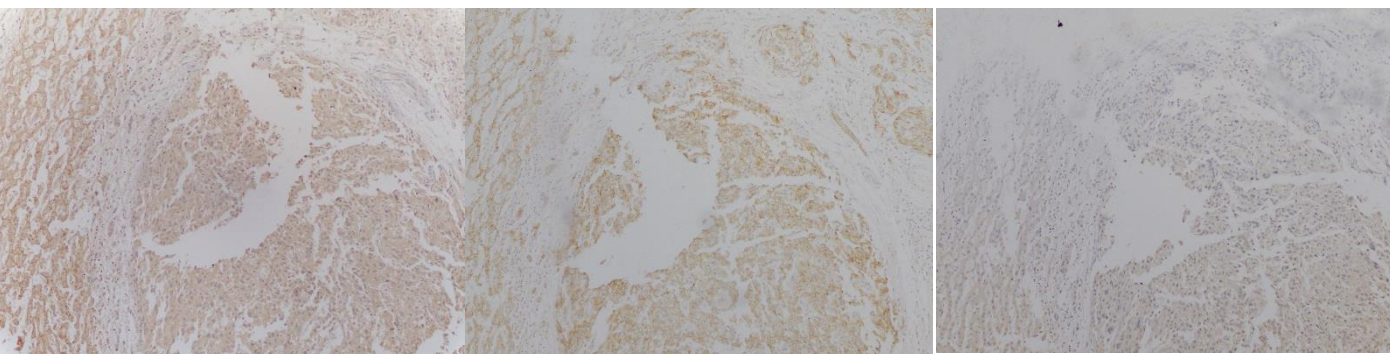

E-cad

n-cad

NANOG

ca

2015366

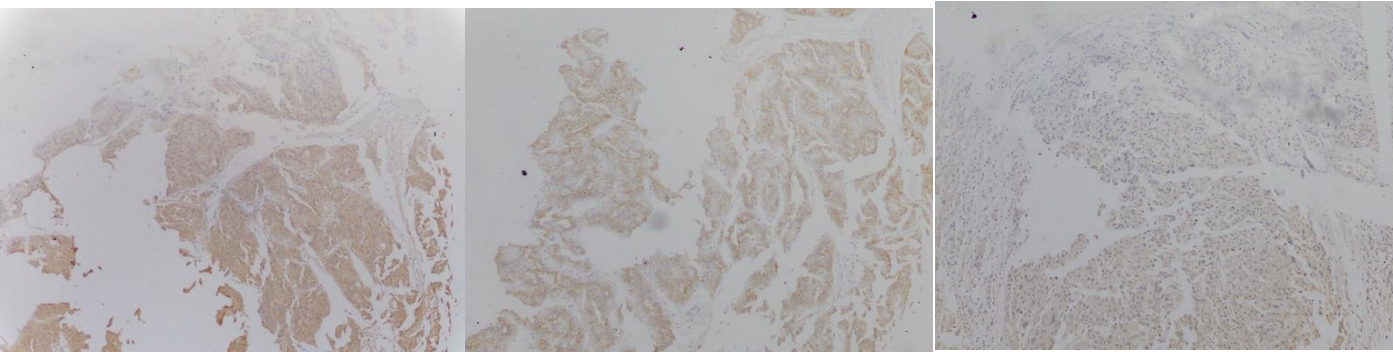

2015412

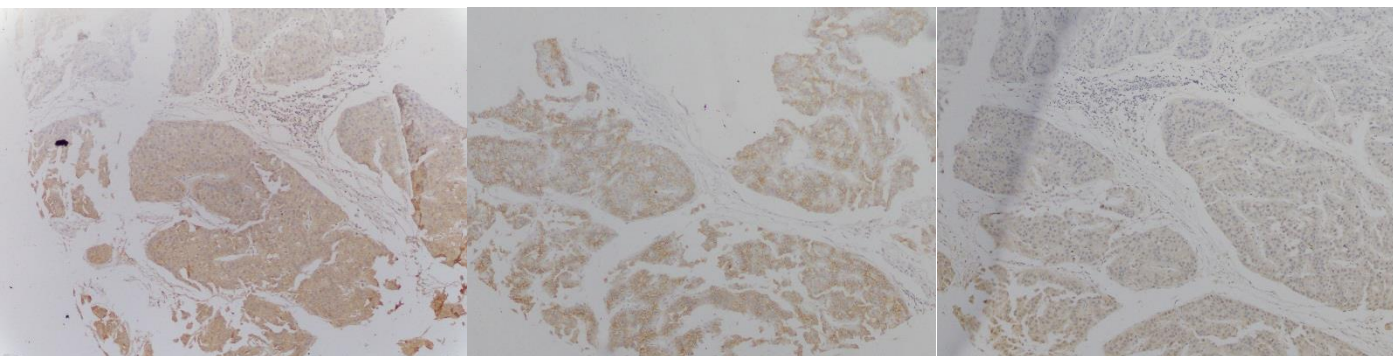

2015416

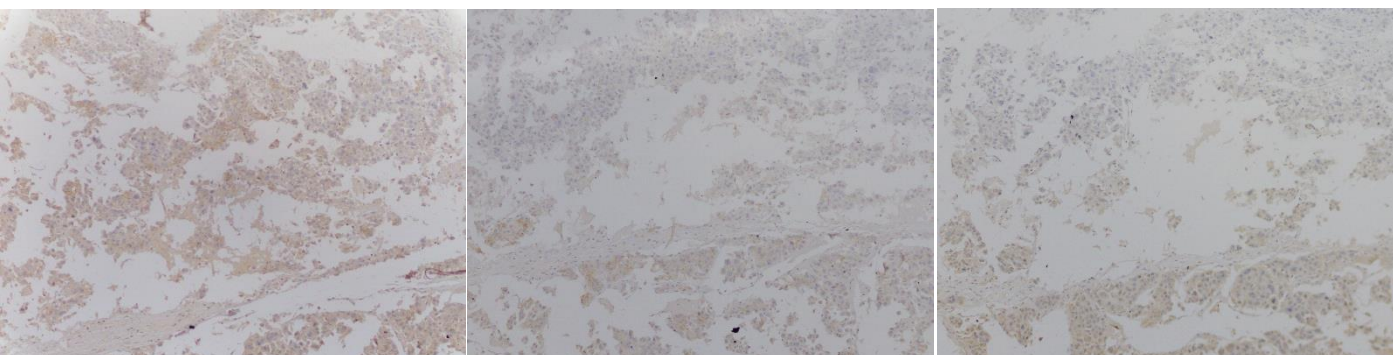

E-cad

n-cad

NANOG

ca

2015417

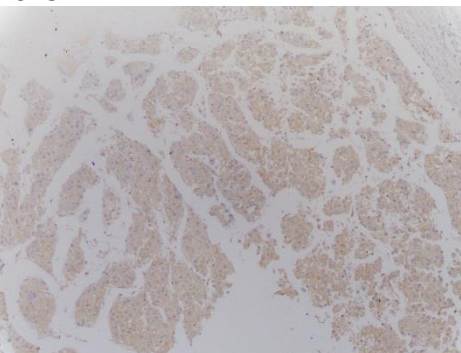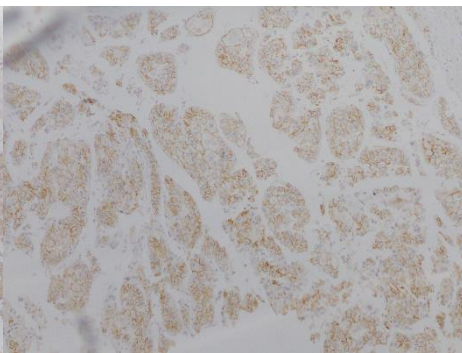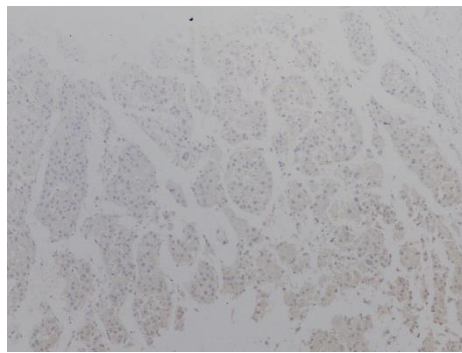

2015433

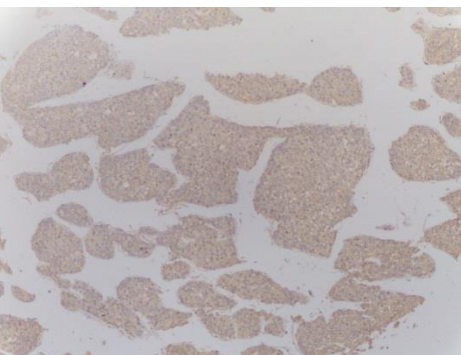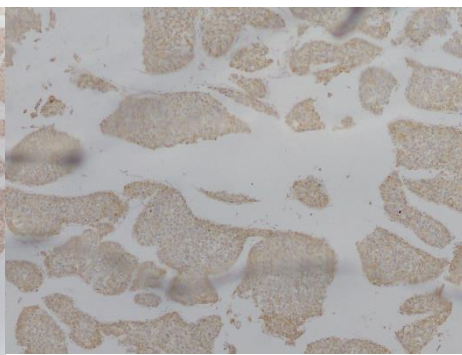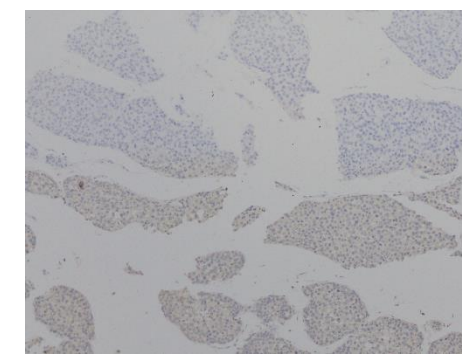

2015447

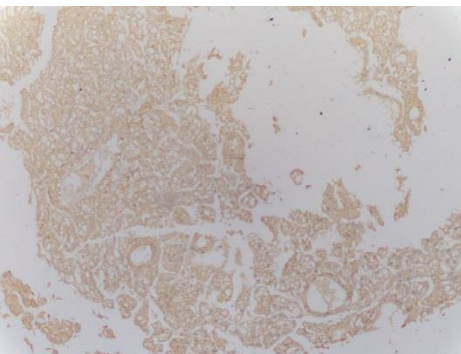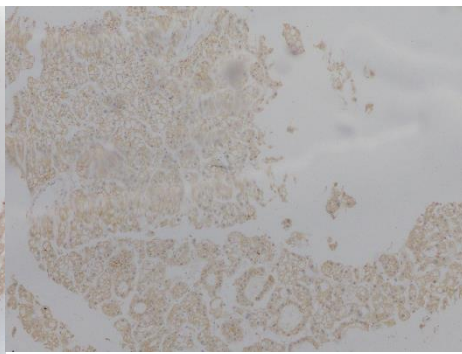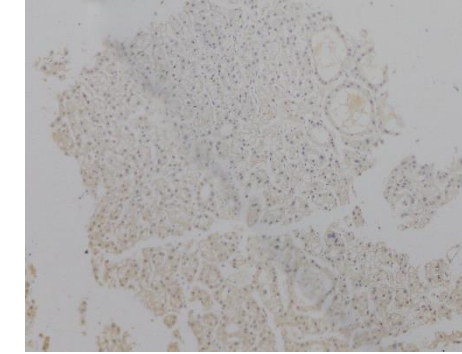

E-cad

n-cad

nanog

2013023 ca

pc

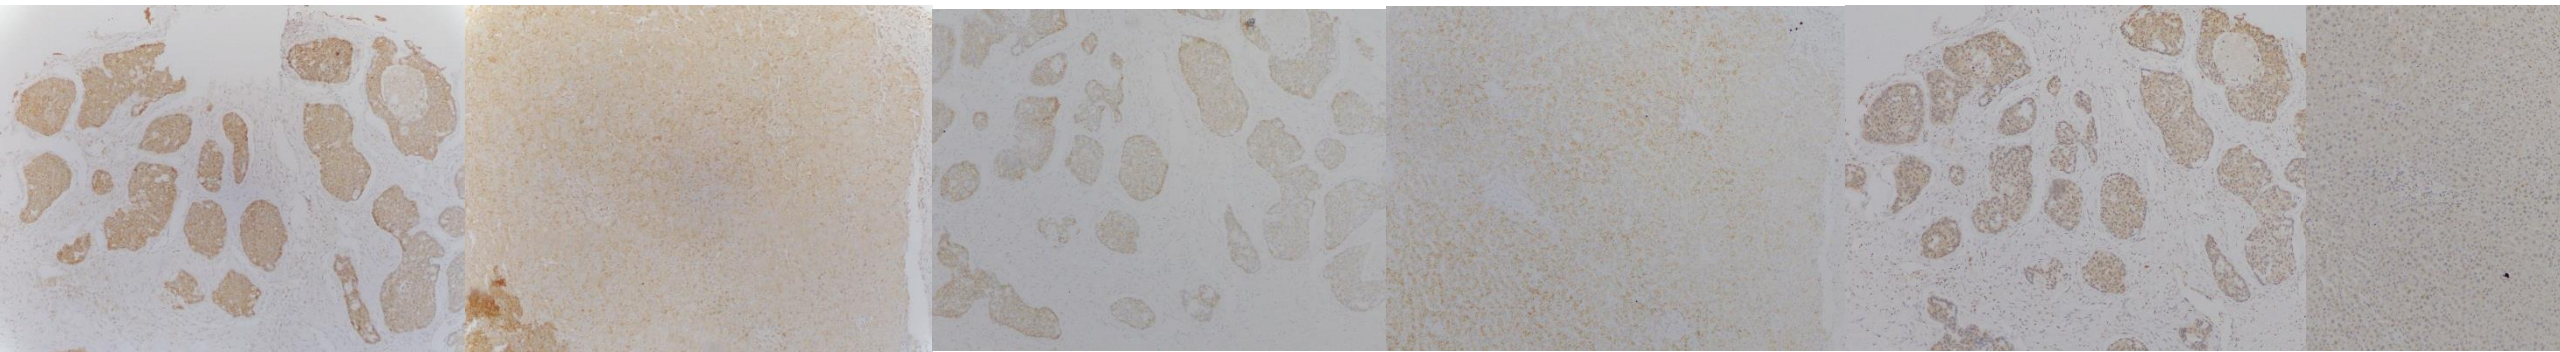

2013031

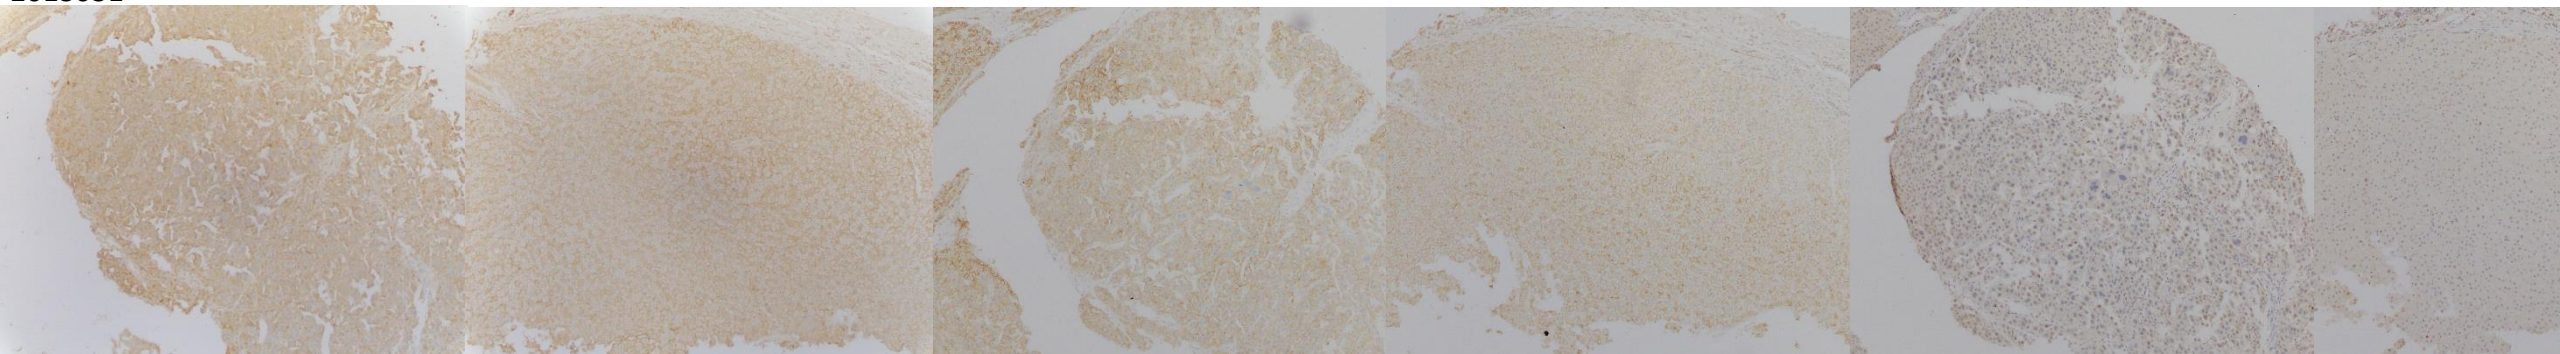

2013200

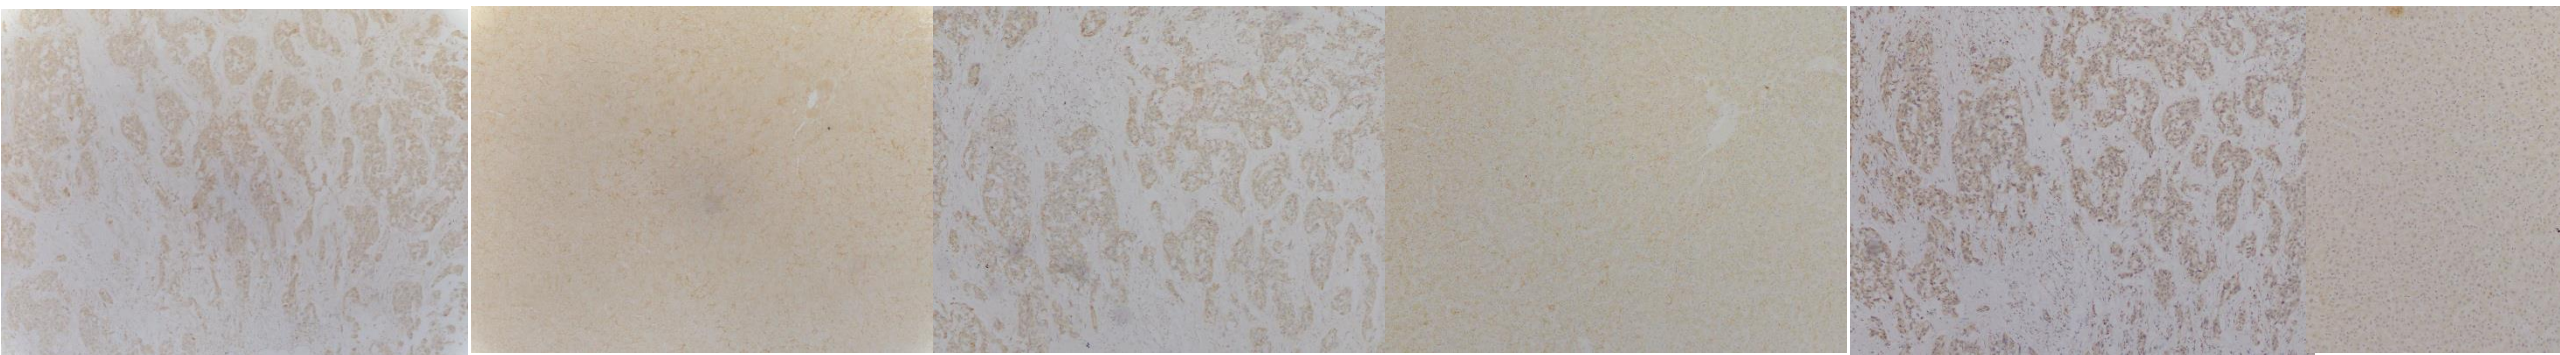

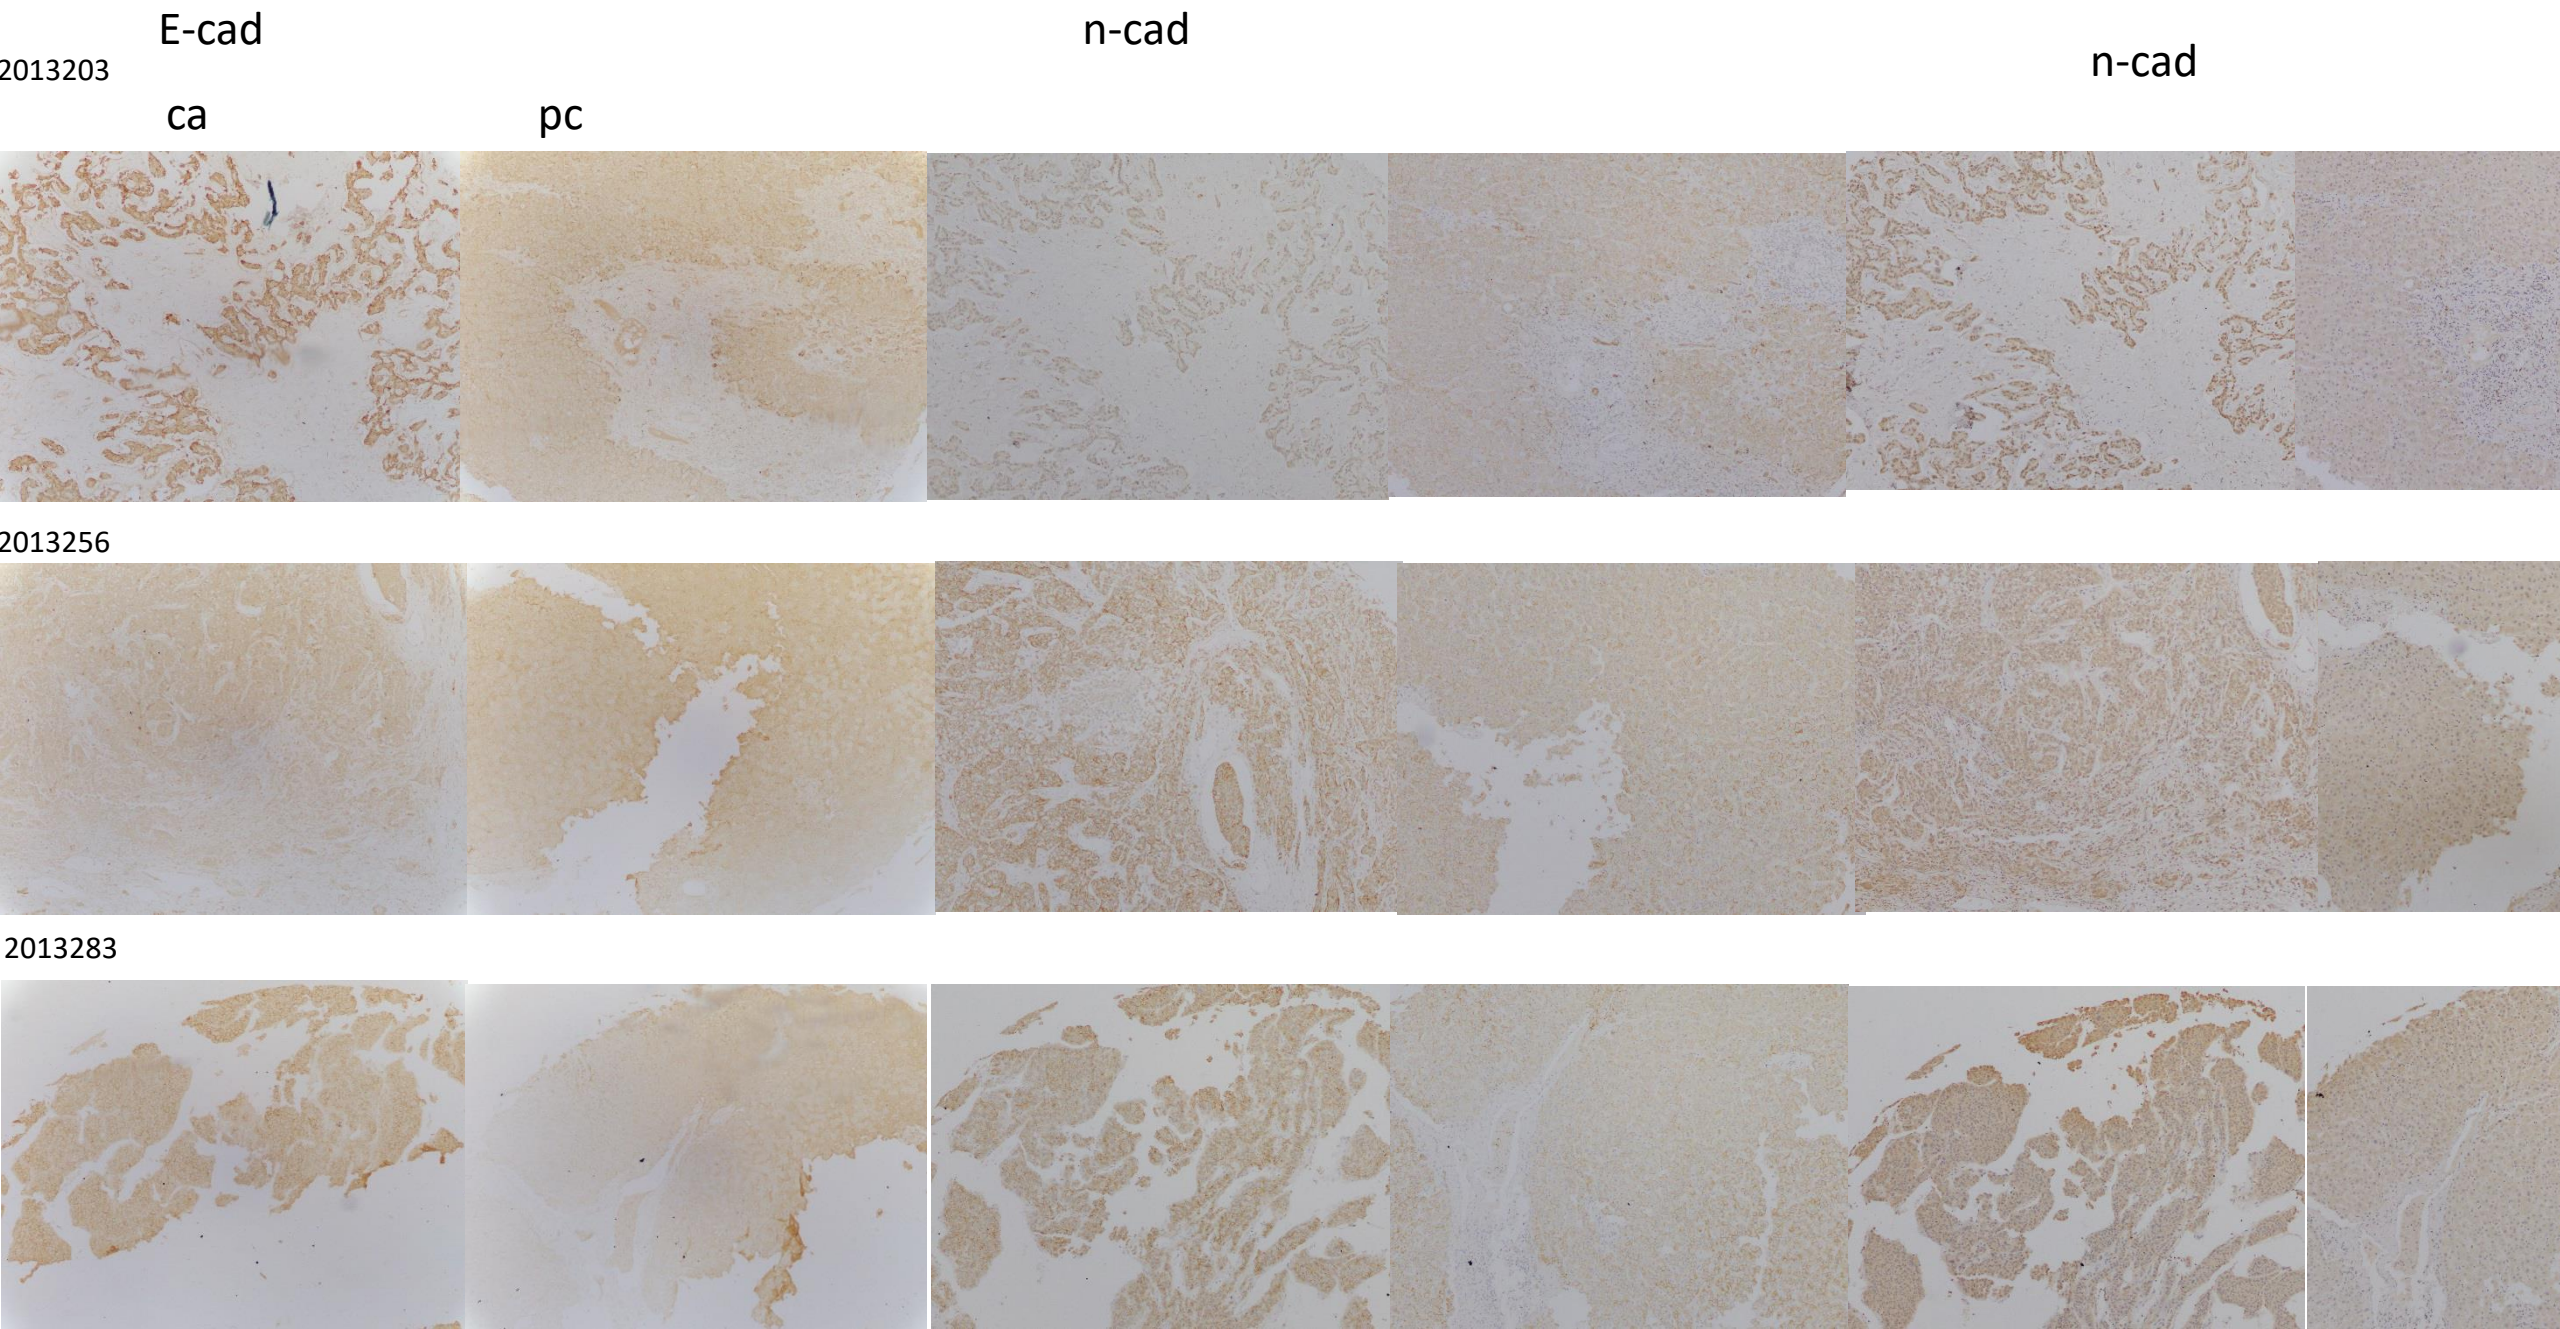

E-cad

ca

pc

n-cad

NANOG

2013369

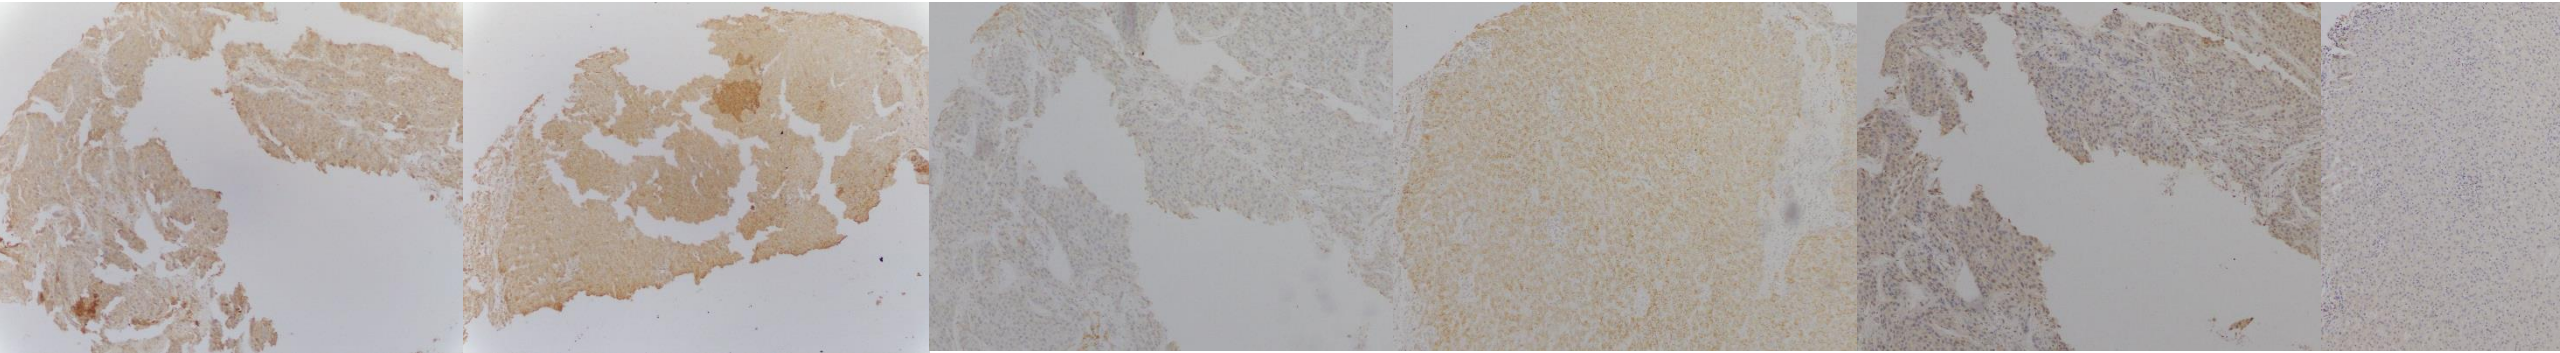

2013488

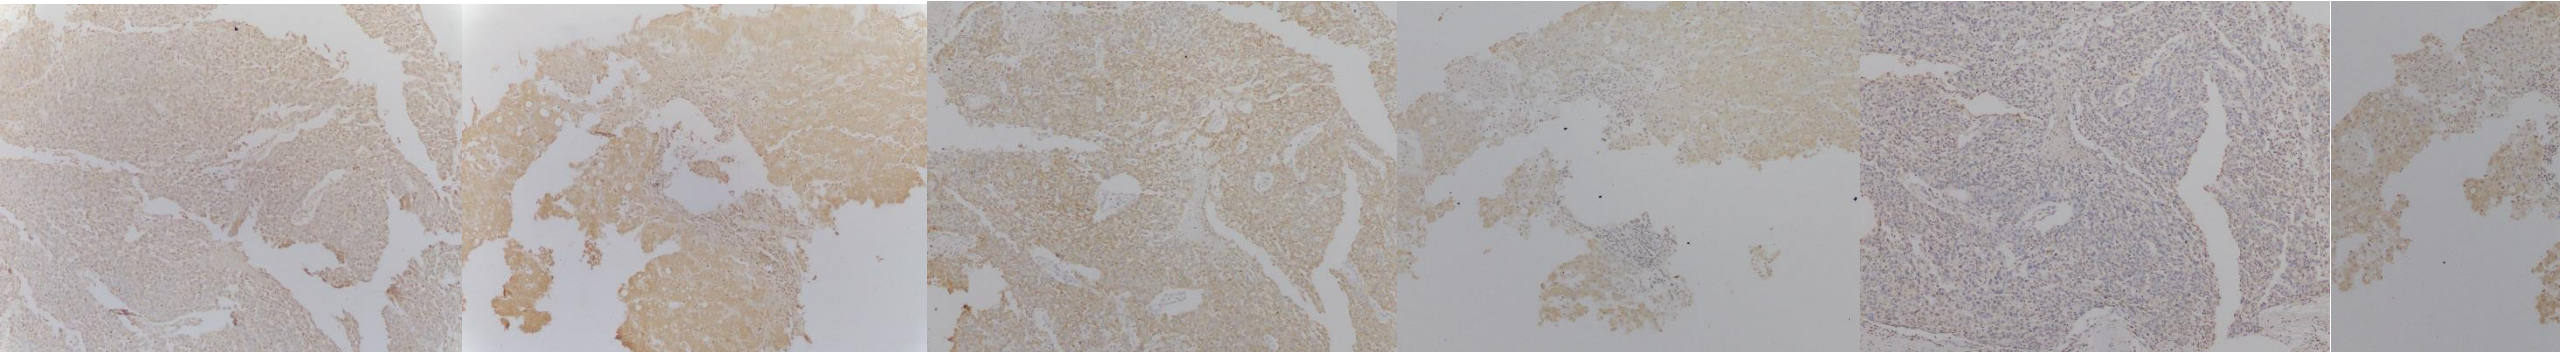

2013557

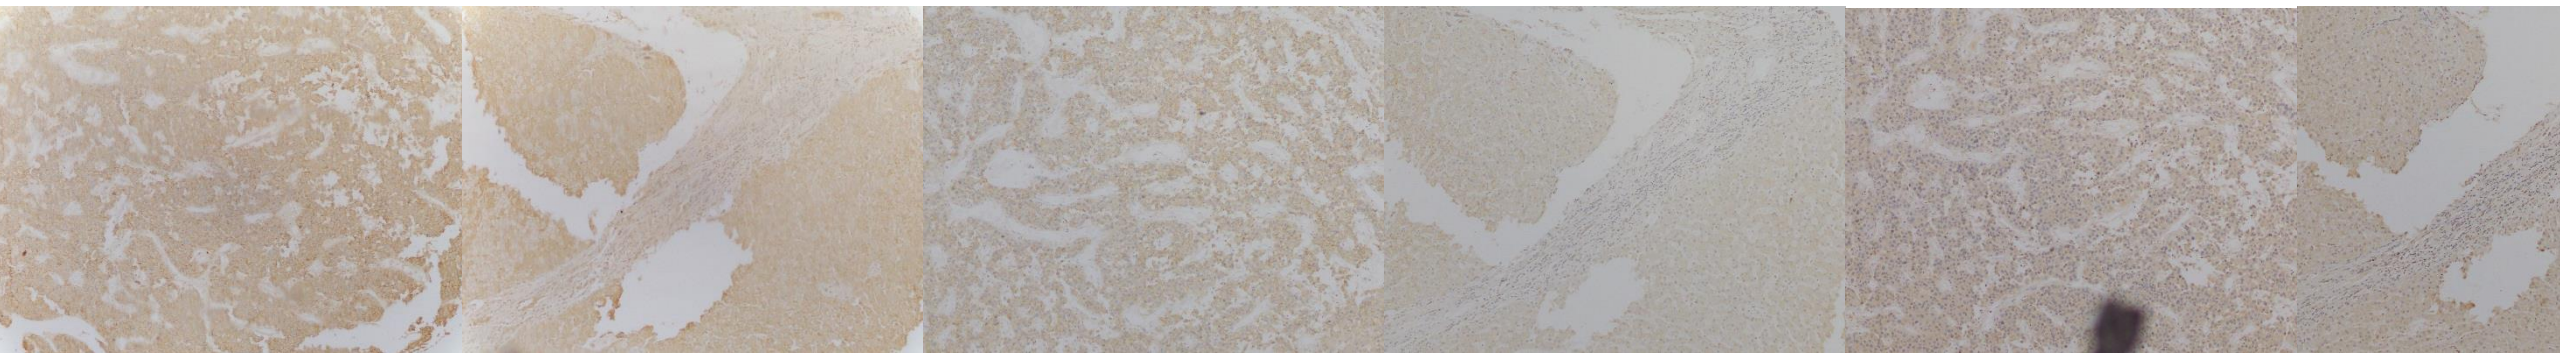



E-cad

ca

pc

n-cad

NANOG

2013571

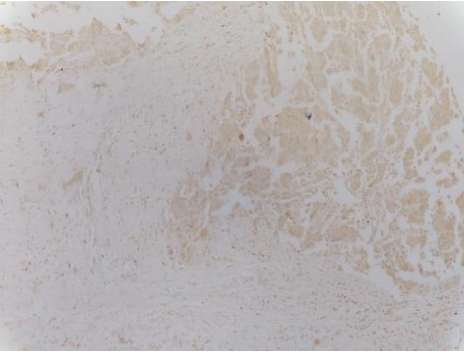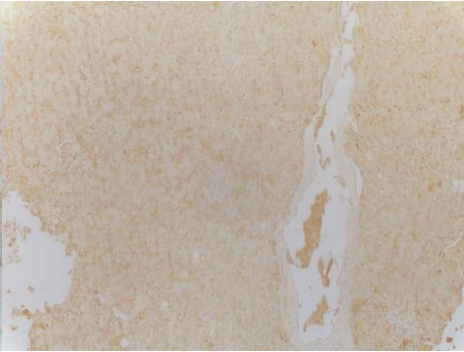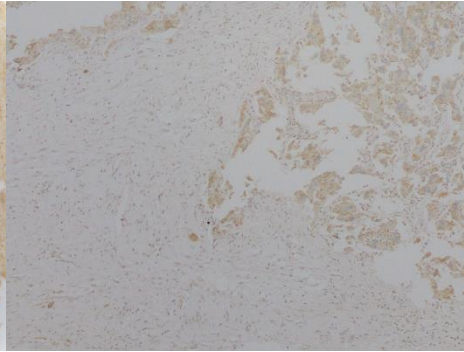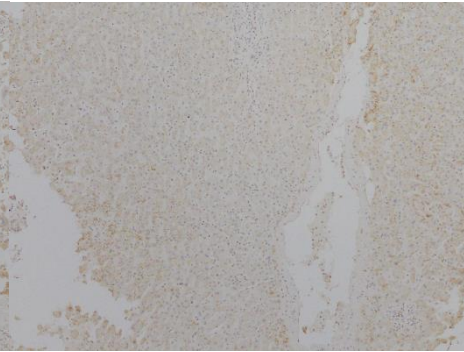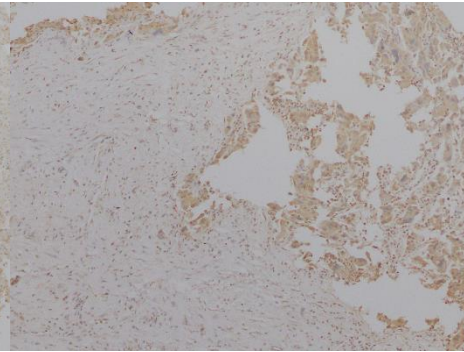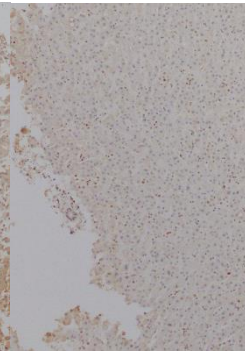

2013852

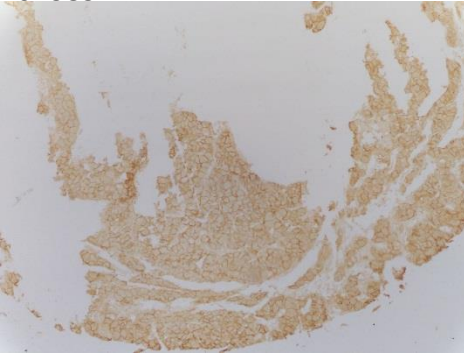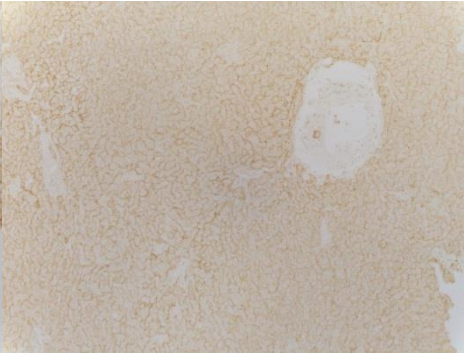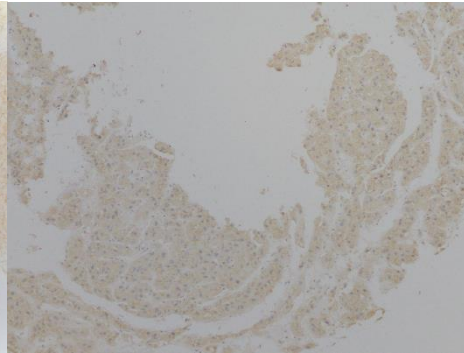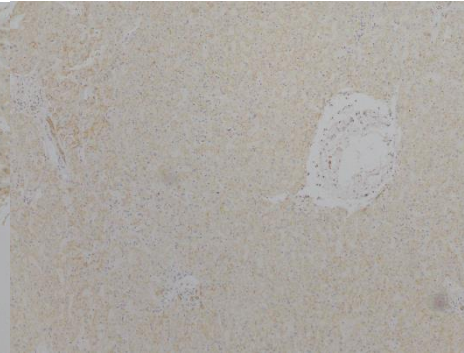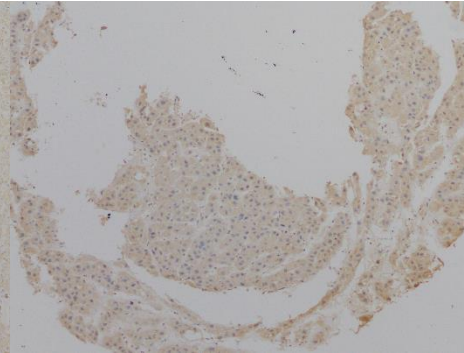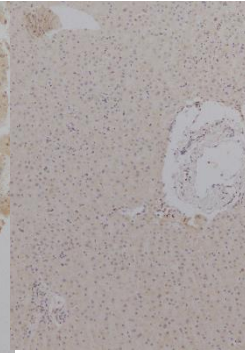

2013867

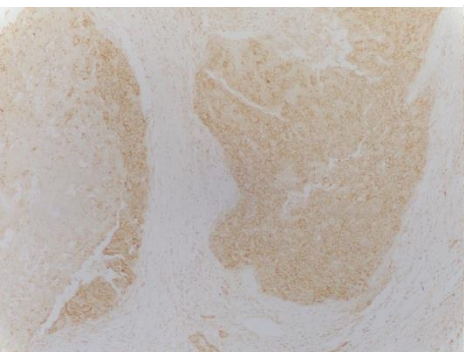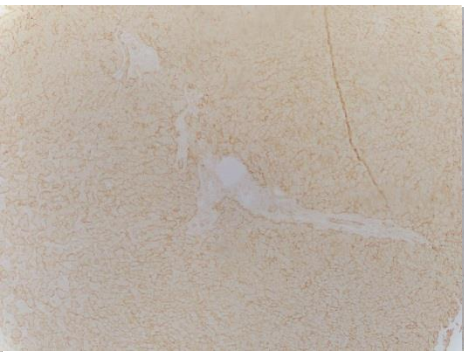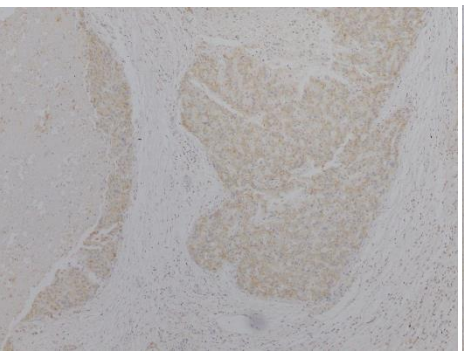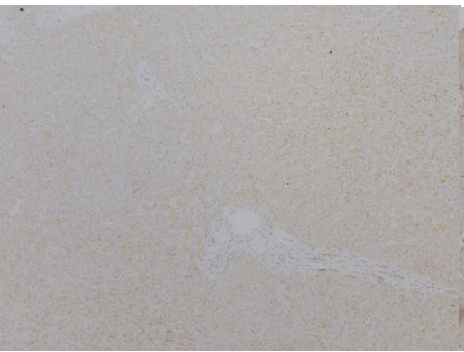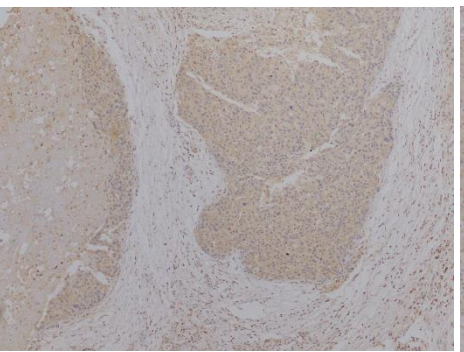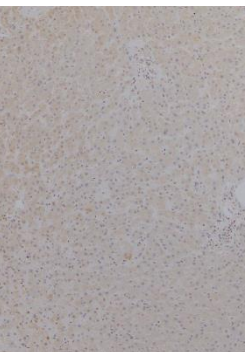

E-cad

N-cad

NANOG

2013013

ca

pc

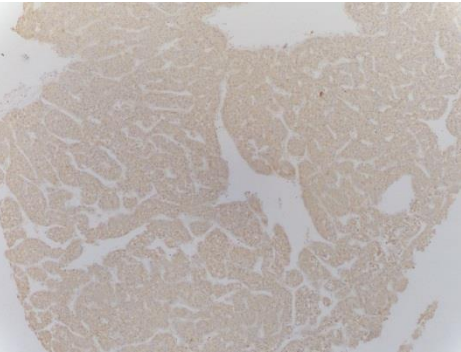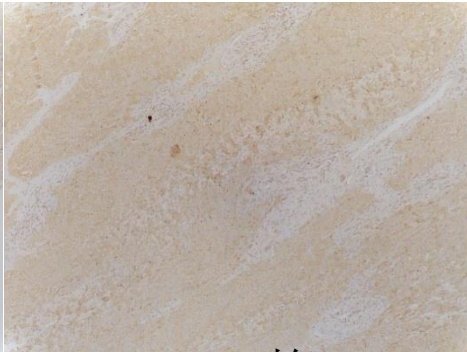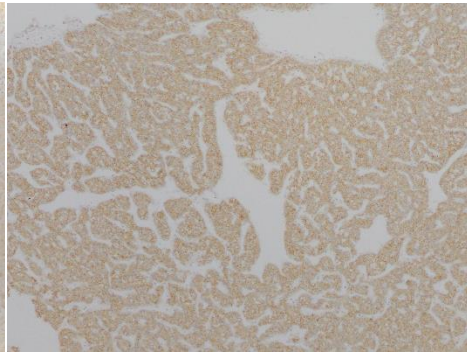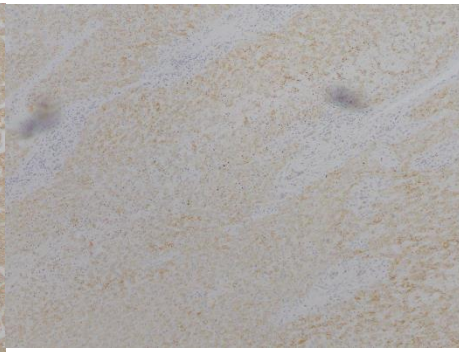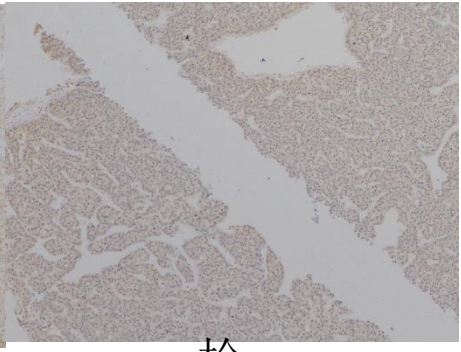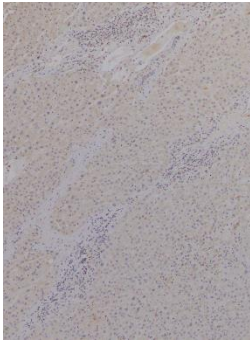

2013019

栓

N-cad 栓

栓

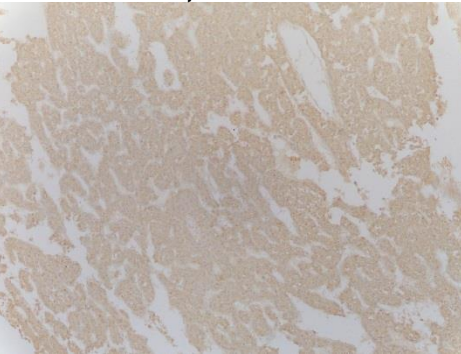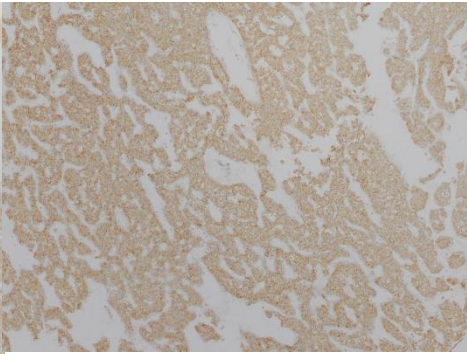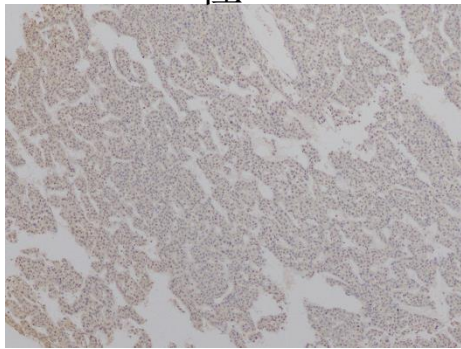

2013088

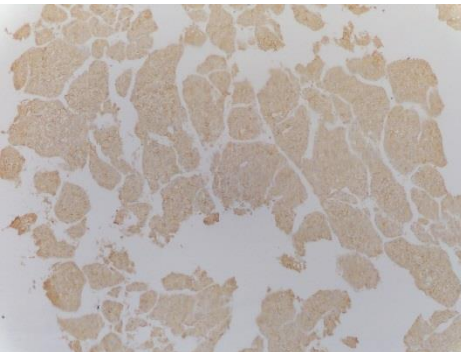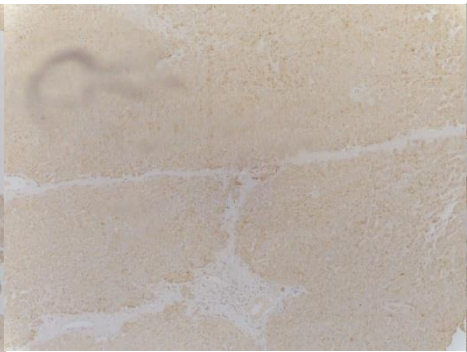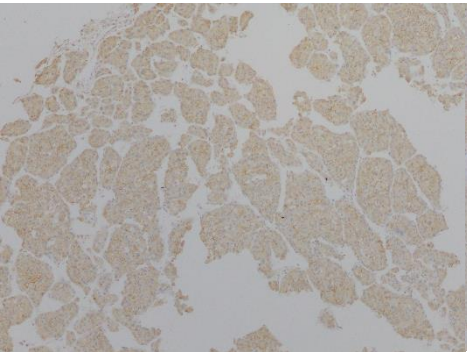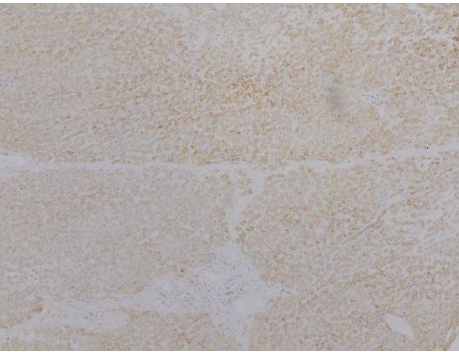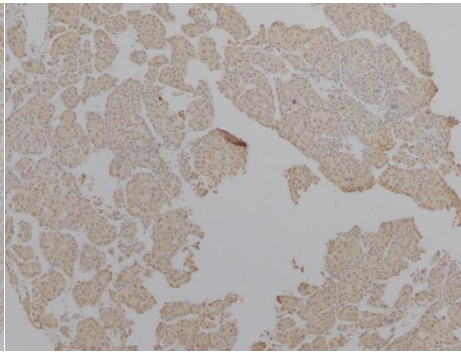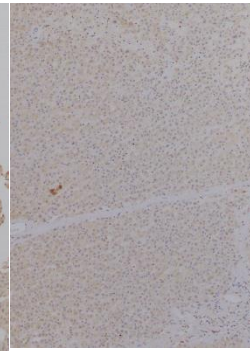

2013088 栓

E-cad

N-cad

NANOG

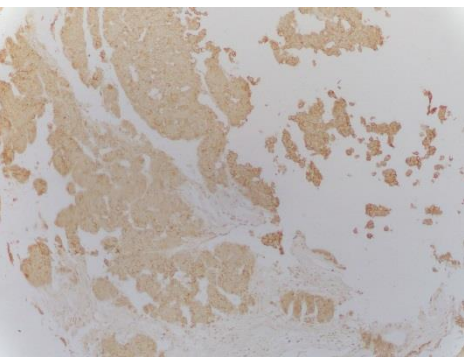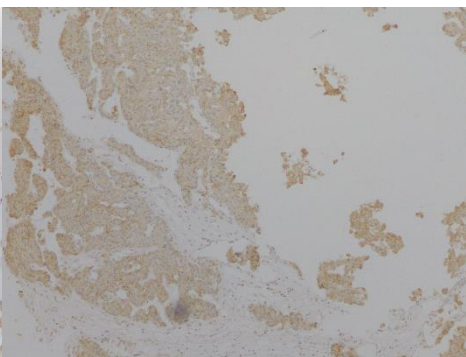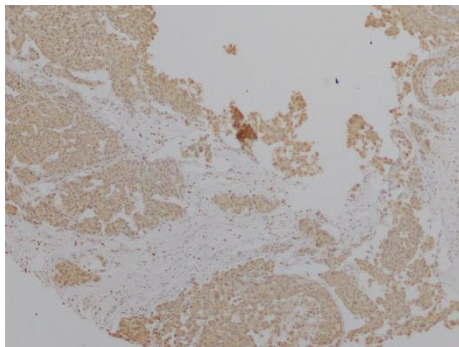

2015539 Ca

N-cad

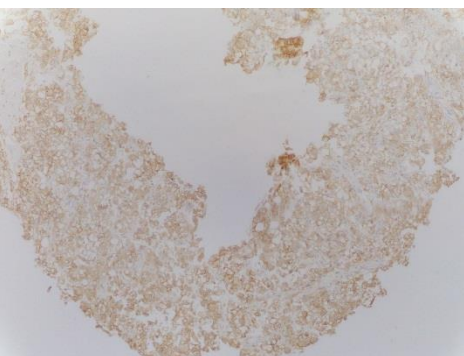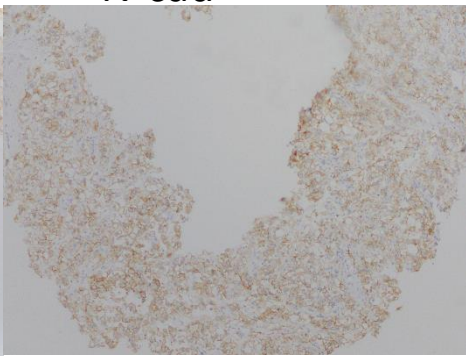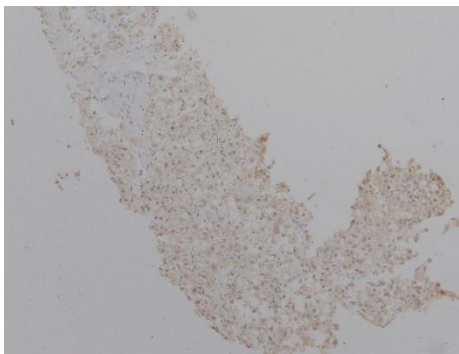

2015557 Ca

N-cad

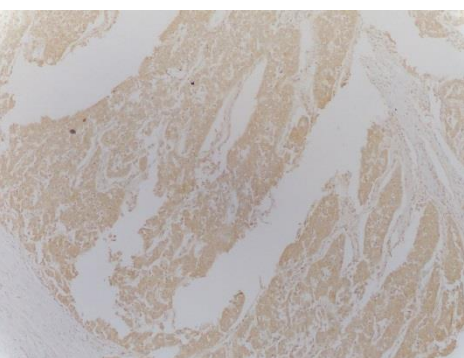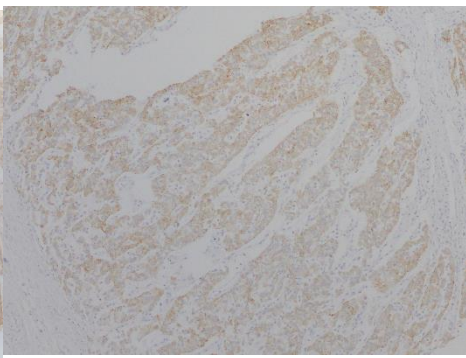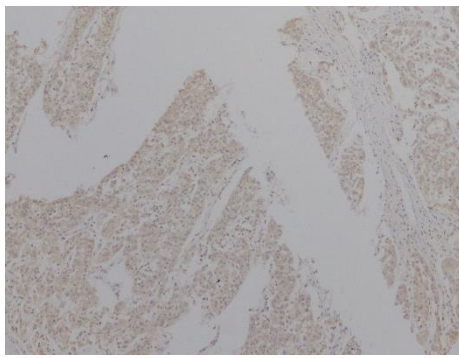

E-cad

N-cad

NANOG

2015564 ca

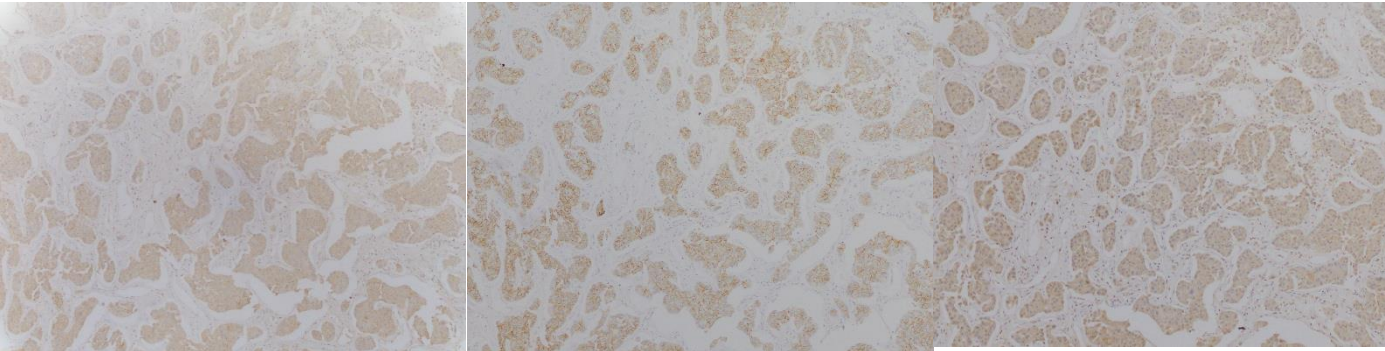

2015650

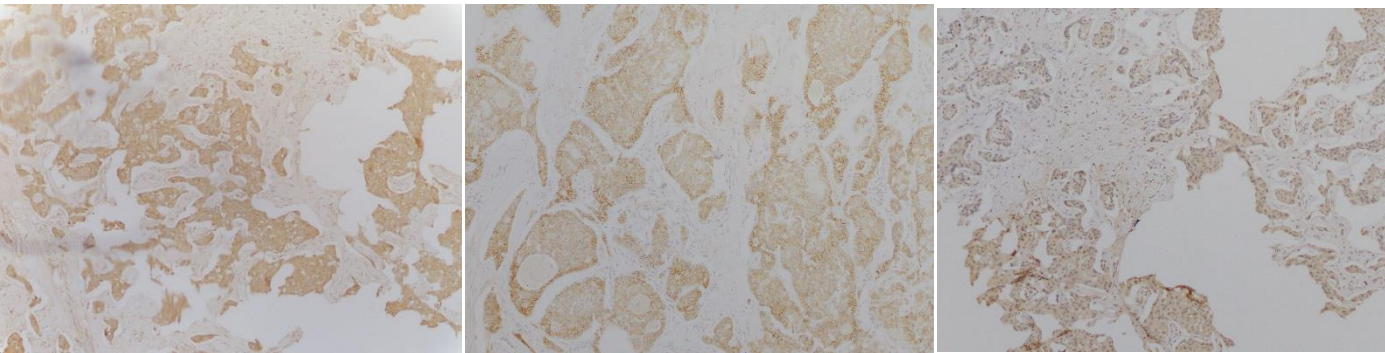

2015659

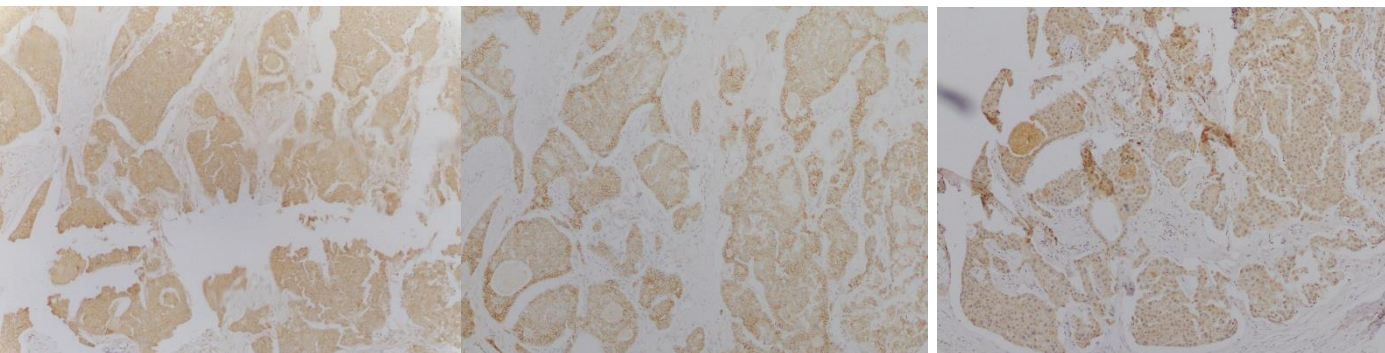

E-cad

n-cad

NANOG

2016028 Ca

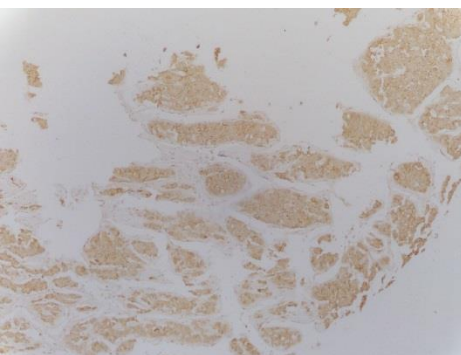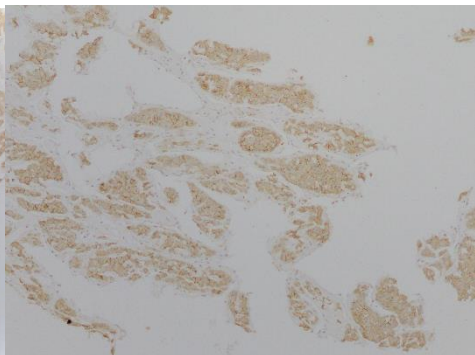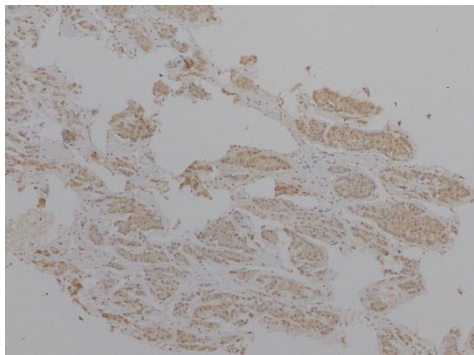

2016182 Ca

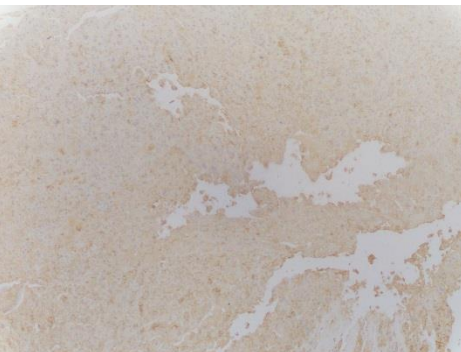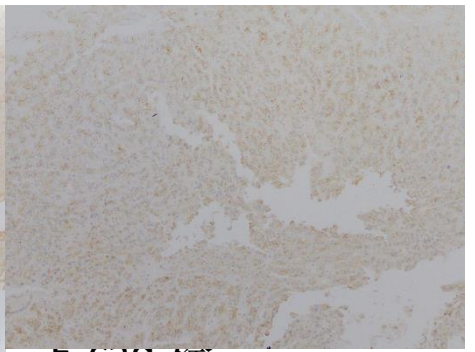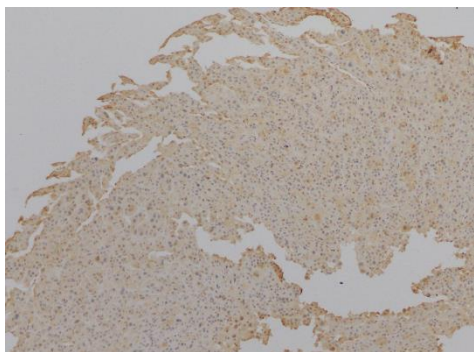

2013199 Ca

E-cad 柱

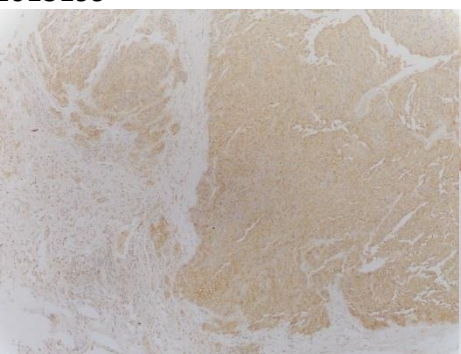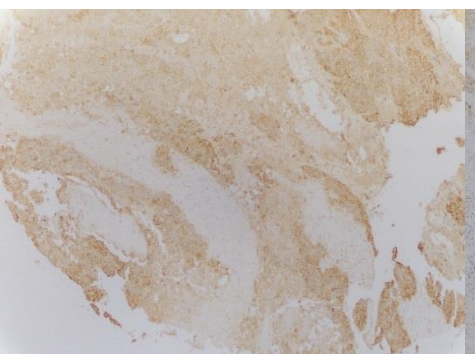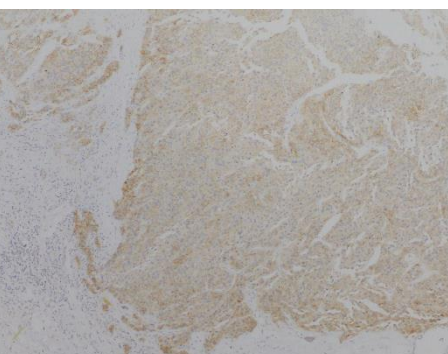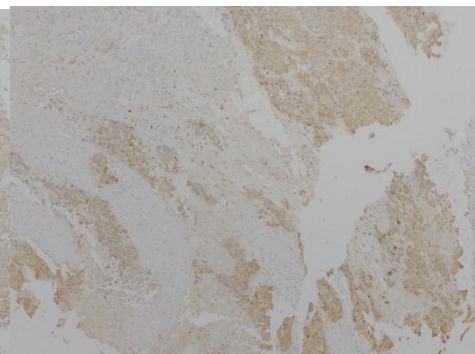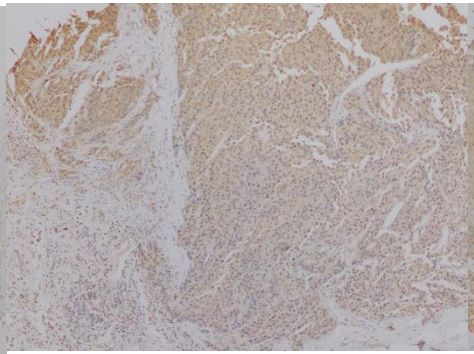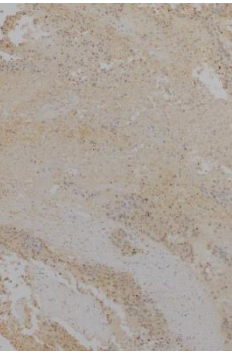

2013556 E-cad ca

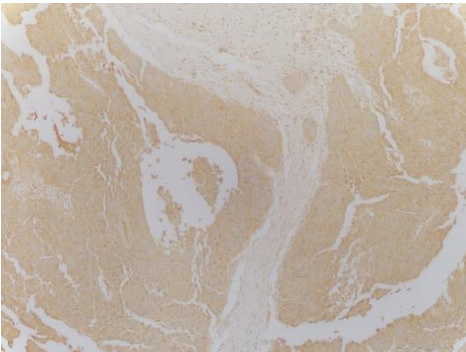

n-cad ca

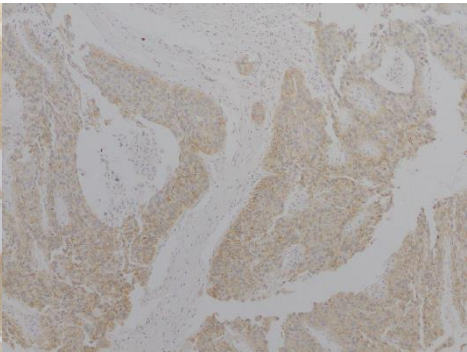

NANOG

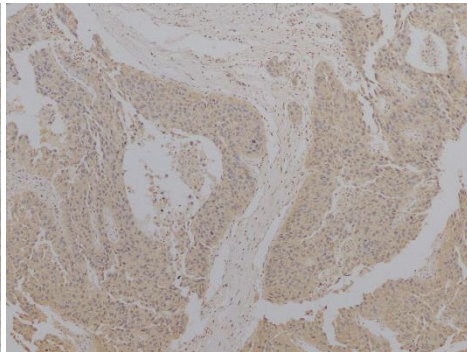

2015461 E-cad

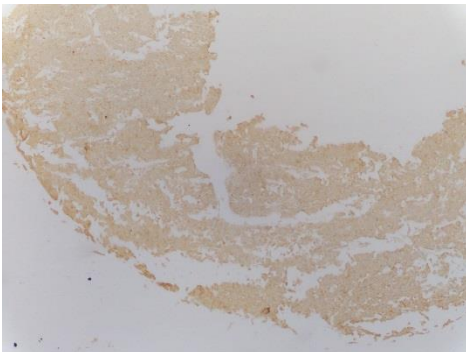

n-cad ca

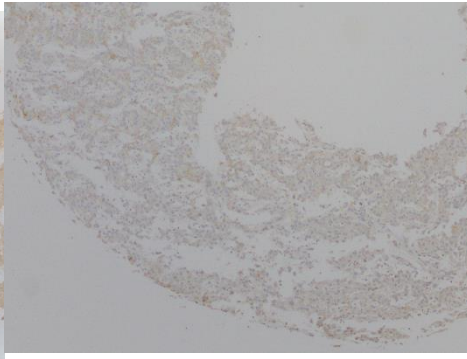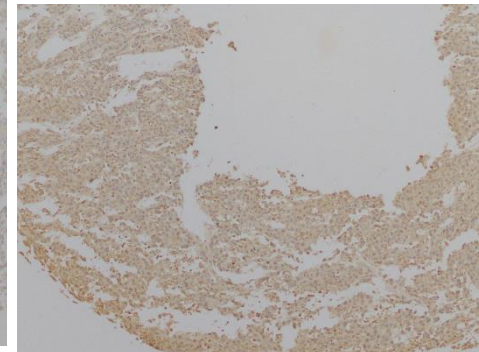

Supplement: DataSheet_1.pdf [file DataSheet_1.pdf]
